# Supplementary material for: CFTR modulator therapy drives microbiome restructuring through improved host physiology in cystic fibrosis: the IMMProveCF phase IV trial
Source: Nat Commun. 2025 Nov 18;16:10111. doi: 10.1038/s41467-025-64218-z (PMC12627475; doi:10.1038/s41467-025-64218-z)
Supplement: Supplementary file 3 — Supplementary Data 1-18 [file 41467_2025_64218_MOESM3_ESM.xlsx]

## Sheet: Supp_data1
Supplementary Data 1: Linear mixed effect model results on the delta of clinical parameters
Dependent variable	Months_after_ETI_start	N_obs	Total_N_obs	Estimate	Std..Error	df	t.value	p	fdr	fdr_star
Delta ppFEV1	Baseline (Intercept)	35	235	1.01584	3.40457	38.643	0.298376	0.76701	0.84372	ns
Delta ppFEV1	3	30	235	12.4629	1.54823	193.342	8.04977	0	0	***
Delta ppFEV1	6	31	235	11.3119	1.5384	194.315	7.35302	0	0	***
Delta ppFEV1	9	31	235	13.4352	1.53892	194.479	8.73025	0	0	***
Delta ppFEV1	12	26	235	9.39343	1.63211	196.033	5.75541	0	0	***
Delta ppFEV1	15	22	235	10.228	1.72986	196.796	5.91258	0	0	***
Delta ppFEV1	18	20	235	7.48129	1.79309	198.434	4.1723	5e-05	8e-05	***
Delta ppFEV1	21	22	235	6.8597	1.73549	198.809	3.95259	0.00011	0.00017	***
Delta ppFEV1	24	18	235	6.34048	1.87486	200.429	3.38184	0.00087	0.00119	**
Delta ppFEV1	sex	235	NA	-1.49021	2.98667	32.3032	-0.498953	0.62119	0.75924	ns
Delta ppFEV1	age_y	235	NA	-0.0100933	0.107962	33.0765	-0.0934894	0.92608	0.92608	ns
Delta sweat chloride (mmol/l)	Baseline (Intercept)	34	116	-0.446111	4.03906	40.674	-0.110449	0.9126	0.9126	ns
Delta sweat chloride (mmol/l)	3	24	116	-36.3785	2.77504	78.9851	-13.1092	0	0	***
Delta sweat chloride (mmol/l)	6	6	116	-34.7004	4.96659	90.7994	-6.98678	0	0	***
Delta sweat chloride (mmol/l)	9	3	116	-31.8304	6.87805	90.5629	-4.62783	1e-05	2e-05	***
Delta sweat chloride (mmol/l)	12	18	116	-40.9264	3.08609	81.8824	-13.2616	0	0	***
Delta sweat chloride (mmol/l)	15	5	116	-38.3446	5.33597	88.9782	-7.18605	0	0	***
Delta sweat chloride (mmol/l)	18	14	116	-44.8826	3.42895	83.23	-13.0893	0	0	***
Delta sweat chloride (mmol/l)	21	2	116	-31.6547	8.16489	87.7624	-3.87693	0.0002	0.00028	***
Delta sweat chloride (mmol/l)	24	10	116	-42.4303	3.91065	82.8728	-10.8499	0	0	***
Delta sweat chloride (mmol/l)	sex	116	NA	3.28137	3.4513	30.0867	0.950765	0.3493	0.42692	ns
Delta sweat chloride (mmol/l)	age_y	116	NA	-0.0477268	0.125577	31.0816	-0.380061	0.70648	0.77713	ns
Delta IgG (g/l)	Baseline (Intercept)	30	200	1.00078	0.721007	32.3625	1.38803	0.17461	0.19207	ns
Delta IgG (g/l)	3	26	200	-1.21172	0.304387	163.415	-3.98087	0.0001	0.00016	***
Delta IgG (g/l)	6	26	200	-1.56153	0.305677	164.341	-5.10843	0	0	***
Delta IgG (g/l)	9	26	200	-1.68853	0.306061	164.682	-5.51697	0	0	***
Delta IgG (g/l)	12	21	200	-1.78004	0.328848	165.791	-5.41297	0	0	***
Delta IgG (g/l)	15	18	200	-1.79383	0.347886	166.524	-5.15637	0	0	***
Delta IgG (g/l)	18	18	200	-1.55909	0.348735	167.715	-4.47069	1e-05	3e-05	***
Delta IgG (g/l)	21	18	200	-1.65652	0.348652	168.244	-4.75123	0	1e-05	***
Delta IgG (g/l)	24	17	200	-1.21538	0.359268	170.207	-3.38293	0.00089	0.00122	**
Delta IgG (g/l)	sex	200	NA	0.370011	0.655919	27.749	0.564111	0.57721	0.57721	ns
Delta IgG (g/l)	age_y	200	NA	-0.0498634	0.0234825	28.4481	-2.12343	0.04254	0.052	.
Delta antibiotic tt days	Baseline (Intercept)	35	236	12.6829	12.6917	44.9984	0.999307	0.32299	0.32299	ns
Delta antibiotic tt days	3	29	236	-11.3029	7.31107	197.074	-1.546	0.12371	0.13608	ns
Delta antibiotic tt days	6	30	236	-16.4789	7.25578	197.942	-2.27114	0.02421	0.0333	*
Delta antibiotic tt days	9	31	236	-29.4924	7.18175	197.647	-4.10657	6e-05	0.00011	***
Delta antibiotic tt days	12	25	236	-43.9172	7.71314	199.655	-5.69381	0	0	***
Delta antibiotic tt days	15	23	236	-42.109	7.94733	200.169	-5.29851	0	0	***
Delta antibiotic tt days	18	22	236	-46.5568	8.08777	201.122	-5.75644	0	0	***
Delta antibiotic tt days	21	22	236	-43.8305	8.08332	201.425	-5.42234	0	0	***
Delta antibiotic tt days	24	19	236	-47.3194	8.55889	202.587	-5.52869	0	0	***
Delta antibiotic tt days	sex	236	NA	23.4806	10.831	34.1406	2.16791	0.03723	0.0455	*
Delta antibiotic tt days	age_y	236	NA	-1.00179	0.392934	34.9274	-2.54953	0.01533	0.0241	*

## Sheet: Supp_data2
Supplementary Data 2: Linear mixed model results of all clinical parameters
Dependent variable	Months_after_ETI_start	N_obs	Total_N_obs	Median	IQR	Estimate	Std..Error	df	t.value	p	fdr	fdr_star
Sweat chloride (mmol/l)	Baseline (Intercept)	34	119	85.75	17.125	69.0855	4.32796	42.4778	15.9626	0	0	***
Sweat chloride (mmol/l)	3	25	119	50	14.1	-35.6684	2.72987	82.0948	-13.066	0	0	***
Sweat chloride (mmol/l)	6	6	119	42.4	21.85	-35.0235	4.9689	91.984	-7.04855	0	0	***
Sweat chloride (mmol/l)	9	3	119	35	15	-37.3911	6.87851	91.5499	-5.43592	0	0	***
Sweat chloride (mmol/l)	12	19	119	44	27	-40.6821	3.02341	84.7804	-13.4557	0	0	***
Sweat chloride (mmol/l)	15	5	119	38	16	-39.2537	5.33095	90.112	-7.36336	0	0	***
Sweat chloride (mmol/l)	18	14	119	50	28.25	-44.5773	3.41427	85.44	-13.0562	0	0	***
Sweat chloride (mmol/l)	21	2	119	64.5	3.5	-32.9562	8.15135	88.8631	-4.04304	0.00011	0.00014	***
Sweat chloride (mmol/l)	24	11	119	46	18	-42.0315	3.75978	86.3029	-11.1793	0	0	***
Sweat chloride (mmol/l)	sex	119				10.0339	3.69515	32.7502	2.71543	0.01048	0.01048	*
Sweat chloride (mmol/l)	age_y	119				0.425576	0.134853	33.685	3.15585	0.00336	0.0037	**
ppFEV1	Baseline (Intercept)	35	235	81.9	30.6	97.7855	7.45471	34.2858	13.1173	0	0	***
ppFEV1	3	30	235	96.85	23.725	12.6649	1.56094	192.094	8.11363	0	0	***
ppFEV1	6	31	235	98	23.2	11.732	1.55576	194.435	7.54097	0	0	***
ppFEV1	9	31	235	97	30	13.7879	1.55844	195.794	8.84725	0	0	***
ppFEV1	12	26	235	87.45	30.05	9.85826	1.66039	199.086	5.9373	0	0	***
ppFEV1	15	22	235	88.05	25	11.0826	1.76637	202.101	6.27421	0	0	***
ppFEV1	18	20	235	84.1	29	8.47722	1.84565	208.078	4.59309	1e-05	1e-05	***
ppFEV1	21	22	235	81	34.5	7.78046	1.79013	209.553	4.34631	2e-05	3e-05	***
ppFEV1	24	18	235	79	22.25	7.69241	1.94937	214.443	3.94611	0.00011	0.00013	***
ppFEV1	sex	235				4.5112	6.82759	31.6839	0.660731	0.51356	0.51356	ns
ppFEV1	age_y	235				-0.758258	0.242517	34.3534	-3.12662	0.00359	0.00395	**
ppFVC	Baseline (Intercept)	35	234	94.3	22.65	101.129	5.80767	34.2965	17.4131	0	0	***
ppFVC	3	30	234	107.25	22.775	10.6705	1.59833	190.943	6.67603	0	0	***
ppFVC	6	31	234	103.4	16.85	9.55251	1.59079	192.468	6.00489	0	0	***
ppFVC	9	31	234	102.3	15.9	11.6135	1.59227	193.236	7.29364	0	0	***
ppFVC	12	26	234	102.45	15.925	9.47288	1.69293	195.45	5.59557	0	0	***
ppFVC	15	21	234	102.5	16.4	8.28629	1.82525	197.229	4.5398	1e-05	2e-05	***
ppFVC	18	20	234	101.75	15.5	6.77528	1.87049	201.286	3.62219	0.00037	0.00051	***
ppFVC	21	22	234	102	18	6.74838	1.81222	202.302	3.72382	0.00025	0.0004	***
ppFVC	24	18	234	97.5	14.25	4.9189	1.96543	205.94	2.5027	0.0131	0.01601	*
ppFVC	sex	234				5.42064	5.25969	31.4682	1.0306	0.31058	0.31058	ns
ppFVC	age_y	234				-0.324046	0.188477	33.0135	-1.71928	0.09493	0.10442	ns
IgG (g/l)	Baseline (Intercept)	30	232	13.815	7.6925	10.2535	1.21807	34.6385	8.41784	0	0	***
IgG (g/l)	3	29	232	12.25	4.96	-1.25249	0.28376	189.268	-4.41391	2e-05	2e-05	***
IgG (g/l)	6	31	232	11.69	5.245	-1.72049	0.281877	191.181	-6.10371	0	0	***
IgG (g/l)	9	31	232	11.34	4.515	-1.84758	0.282558	192.289	-6.53877	0	0	***
IgG (g/l)	12	26	232	11.33	4.4975	-1.90403	0.300589	195.014	-6.33433	0	0	***
IgG (g/l)	15	22	232	11.885	4.49	-1.96221	0.318321	197.824	-6.16426	0	0	***
IgG (g/l)	18	22	232	12.63	4.73	-1.72663	0.320888	202.322	-5.3808	0	0	***
IgG (g/l)	21	22	232	11.925	3.62	-1.87919	0.321404	203.763	-5.8468	0	0	***
IgG (g/l)	24	19	232	12.56	4.585	-1.54036	0.340236	208.917	-4.52733	1e-05	1e-05	***
IgG (g/l)	sex	232				-1.35084	1.11032	31.9178	-1.21661	0.23267	0.23267	ns
IgG (g/l)	age_y	232				0.132131	0.0395804	34.2281	3.3383	0.00204	0.00225	**
Leukocytes (/nl)	Baseline (Intercept)	32	234	7.61	4.1675	9.33854	1.2323	73.2522	7.57816	0	0	***
Leukocytes (/nl)	3	30	234	6.595	1.8425	-1.89687	1.10783	199.402	-1.71225	0.08841	0.2073	ns
Leukocytes (/nl)	6	30	234	6.2	2.5375	-2.08568	1.11058	201.013	-1.878	0.06183	0.2073	ns
Leukocytes (/nl)	9	30	234	6.185	1.885	-1.79189	1.10994	200.765	-1.6144	0.10801	0.2073	ns
Leukocytes (/nl)	12	26	234	6.255	1.96	-1.73165	1.15952	203.458	-1.49343	0.13687	0.2073	ns
Leukocytes (/nl)	15	23	234	5.97	1.87	-1.6622	1.20594	203.111	-1.37835	0.16961	0.2073	ns
Leukocytes (/nl)	18	22	234	5.8	2.15	0.645432	1.22525	204.031	0.526775	0.59892	0.65881	ns
Leukocytes (/nl)	21	22	234	5.95	1.675	-1.75819	1.22397	204.276	-1.43647	0.1524	0.2073	ns
Leukocytes (/nl)	24	19	234	6.3	2.55	-1.82085	1.29184	205.888	-1.4095	0.1602	0.2073	ns
Leukocytes (/nl)	sex	234				-1.70004	0.917222	34.4394	-1.85347	0.0724	0.2073	ns
Leukocytes (/nl)	age_y	234				-0.000495905	0.0336626	36.3751	-0.0147317	0.98833	0.98833	ns
Interleukin 6 (pg/ml)	Baseline (Intercept)	23	142	6	5.5	12.0913	3.34962	66.71	3.60976	0.00059	0.00527	**
Interleukin 6 (pg/ml)	3	17	142	2	1	-10.4237	3.16435	119.796	-3.2941	0.0013	0.00527	**
Interleukin 6 (pg/ml)	6	14	142	3	2.75	-8.29306	3.39101	123.082	-2.4456	0.01588	0.03283	*
Interleukin 6 (pg/ml)	9	19	142	3	2	-10.0902	3.09169	118.858	-3.26364	0.00144	0.00527	**
Interleukin 6 (pg/ml)	12	16	142	4	3.25	-7.79797	3.24822	119.609	-2.40069	0.01791	0.03283	*
Interleukin 6 (pg/ml)	15	7	142	6	3	-8.38253	4.3197	120.46	-1.94054	0.05465	0.06876	.
Interleukin 6 (pg/ml)	18	12	142	4	7.75	-6.66094	3.5555	120.257	-1.87342	0.06344	0.06978	.
Interleukin 6 (pg/ml)	21	19	142	3	3.5	-5.9474	3.0852	119.865	-1.92772	0.05626	0.06876	.
Interleukin 6 (pg/ml)	24	15	142	3	3	-9.91252	3.33804	118.406	-2.96956	0.00361	0.00993	**
Interleukin 6 (pg/ml)	sex	142				-5.57811	2.41486	31.8405	-2.30991	0.02753	0.04326	*
Interleukin 6 (pg/ml)	age_y	142				0.147892	0.0894327	38.4524	1.65367	0.10634	0.10634	ns
Interleukin 8 (pg/ml)	Baseline (Intercept)	28	212	16.4	18.55	33.4005	12.6078	101.076	2.64919	0.00936	0.10301	ns
Interleukin 8 (pg/ml)	3	24	212	10.65	21.575	-13.6132	13.6578	183.333	-0.996735	0.32021	0.62451	ns
Interleukin 8 (pg/ml)	6	29	212	11.7	8	-13.4123	13.0144	183.945	-1.03058	0.30409	0.62451	ns
Interleukin 8 (pg/ml)	9	28	212	14.9	12.8	-10.1636	13.1532	185.833	-0.77271	0.44068	0.62451	ns
Interleukin 8 (pg/ml)	12	23	212	11.6	25.25	-0.822866	13.9118	188.36	-0.0591489	0.9529	0.9529	ns
Interleukin 8 (pg/ml)	15	21	212	14.9	22.7	12.5952	14.304	188.673	0.880538	0.37969	0.62451	ns
Interleukin 8 (pg/ml)	18	21	212	16.4	11.8	-1.28504	14.3495	189.415	-0.0895534	0.92874	0.9529	ns
Interleukin 8 (pg/ml)	21	22	212	12.65	25.775	10.5983	14.1311	189.241	0.749995	0.45419	0.62451	ns
Interleukin 8 (pg/ml)	24	16	212	16	15.625	-12.9644	15.6344	191.242	-0.829226	0.40801	0.62451	ns
Interleukin 8 (pg/ml)	sex	212				7.48961	8.38541	33.855	0.893172	0.37807	0.62451	ns
Interleukin 8 (pg/ml)	age_y	212				-0.162542	0.314559	37.6967	-0.516731	0.60836	0.74355	ns
Calprotectin (mg/g)	Baseline (Intercept)	18	120	147	164.5	178.77	25.9978	50.5752	6.87637	0	0	***
Calprotectin (mg/g)	3	9	120	56	57	-117.301	34.9876	104.568	-3.35265	0.00112	0.00153	**
Calprotectin (mg/g)	6	14	120	61	59.5	-106.292	30.2902	97.2022	-3.50914	0.00068	0.00107	**
Calprotectin (mg/g)	9	15	120	79	70	-88.1664	30.03	92.3242	-2.93594	0.0042	0.00513	**
Calprotectin (mg/g)	12	11	120	64	32	-126.682	32.8491	97.5959	-3.85649	0.00021	0.00038	***
Calprotectin (mg/g)	15	11	120	40	24.5	-139.752	33.0813	97.1794	-4.2245	5e-05	0.00012	***
Calprotectin (mg/g)	18	12	120	21	31	-143.649	32.1673	105.832	-4.46568	2e-05	6e-05	***
Calprotectin (mg/g)	21	16	120	34.5	31.75	-159.005	29.5172	99.2081	-5.38687	0	0	***
Calprotectin (mg/g)	24	14	120	22	32.75	-164.862	30.9167	100.49	-5.33245	0	0	***
Calprotectin (mg/g)	sex	120				-12.0108	18.4637	19.3052	-0.650507	0.52303	0.52303	ns
Calprotectin (mg/g)	age_y	120				0.917424	0.659194	17.7606	1.39174	0.18119	0.19931	ns
GPT/ALAT (U/l)	Baseline (Intercept)	33	236	23	13	12.819	5.62363	44.6861	2.27949	0.02747	0.04316	*
GPT/ALAT (U/l)	3	30	236	32	19.5	11.6288	3.44783	195.468	3.37277	0.0009	0.00445	**
GPT/ALAT (U/l)	6	31	236	30	24	10.7105	3.4252	196.508	3.12698	0.00203	0.00559	**
GPT/ALAT (U/l)	9	31	236	30	20	7.96818	3.42613	196.563	2.32571	0.02105	0.0386	*
GPT/ALAT (U/l)	12	26	236	30.5	13.25	11.9048	3.62642	198.534	3.2828	0.00121	0.00445	**
GPT/ALAT (U/l)	15	23	236	31	28.5	9.49397	3.78394	199.083	2.50902	0.0129	0.02839	*
GPT/ALAT (U/l)	18	21	236	33	23	6.45256	3.90804	200.046	1.6511	0.10029	0.13789	ns
GPT/ALAT (U/l)	21	22	236	27.5	22.5	3.22299	3.84732	200.334	0.837721	0.40319	0.40319	ns
GPT/ALAT (U/l)	24	19	236	28	22.5	6.22674	4.07107	201.548	1.52951	0.12771	0.15608	ns
GPT/ALAT (U/l)	sex	236				18.2526	4.74348	32.2664	3.84794	0.00053	0.00445	**
GPT/ALAT (U/l)	age_y	236				0.165752	0.172353	33.2264	0.961701	0.34315	0.37746	ns
GOT/ASAT (U/l)	Baseline (Intercept)	33	236	27	9	27.0034	2.92795	42.0791	9.22263	0	0	***
GOT/ASAT (U/l)	3	30	236	31.5	15.5	3.13574	1.64872	194.826	1.90192	0.05866	0.21508	ns
GOT/ASAT (U/l)	6	31	236	31	12	2.7475	1.63857	195.893	1.67677	0.09518	0.26175	ns
GOT/ASAT (U/l)	9	31	236	29	14	1.62842	1.63904	195.97	0.993518	0.32168	0.58975	ns
GOT/ASAT (U/l)	12	26	236	28	13.5	1.7633	1.73574	197.8	1.01588	0.31093	0.58975	ns
GOT/ASAT (U/l)	15	22	236	30.5	11.75	1.4496	1.83813	198.492	0.788627	0.43127	0.593	ns
GOT/ASAT (U/l)	18	22	236	27	16.5	0.576089	1.84352	199.472	0.312494	0.75499	0.86463	ns
GOT/ASAT (U/l)	21	22	236	30.5	13.75	0.500844	1.84243	199.804	0.271839	0.78603	0.86463	ns
GOT/ASAT (U/l)	24	19	236	26	10	-0.0988094	1.95028	201.118	-0.0506643	0.95964	0.95964	ns
GOT/ASAT (U/l)	sex	236				9.71857	2.50478	32.0066	3.88001	0.00049	0.00269	**
GOT/ASAT (U/l)	age_y	236				-0.0800732	0.0909004	32.9095	-0.880889	0.38477	0.593	ns
HbA1c (%)	Baseline (Intercept)	16	123	5.75	0.975	5.9436	0.502217	39.1077	11.8347	0	0	***
HbA1c (%)	3	19	123	5.5	0.5	-0.620111	0.179915	83.3536	-3.44669	0.00089	0.0049	**
HbA1c (%)	6	12	123	5.4	0.375	-0.617234	0.228638	87.8914	-2.69961	0.00833	0.03053	*
HbA1c (%)	9	12	123	5.4	0.625	-0.503979	0.206071	83.8783	-2.44566	0.01655	0.03641	*
HbA1c (%)	12	11	123	5.5	1	-0.516283	0.209203	83.6085	-2.46786	0.01563	0.03641	*
HbA1c (%)	15	9	123	5.5	0.3	-0.415605	0.226803	83.736	-1.83245	0.07044	0.11069	ns
HbA1c (%)	18	10	123	5.4	0.425	-0.483495	0.213136	84.6985	-2.26848	0.02584	0.04738	*
HbA1c (%)	21	19	123	5.6	1.2	-0.290365	0.177916	85.6784	-1.63204	0.10634	0.14622	ns
HbA1c (%)	24	15	123	5.8	0.9	-0.0533455	0.186293	86.8612	-0.286352	0.77529	0.77529	ns
HbA1c (%)	sex	123				-0.321501	0.436523	32.2028	-0.736503	0.46676	0.51343	ns
HbA1c (%)	age_y	123				0.0231887	0.0158975	33.7867	1.45864	0.1539	0.1881	ns
CRP (mg/l)	Baseline (Intercept)	30	185	1.75	2.825	3.60835	1.87875	92.0233	1.92061	0.05788	0.21221	ns
CRP (mg/l)	3	19	185	0.57	1.155	-0.534712	2.12999	161.701	-0.25104	0.8021	0.8021	ns
CRP (mg/l)	6	22	185	0.385	0.54	-4.58757	2.03473	161.243	-2.25464	0.0255	0.21221	ns
CRP (mg/l)	9	22	185	0.695	0.745	-4.24723	2.04278	162.059	-2.07914	0.03918	0.21221	ns
CRP (mg/l)	12	24	185	0.695	1.49	-1.33586	1.98968	163.368	-0.671393	0.50292	0.61468	ns
CRP (mg/l)	15	19	185	0.62	1.25	-3.14956	2.13856	163.734	-1.47275	0.14274	0.26169	ns
CRP (mg/l)	18	17	185	0.95	1.06	-3.73802	2.24571	163.818	-1.66452	0.09792	0.24772	ns
CRP (mg/l)	21	17	185	1.8	4.98	-0.972885	2.21697	164.679	-0.438835	0.66136	0.72749	ns
CRP (mg/l)	24	15	185	0.6	5.16	-3.08377	2.33976	163.97	-1.31798	0.18935	0.29755	ns
CRP (mg/l)	sex	185				-1.23866	1.2858	34.9473	-0.96334	0.342	0.47024	ns
CRP (mg/l)	age_y	185				0.0799743	0.0493328	41.3103	1.62112	0.1126	0.24772	ns

## Sheet: Supp_data3
Supplementary Data 3: Results of stratified PERMANOVA of beta-diversity (BC_dist)
Sputum
Permutation test for adonis under reduced model
Marginal effects of terms
Blocks: strata
Permutation: free
Number of permutations: 999
adonis2(formula = BC_dist ~ visit_sum + sex + age_y, data = metadata, permutations = 999, by = "margin", strata = metadata$id)
	Df	SumOfSqs	R2	F	Pr(>F)	Signif.
visit_sum	4	1.69732	0.114597	1.80893	0.001	***
sex	1	0.582206	0.0393084	2.48196	0.002	**
age_y	1	0.592107	0.0399769	2.52417	0.648
Residual	50	11.7288	0.791883	NA	NA
Total	56	14.8112	1
Throat
Permutation test for adonis under reduced model
Marginal effects of terms
Blocks: strata
Permutation: free
Number of permutations: 999
adonis2(formula = BC_dist ~ visit_sum + sex + age_y, data = metadata, permutations = 999, by = "margin", strata = metadata$id)
	Df	SumOfSqs	R2	F	Pr(>F)	Signif.
visit_sum	4	0.866663	0.0163984	0.921289	0.018	*
sex	1	1.16453	0.0220345	4.95174	0.158
age_y	1	2.23882	0.0423613	9.51974	0.334
Residual	206	48.4464	0.916667
Total	212	52.8506	1
Stool
Permutation test for adonis under reduced model
Marginal effects of terms
Blocks: strata
Permutation: free
Number of permutations: 999
adonis2(formula = BC_dist ~ visit_sum + sex + age_y, data = metadata, permutations = 999, by = "margin", strata = metadata$id)
Df SumOfSqs R2 F Pr(>F)	Df	SumOfSqs	R2	F	Pr(>F)	Signif.
visit_sum	4	1.38696	0.0229116	1.22151	0.001	***
sex	1	0.935163	0.0154483	3.29443	0.092	.
age_y	1	1.76358	0.0291332	6.21282	0.002	**
Residual	199	56.4885	0.933152
Total	205	60.5351	1
---
Signif. codes: 0 ‘***’ 0.001 ‘**’ 0.01 ‘*’ 0.05 ‘.’ 0.1 ‘ ’ 1

## Sheet: Supp_data4
Supplementary Data 4: Linear mixed model result for diversity estimates
Unrarefied											Rarefied to minimum sequencing depth
Sample	alpha_diversity	Months_after_ETI_start	Estimate	Std..Error	df	t.value	p	fdr	p_star	fdr_star	Sample	alpha_diversity	Months_after_ETI_start	Estimate	Std..Error	df	t.value	p	fdr	p_star	fdr_star
Sputum unrarefied	Shannon Index	Baseline (Intercept)	2.74691555379923	0.32234471861917602	17.979932347540799	8.5216707305339501	0	0	***	***	Sputum rarefied	Shannon Index	Baseline (Intercept)	2.7495760806969098	0.32198624835464201	18.089905726176699	8.5394208440494594	0	0	***	***
Sputum unrarefied	Shannon Index	3	0.384576903065452	0.230755428028841	40.826981645002597	1.6665995957303501	0.10324999999999999	0.14455000000000001	ns	ns	Sputum rarefied	Shannon Index	3	0.39154492408717101	0.232539114016836	40.9778961564203	1.6837809232335099	9.9830000000000002E-2	0.13976	.	ns
Sputum unrarefied	Shannon Index	45089	0.68497052817648696	0.20145874748411899	44.511360442001298	3.4000535431229202	1.4300000000000001E-3	5.0099999999999997E-3	**	**	Sputum rarefied	Shannon Index	45089	0.68408244214382796	0.20289311552948699	44.698912296018001	3.3716394977650501	1.5499999999999999E-3	5.4299999999999999E-3	**	**
Sputum unrarefied	Shannon Index	15-18	0.51468707654016899	0.22760043671431801	42.048091378593298	2.2613624295729999	2.8969999999999999E-2	5.8520000000000003E-2	*	.	Sputum rarefied	Shannon Index	15-18	0.5204448674587	0.229315397845268	42.220722871875601	2.2695591850743102	2.8400000000000002E-2	5.9240000000000001E-2	*	.
Sputum unrarefied	Shannon Index	21-24	0.48884358920913901	0.222582206932222	43.580302142552	2.1962383963512102	3.3439999999999998E-2	5.8520000000000003E-2	*	.	Sputum rarefied	Shannon Index	21-24	0.49116756214893798	0.224204499280557	43.684528511830102	2.1907123350558502	3.3849999999999998E-2	5.9240000000000001E-2	*	.
Sputum unrarefied	Shannon Index	age_y	-1.4231008867783401E-2	1.0583505041332601E-2	17.228355126365699	-1.3446404392690301	0.19617999999999999	0.22886999999999999	ns	ns	Sputum rarefied	Shannon Index	age_y	-1.44853192899842E-2	1.0569414966570099E-2	17.3257928038899	-1.37049395220072	0.18803	0.21937000000000001	ns	ns
Sputum unrarefied	Shannon Index	sex	4.6830069503638598E-2	0.23332811940332401	13.358058981339701	0.20070478270426301	0.84394999999999998	0.84394999999999998	ns	ns	Sputum rarefied	Shannon Index	sex	4.8205041888088898E-2	0.23269966628257699	13.375872575496199	0.20715561246035999	0.83901000000000003	0.83901000000000003	ns	ns
Sputum unrarefied	Observed ASVs	Baseline (Intercept)	79.7744866985594	10.8251954701404	14.601457812459699	7.3693345232060201	0	2.0000000000000002E-5	***	***	Sputum rarefied	Observed ASVs	Baseline (Intercept)	77.437139865339503	10.7028063653615	15.246217567596799	7.2352182429419596	0	2.0000000000000002E-5	***	***
Sputum unrarefied	Observed ASVs	3	11.3822482965096	8.7042324877318293	39.604610016095002	1.3076682306627601	0.19853000000000001	0.23161000000000001	ns	ns	Sputum rarefied	Observed ASVs	3	11.2843044215311	8.2658129814707095	39.653888053241303	1.36517780487253	0.17988999999999999	0.20987	ns	ns
Sputum unrarefied	Observed ASVs	45089	27.635041362332	7.5296210692543699	45.284051661343398	3.6701769064015499	6.4000000000000005E-4	1.1100000000000001E-3	***	**	Sputum rarefied	Observed ASVs	45089	26.755414502175601	7.1754701831292502	44.7043069909137	3.7287332842776002	5.4000000000000001E-4	9.3999999999999997E-4	***	***
Sputum unrarefied	Observed ASVs	15-18	32.428919915998897	8.5589735998772092	41.701202855166002	3.7888795353293498	4.8000000000000001E-4	1.1100000000000001E-3	***	**	Sputum rarefied	Observed ASVs	15-18	31.935394861820299	8.1376448991501196	41.433356869541299	3.9244026075843501	3.2000000000000003E-4	7.5000000000000002E-4	***	***
Sputum unrarefied	Observed ASVs	21-24	39.471967376686202	8.35032924083559	42.409778255096597	4.7269953361427399	3.0000000000000001E-5	9.0000000000000006E-5	***	***	Sputum rarefied	Observed ASVs	21-24	37.509474924337603	7.9440056034064401	42.566343686136896	4.7217331906529996	3.0000000000000001E-5	9.0000000000000006E-5	***	***
Sputum unrarefied	Observed ASVs	age_y	-0.96094545305286605	0.35424558476935603	13.6960265124297	-2.7126532958160099	1.7100000000000001E-2	2.3939999999999999E-2	*	*	Sputum rarefied	Observed ASVs	age_y	-0.933293853845928	0.35068947413179402	14.4363132419571	-2.6613112816017401	1.8239999999999999E-2	0.02553	*	*
Sputum unrarefied	Observed ASVs	sex	0.28434665209750398	7.6494521145311998	9.5481320223448698	3.7172159239659497E-2	0.97111000000000003	0.97111000000000003	ns	ns	Sputum rarefied	Observed ASVs	sex	1.1308973964582301	7.6329528700930096	10.447794640473299	0.14815988198869301	0.88504000000000005	0.88504000000000005	ns	ns
Sputum unrarefied	Pielou Index	Baseline (Intercept)	0.62397857136233903	6.1198552509486297E-2	19.207593868601101	10.1959694433233	0	0	***	***	Sputum rarefied	Pielou Index	Baseline (Intercept)	0.62755880345549697	6.0695456448359303E-2	19.393275218259799	10.339469215285201	0	0	***	***
Sputum unrarefied	Pielou Index	3	6.9144868022214895E-2	4.8402063580884801E-2	42.458663073017	1.42855206796435	0.16045000000000001	0.37437999999999999	ns	ns	Sputum rarefied	Pielou Index	3	7.1388462843251094E-2	4.8488387685055999E-2	42.646470167046402	1.47227957561585	0.14829000000000001	0.34599999999999997	ns	ns
Sputum unrarefied	Pielou Index	45089	9.6574187479903997E-2	4.1932386394942102E-2	46.522715188253798	2.3030930453209901	2.579E-2	9.0279999999999999E-2	*	.	Sputum rarefied	Pielou Index	45089	9.6457195263401699E-2	4.1969709275505598E-2	46.726457167248803	2.2982574082231202	2.6069999999999999E-2	9.1240000000000002E-2	*	.
Sputum unrarefied	Pielou Index	15-18	4.2365980366307399E-2	4.7618744590610697E-2	43.963923849161802	0.88969124932917698	0.37846999999999997	0.66232999999999997	ns	ns	Sputum rarefied	Pielou Index	15-18	4.4545308744603503E-2	4.7688969362999697E-2	44.179053754484897	0.934079921197976	0.35533999999999999	0.62185000000000001	ns	ns
Sputum unrarefied	Pielou Index	21-24	2.9099873487370899E-2	4.6467665161002203E-2	44.6383725133037	0.62623920066878902	0.53434999999999999	0.74809000000000003	ns	ns	Sputum rarefied	Pielou Index	21-24	3.25580760398494E-2	4.6529985661010201E-2	44.755576677638402	0.69972246020121598	0.48771999999999999	0.68281000000000003	ns	ns
Sputum unrarefied	Pielou Index	age_y	-8.64649063978796E-4	2.0037705099187602E-3	18.225730003915402	-0.43151102369195399	0.67115999999999998	0.78302000000000005	ns	ns	Sputum rarefied	Pielou Index	age_y	-9.2674547633335902E-4	1.9866446582599701E-3	18.3707325024012	-0.46648779009380398	0.64634999999999998	0.75407999999999997	ns	ns
Sputum unrarefied	Pielou Index	sex	1.0665582782366701E-2	4.3414116683112E-2	13.3673481785493	0.24567084619541801	0.80967	0.80967	ns	ns	Sputum rarefied	Pielou Index	sex	1.0628329278044701E-2	4.29561778240573E-2	13.391645159627	0.247422601740241	0.80832999999999999	0.80832999999999999	ns	ns
Sputum unrarefied	Berger Parker Index	Baseline (Intercept)	0.33865094501649301	7.9467927956018203E-2	23.6158670563611	4.2614794889822702	2.7999999999999998E-4	1.9599999999999999E-3	***	**	Sputum rarefied	Berger Parker Index	Baseline (Intercept)	0.33694706188545098	7.9334055543029997E-2	24.035043297024501	4.2471932082520896	2.7999999999999998E-4	1.97E-3	***	**
Sputum unrarefied	Berger Parker Index	3	-9.2236879716325104E-2	7.5089587668135505E-2	45.585569121655702	-1.2283577867543101	0.22561999999999999	0.52644000000000002	ns	ns	Sputum rarefied	Berger Parker Index	3	-9.3457267877159397E-2	7.5402369222131893E-2	45.745505964824602	-1.2394473653982701	0.2215	0.51683999999999997	ns	ns
Sputum unrarefied	Berger Parker Index	45089	-0.141471157562049	6.3749129503887003E-2	49.417927431811101	-2.2191857153660899	3.1099999999999999E-2	0.10883	*	ns	Sputum rarefied	Berger Parker Index	45089	-0.14229876272299999	6.3958712220924599E-2	49.488973982130403	-2.22485346846064	3.0679999999999999E-2	0.10738	*	ns
Sputum unrarefied	Berger Parker Index	15-18	-6.1035961453385197E-2	7.3307514702786195E-2	47.552783265771303	-0.83260170121502397	0.40922999999999998	0.57291999999999998	ns	ns	Sputum rarefied	Berger Parker Index	15-18	-6.3111598854481796E-2	7.3585991487962396E-2	47.696950774995301	-0.85765779027120803	0.39537	0.55352000000000001	ns	ns
Sputum unrarefied	Berger Parker Index	21-24	-6.5657094985741293E-2	7.1623654448730895E-2	46.496383382390697	-0.91669568512088995	0.36403000000000002	0.57291999999999998	ns	ns	Sputum rarefied	Berger Parker Index	21-24	-6.6226156124242597E-2	7.1910886092389895E-2	46.6048676867537	-0.92094757446259801	0.36181999999999997	0.55352000000000001	ns	ns
Sputum unrarefied	Berger Parker Index	age_y	1.13807576964113E-3	2.5765554700045001E-3	20.702866992619601	0.44170435408446501	0.66327999999999998	0.77383000000000002	ns	ns	Sputum rarefied	Berger Parker Index	age_y	1.1926010550251101E-3	2.5707239093399402E-3	20.982867715239301	0.46391642863403598	0.64748000000000006	0.75539999999999996	ns	ns
Sputum unrarefied	Berger Parker Index	sex	-8.56275847329348E-5	5.32485684165128E-2	13.057851640587	-1.6080729919939201E-3	0.99873999999999996	0.99873999999999996	ns	ns	Sputum rarefied	Berger Parker Index	sex	-3.1203413473737597E-4	5.3015059587164501E-2	13.1740194059487	-5.8857641049020496E-3	0.99539	0.99539	ns	ns
Throat unrarefied	Shannon Index	Baseline (Intercept)	3.33859930953526	0.14496698317534701	97.512978939429203	23.0300668221604	0	0	***	***	Throat rarefied	Shannon Index	Baseline (Intercept)	3.3300067802572602	0.145132718325585	97.545992246116896	22.9445628709774	0	0	***	***
Throat unrarefied	Shannon Index	3	2.09500609982224E-2	9.7128976384212903E-2	182.238085522056	0.21569321306702799	0.82947000000000004	0.82947000000000004	ns	ns	Throat rarefied	Shannon Index	3	1.6191392269865899E-2	9.7271268555604307E-2	182.25717802207501	0.16645606159243501	0.86797999999999997	0.86797999999999997	ns	ns
Throat unrarefied	Shannon Index	45089	1.99638060982044E-2	8.6127939571010406E-2	191.70365789736601	0.231792449670119	0.81694999999999995	0.82947000000000004	ns	ns	Throat rarefied	Shannon Index	45089	2.0120437685652599E-2	8.6253197469206802E-2	191.727450531839	0.23327178905843801	0.81579999999999997	0.86797999999999997	ns	ns
Throat unrarefied	Shannon Index	15-18	6.3374825949623306E-2	9.5723874502912101E-2	194.14982997513701	0.66205872128269705	0.50871999999999995	0.82947000000000004	ns	ns	Throat rarefied	Shannon Index	15-18	6.3104290735987306E-2	9.5862822381909005E-2	194.17461319438999	0.65827699589925803	0.51114000000000004	0.86797999999999997	ns	ns
Throat unrarefied	Shannon Index	21-24	-5.6891434606510097E-2	9.7295799461076998E-2	195.21764878507699	-0.58472652387495305	0.55940999999999996	0.82947000000000004	ns	ns	Throat rarefied	Shannon Index	21-24	-5.53245943603397E-2	9.7436910811137006E-2	195.24191143201301	-0.56779914202715098	0.57081999999999999	0.86797999999999997	ns	ns
Throat unrarefied	Shannon Index	Control	0.115997779269275	0.12652302200305601	146.621126479906	0.91681163975417101	0.36075000000000002	0.82947000000000004	ns	ns	Throat rarefied	Shannon Index	Control	0.115658081733734	0.126676920208182	146.69500380647099	0.91301621119032905	0.36273	0.86797999999999997	ns	ns
Throat unrarefied	Shannon Index	age_y	-6.8605798843013399E-3	3.9537780227997203E-3	65.979875198330205	-1.7351960187798401	8.7370000000000003E-2	0.34949999999999998	.	ns	Throat rarefied	Shannon Index	age_y	-6.7705990689291796E-3	3.9580047918490796E-3	65.984990282921899	-1.71060911368076	9.1850000000000001E-2	0.36741000000000001	.	ns
Throat unrarefied	Shannon Index	sex	-2.3891554538975901E-2	0.103984257242648	67.475695095289296	-0.22976126552719101	0.81896999999999998	0.82947000000000004	ns	ns	Throat rarefied	Shannon Index	sex	-2.3446752744231102E-2	0.104095886602271	67.481890844756194	-0.225241875635452	0.82247000000000003	0.86797999999999997	ns	ns
Throat unrarefied	Observed ASVs	Baseline (Intercept)	90.787767870307306	8.9229904137027702	96.417324581027898	10.174589869657	0	0	***	***	Throat rarefied	Observed ASVs	Baseline (Intercept)	84.236448642732597	7.8429815111116703	96.330976510458996	10.7403604768657	0	0	***	***
Throat unrarefied	Observed ASVs	3	6.8791187407570602	6.4242216423192398	179.77120800402199	1.07080968306591	0.28569	0.45710000000000001	ns	ns	Throat rarefied	Observed ASVs	3	6.1649662580029903	5.3996604895815903	180.70349913810099	1.1417322014778499	0.25507999999999997	0.38622000000000001	ns	ns
Throat unrarefied	Observed ASVs	45089	4.35328927861877	5.6818012131919797	191.225366213282	0.76618120122036704	0.44451000000000002	0.50802000000000003	ns	ns	Throat rarefied	Observed ASVs	45089	5.0793260913247202	4.7836315429903697	190.94171819514401	1.06181382192105	0.28965999999999997	0.38622000000000001	ns	ns
Throat unrarefied	Observed ASVs	15-18	9.2497340044698095	6.31055672148337	194.216687134745	1.4657556239024701	0.14433000000000001	0.28866000000000003	ns	ns	Throat rarefied	Observed ASVs	15-18	7.0706901382579597	5.3153136951899196	193.58496521399101	1.3302488891025499	0.185	0.37	ns	ns
Throat unrarefied	Observed ASVs	21-24	-1.4582406210724701	6.4124587215851703	195.29281140937599	-0.22740740866897899	0.82033999999999996	0.82033999999999996	ns	ns	Throat rarefied	Observed ASVs	21-24	-0.35352823039546499	5.4020473536989	194.656151770549	-6.5443378639285094E-2	0.94789000000000001	0.94789000000000001	ns	ns
Throat unrarefied	Observed ASVs	Control	19.9796264362259	7.92615745819068	155.65998931059301	2.5207203542972101	1.272E-2	5.0869999999999999E-2	*	.	Throat rarefied	Observed ASVs	Control	18.072336341073001	6.8887573558595996	149.038804740769	2.6234537533392199	9.6100000000000005E-3	3.8440000000000002E-2	**	*
Throat unrarefied	Observed ASVs	age_y	-0.38515250467979001	0.23893646628132201	59.821579164636198	-1.6119452617429799	0.11224000000000001	0.28866000000000003	ns	ns	Throat rarefied	Observed ASVs	age_y	-0.36036603410542101	0.21251887825874299	63.112731473493398	-1.6956895173645301	9.4869999999999996E-2	0.25298999999999999	.	ns
Throat unrarefied	Observed ASVs	sex	-5.3845116956436101	6.2908930838387196	61.396972387373303	-0.85592166706447503	0.39537	0.50802000000000003	ns	ns	Throat rarefied	Observed ASVs	sex	-3.8979315701336499	5.5914312240127098	64.644815395992794	-0.69712590819212295	0.48821999999999999	0.55796999999999997	ns	ns
Throat unrarefied	Pielou Index	Baseline (Intercept)	0.74346517269836598	2.2529146524807898E-2	103.49262734928099	33.000148136091099	0	0	***	***	Throat rarefied	Pielou Index	Baseline (Intercept)	0.75163618085297201	2.2385163947327098E-2	101.587919976107	33.577425772783698	0	0	***	***
Throat unrarefied	Pielou Index	3	-7.1928916885825502E-3	1.92714740705692E-2	181.568467595789	-0.37324034800053502	0.70940000000000003	0.99224999999999997	ns	ns	Throat rarefied	Pielou Index	3	-6.8634296487348296E-3	1.8996305351950401E-2	180.242293665733	-0.36130339671709399	0.71830000000000005	0.95032000000000005	ns	ns
Throat unrarefied	Pielou Index	45089	-2.7232018425242402E-4	1.6900282934927E-2	198.247028556565	-1.6113350604896201E-2	0.98716000000000004	0.99224999999999997	ns	ns	Throat rarefied	Pielou Index	45089	-1.03966069436778E-3	1.6666928894151899E-2	196.88101191556399	-6.2378660218114598E-2	0.95032000000000005	0.95032000000000005	ns	ns
Throat unrarefied	Pielou Index	15-18	2.083317422893E-3	1.8724361253566201E-2	203.559237579149	0.111262402742641	0.91152	0.99224999999999997	ns	ns	Throat rarefied	Pielou Index	15-18	4.0158511033177103E-3	1.8468683975629799E-2	202.11665545899399	0.21744110780263401	0.82808000000000004	0.95032000000000005	ns	ns
Throat unrarefied	Pielou Index	21-24	-5.1574672732044597E-3	1.9012700807388899E-2	204.97006856736499	-0.271264315651572	0.78646000000000005	0.99224999999999997	ns	ns	Throat rarefied	Pielou Index	21-24	-6.2532747567043299E-3	1.87538723386385E-2	203.51650117102201	-0.33343912360012701	0.73914999999999997	0.95032000000000005	ns	ns
Throat unrarefied	Pielou Index	Control	-1.20834667340819E-2	2.1132366163107898E-2	193.53113594428501	-0.57179904232289902	0.56811999999999996	0.99224999999999997	ns	ns	Throat rarefied	Pielou Index	Control	-1.1985437311521701E-2	2.0935355196855101E-2	190.543575780569	-0.57249744266685099	0.56766000000000005	0.95032000000000005	ns	ns
Throat unrarefied	Pielou Index	age_y	-4.3264919883567201E-4	5.6595834915480303E-4	48.380663550953599	-0.76445413250248195	0.44830999999999999	0.99224999999999997	ns	ns	Throat rarefied	Pielou Index	age_y	-3.9200408579851602E-4	5.6447991030410304E-4	48.039691978926001	-0.69445179295633597	0.49074000000000001	0.95032000000000005	ns	ns
Throat unrarefied	Pielou Index	sex	1.4585940950766999E-4	1.4946612434103701E-2	49.559166968055997	9.7586934933070503E-3	0.99224999999999997	0.99224999999999997	ns	ns	Throat rarefied	Pielou Index	sex	-1.40922579926507E-3	1.4905511965368301E-2	49.245724820237001	-9.4543938010267295E-2	0.92505999999999999	0.95032000000000005	ns	ns
Throat unrarefied	Berger Parker Index	Baseline (Intercept)	0.15548935548463499	2.56107886039539E-2	116.044491418446	6.0712443450737901	0	0	***	***	Throat rarefied	Berger Parker Index	Baseline (Intercept)	0.15526485492966399	2.5776889382191099E-2	117.154764703773	6.0234131678019498	0	0	***	***
Throat unrarefied	Berger Parker Index	3	2.5015736191927401E-2	2.3098334241368399E-2	189.71456012193599	1.0830103993873701	0.28017999999999998	0.61034999999999995	ns	ns	Throat rarefied	Berger Parker Index	3	2.46485430144067E-2	2.33159321101571E-2	190.42459396715699	1.05715451983449	0.29177999999999998	0.63070999999999999	ns	ns
Throat unrarefied	Berger Parker Index	45089	1.53437032212092E-2	2.01871816211452E-2	206.52578063082501	0.760071589445519	0.44807999999999998	0.61034999999999995	ns	ns	Throat rarefied	Berger Parker Index	45089	1.46777786834649E-2	2.0373262644171101E-2	207.162451444509	0.72044320734579803	0.47205999999999998	0.63070999999999999	ns	ns
Throat unrarefied	Berger Parker Index	15-18	-3.5940186760562601E-3	2.23394783394548E-2	212.39613763823201	-0.16088194278505899	0.87234	0.94711999999999996	ns	ns	Throat rarefied	Berger Parker Index	15-18	-3.31688866843247E-3	2.25437206951104E-2	213.03640341431	-0.14713137699367701	0.88317000000000001	0.94776000000000005	ns	ns
Throat unrarefied	Berger Parker Index	21-24	3.6998436415521502E-2	2.2676286371884499E-2	213.91766232698899	1.63159151409353	0.10424	0.41694999999999999	ns	ns	Throat rarefied	Berger Parker Index	21-24	3.6620449049941897E-2	2.2883153148594099E-2	214.557928615669	1.60032355734121	0.111	0.44399	ns	ns
Throat unrarefied	Berger Parker Index	Control	1.8247041951585798E-2	2.4528692060719701E-2	211.23688150109899	0.74390603079919904	0.45776	0.61034999999999995	ns	ns	Throat rarefied	Berger Parker Index	Control	1.7767935455160699E-2	2.4717638437615298E-2	212.28983220610999	0.71883628769815899	0.47303000000000001	0.63070999999999999	ns	ns
Throat unrarefied	Berger Parker Index	age_y	5.84260354724404E-4	6.2555167541201398E-4	49.820842320052002	0.93399215075171105	0.35481000000000001	0.61034999999999995	ns	ns	Throat rarefied	Berger Parker Index	age_y	6.0035356458444298E-4	6.2853493518105004E-4	50.133200433412803	0.95516339821510599	0.34408	0.63070999999999999	ns	ns
Throat unrarefied	Berger Parker Index	sex	1.10199920708267E-3	1.6534146246771599E-2	50.704564022201403	6.6649900795321904E-2	0.94711999999999996	0.94711999999999996	ns	ns	Throat rarefied	Berger Parker Index	sex	1.0938545375141001E-3	1.66136544195651E-2	50.998340534087703	6.5840694039351597E-2	0.94776000000000005	0.94776000000000005	ns	ns
Stool unrarefied	Shannon Index	Baseline (Intercept)	3.3758665030109598	9.2058141887744804E-2	94.098406637371497	36.6710258732734	0	0	***	***	Stool rarefied	Shannon Index	Baseline (Intercept)	3.3741387616418099	9.1814105118998596E-2	94.853198057004803	36.749677593313599	0	0	***	***
Stool unrarefied	Shannon Index	3	-5.5095951871171098E-2	7.5000732763799705E-2	189.20069378183101	-0.734605514384574	0.46349000000000001	0.74158000000000002	ns	ns	Stool rarefied	Shannon Index	3	-5.28545704077499E-2	7.5196304861371702E-2	189.84081233125201	-0.70288786803008496	0.48298999999999997	0.77278000000000002	ns	ns
Stool unrarefied	Shannon Index	45089	2.0550595960486098E-2	5.95382020482004E-2	190.719226546275	0.34516655279326203	0.73035000000000005	0.86473	ns	ns	Stool rarefied	Shannon Index	45089	2.0344777640963201E-2	5.9691757152693703E-2	191.34931770399299	0.34083060394621201	0.73360999999999998	0.88675000000000004	ns	ns
Stool unrarefied	Shannon Index	15-18	1.1742178695025401E-2	6.8835348185467798E-2	196.411117192067	0.17058355924034299	0.86473	0.86473	ns	ns	Stool rarefied	Shannon Index	15-18	9.8405203472251099E-3	6.9005422685549003E-2	197.07989290062099	0.14260502963756	0.88675000000000004	0.88675000000000004	ns	ns
Stool unrarefied	Shannon Index	21-24	5.9360552782410099E-2	7.4430916156640395E-2	197.06801381227299	0.79752548870264295	0.42610999999999999	0.74158000000000002	ns	ns	Stool rarefied	Shannon Index	21-24	6.0517328064222803E-2	7.4613873652209395E-2	197.745965040871	0.81107339831070202	0.41830000000000001	0.77278000000000002	ns	ns
Stool unrarefied	Shannon Index	Control	0.61381464029559996	8.1031846400806296E-2	161.184908101113	7.57498030168904	0	0	***	***	Stool rarefied	Shannon Index	Control	0.606420440996566	8.0947348909223102E-2	162.86414433757699	7.4915417140668099	0	0	***	***
Stool unrarefied	Shannon Index	age_y	-5.3018769488510898E-4	2.4863892253905498E-3	65.215979556187094	-0.213236000812314	0.83181000000000005	0.86473	ns	ns	Stool rarefied	Shannon Index	age_y	-6.8059504333318295E-4	2.47691168432204E-3	65.437219711824795	-0.274775660206661	0.78434999999999999	0.88675000000000004	ns	ns
Stool unrarefied	Shannon Index	sex	0.10519639985627501	6.6572979473579902E-2	69.233604791077397	1.5801666184705401	0.11863	0.31634000000000001	ns	ns	Stool rarefied	Shannon Index	sex	0.103477336510207	6.6332315978363296E-2	69.497729706658902	1.5599837723736401	0.12331	0.32882	ns	ns
Stool unrarefied	Observed ASVs	Baseline (Intercept)	73.5439416732372	17.3101965079453	72.477039259014205	4.2485908025065102	6.0000000000000002E-5	2.5000000000000001E-4	***	***	Stool rarefied	Observed ASVs	Baseline (Intercept)	73.838359833576405	11.840150796776101	69.680774927395007	6.2362685324650604	0	0	***	***
Stool unrarefied	Observed ASVs	3	-1.83563933910481	5.0083866472058203	164.12085035791901	-0.36651310460004499	0.71445000000000003	0.79576000000000002	ns	ns	Stool rarefied	Observed ASVs	3	-1.4533359844085401	4.5345304743985304	161.703744654975	-0.32050418287271898	0.749	0.84613000000000005	ns	ns
Stool unrarefied	Observed ASVs	45089	-1.0366961935886501	3.9988823695197002	167.02699565258001	-0.25924648384022603	0.79576000000000002	0.79576000000000002	ns	ns	Stool rarefied	Observed ASVs	45089	-0.96353522613155196	3.6134813426127499	163.73160820478	-0.26665011792612697	0.79007000000000005	0.84613000000000005	ns	ns
Stool unrarefied	Observed ASVs	15-18	13.763184430556599	4.6774187571169499	171.925635646296	2.94247428875493	3.7100000000000002E-3	7.4099999999999999E-3	**	**	Stool rarefied	Observed ASVs	15-18	10.3953067244188	4.2129133816242197	167.13211546880001	2.46748645955096	1.461E-2	2.9229999999999999E-2	*	*
Stool unrarefied	Observed ASVs	21-24	18.1285077675605	5.0842607414507102	176.28368231771	3.5656133092788198	4.6999999999999999E-4	1.25E-3	***	**	Stool rarefied	Observed ASVs	21-24	12.754713779169601	4.5671163723253603	169.63102851235101	2.79272800151477	5.8300000000000001E-3	1.554E-2	**	*
Stool unrarefied	Observed ASVs	Control	96.247264847543903	13.553676458928701	75.751325812315699	7.1011924431868296	0	0	***	***	Stool rarefied	Observed ASVs	Control	76.957120222877094	9.3609882799625499	77.366168132705994	8.2210465306965403	0	0	***	***
Stool unrarefied	Observed ASVs	age_y	0.13508652009512001	0.500140848609542	71.568350998003496	0.270096954629238	0.78786	0.79576000000000002	ns	ns	Stool rarefied	Observed ASVs	age_y	6.6390148309419805E-2	0.340783203752692	66.551765179265004	0.19481637468728999	0.84613000000000005	0.84613000000000005	ns	ns
Stool unrarefied	Observed ASVs	sex	21.854734834053598	13.2829332454266	69.722883814503106	1.6453244498219699	0.10440000000000001	0.16705	ns	ns	Stool rarefied	Observed ASVs	sex	18.3333148003905	9.0312771992905905	66.187175223953503	2.0299803002205099	4.6379999999999998E-2	7.4209999999999998E-2	*	.
Stool unrarefied	Pielou Index	Baseline (Intercept)	0.762177767689593	1.1830557871346001E-2	109.94974815758999	64.4244993328346	0	0	***	***	Stool rarefied	Pielou Index	Baseline (Intercept)	0.76833350062511696	1.13445037520123E-2	115.031998285163	67.727378598541904	0	0	***	***
Stool unrarefied	Pielou Index	3	-1.05499448157227E-2	1.1457023654975701E-2	202.61351724057801	-0.92082770651703305	0.35824	0.57318000000000002	ns	ns	Stool rarefied	Pielou Index	3	-1.0848782852706801E-2	1.0932283199076701E-2	205.282249134301	-0.99236203958045199	0.32218999999999998	0.51549999999999996	ns	ns
Stool unrarefied	Pielou Index	45089	3.7221209106426899E-3	9.0865140215803906E-3	203.82030382690499	0.40963133956572201	0.68250999999999995	0.68250999999999995	ns	ns	Stool rarefied	Pielou Index	45089	3.93189891695835E-3	8.6705671116204391E-3	206.42840666391299	0.45347655653212698	0.65068000000000004	0.74363999999999997	ns	ns
Stool unrarefied	Pielou Index	15-18	-2.3107945513422701E-2	1.04568333528134E-2	211.67732393719999	-2.20984161588511	2.819E-2	0.11275	*	ns	Stool rarefied	Pielou Index	15-18	-1.8764903528574101E-2	9.9798551441767601E-3	213.71760727495399	-1.8802781460734399	6.1429999999999998E-2	0.16381000000000001	.	ns
Stool unrarefied	Pielou Index	21-24	-1.9206123853086302E-2	1.12989274006421E-2	213.17278668199799	-1.6998183254097901	9.0620000000000006E-2	0.24166000000000001	.	ns	Stool rarefied	Pielou Index	21-24	-1.15718581397403E-2	1.07838963274835E-2	215.07479250973799	-1.07306837791537	0.28444000000000003	0.51549999999999996	ns	ns
Stool unrarefied	Pielou Index	Control	1.4482147715039501E-2	1.11035706760682E-2	207.598815955698	1.3042784287628399	0.19358	0.38717000000000001	ns	ns	Stool rarefied	Pielou Index	Control	2.30001344501298E-2	1.06242051651312E-2	209.14064630395501	2.16488048683552	3.1530000000000002E-2	0.12612000000000001	*	ns
Stool unrarefied	Pielou Index	age_y	1.3658132412734599E-4	3.0325154556084199E-4	60.765438876942198	0.45038954005905801	0.65403	0.68250999999999995	ns	ns	Stool rarefied	Pielou Index	age_y	8.7564774933343803E-5	2.9137332443242699E-4	65.313115618335701	0.300524336275166	0.76473000000000002	0.76473000000000002	ns	ns
Stool unrarefied	Pielou Index	sex	5.6008247589927097E-3	8.1837349833568003E-3	65.378659220741497	0.68438491353679798	0.49614999999999998	0.66152999999999995	ns	ns	Stool rarefied	Pielou Index	sex	5.0888747647475398E-3	7.8610986964291699E-3	70.1293306288172	0.64734904893880896	0.51951999999999998	0.69269000000000003	ns	ns
Stool unrarefied	Berger Parker Index	Baseline (Intercept)	0.14664761995338199	1.44948553257872E-2	112.895897443837	10.117218603243799	0	0	***	***	Stool rarefied	Berger Parker Index	Baseline (Intercept)	0.14508349354546801	1.46512507918124E-2	113.16766594583601	9.9024646842128199	0	0	***	***
Stool unrarefied	Berger Parker Index	3	2.1942654493786799E-2	1.2669950755304299E-2	202.43094747843099	1.7318658073394999	8.4820000000000007E-2	0.22619	.	ns	Stool rarefied	Berger Parker Index	3	2.1229274475769999E-2	1.28057033816949E-2	202.58139110483401	1.6577983920911501	9.8909999999999998E-2	0.26374999999999998	.	ns
Stool unrarefied	Berger Parker Index	45089	2.5927572828635202E-3	1.0054004764839201E-2	203.67804632696601	0.25788303700937898	0.79676000000000002	0.79676000000000002	ns	ns	Stool rarefied	Berger Parker Index	45089	2.8241259857836802E-3	1.01617328646886E-2	203.82474834349301	0.27791775511018801	0.78136000000000005	0.78136000000000005	ns	ns
Stool unrarefied	Berger Parker Index	15-18	4.2990792144453399E-3	1.16054516958799E-2	209.32198158566601	0.37043618181372201	0.71143000000000001	0.79676000000000002	ns	ns	Stool rarefied	Berger Parker Index	15-18	4.2606492617884599E-3	1.1729825414088501E-2	209.44976471269601	0.36323211227602997	0.71679999999999999	0.78136000000000005	ns	ns
Stool unrarefied	Berger Parker Index	21-24	-8.2398554459993407E-3	1.25463413490037E-2	210.074501880865	-0.65675364768021605	0.51205999999999996	0.79676000000000002	ns	ns	Stool rarefied	Berger Parker Index	21-24	-5.9114111032537503E-3	1.2680801661751199E-2	210.199514210742	-0.46617014136292301	0.64158000000000004	0.78136000000000005	ns	ns
Stool unrarefied	Berger Parker Index	Control	-5.4959776222019398E-2	1.30585353573782E-2	189.58164166509701	-4.2087243873767504	4.0000000000000003E-5	1.6000000000000001E-4	***	***	Stool rarefied	Berger Parker Index	Control	-5.3729046191359799E-2	1.31990830716092E-2	189.755238362634	-4.0706650530088098	6.9999999999999994E-5	2.7999999999999998E-4	***	***
Stool unrarefied	Berger Parker Index	age_y	1.7627337369104101E-4	3.8470538988026598E-4	74.772261302598906	0.45820354569480698	0.64814000000000005	0.79676000000000002	ns	ns	Stool rarefied	Berger Parker Index	age_y	2.2532875445326601E-4	3.8886436240445399E-4	75.012790636961995	0.57945334218851297	0.56401999999999997	0.78136000000000005	ns	ns
Stool unrarefied	Berger Parker Index	sex	-5.1448154360973098E-3	1.03299354575833E-2	79.573203005372207	-0.498049136630416	0.61982000000000004	0.79676000000000002	ns	ns	Stool rarefied	Berger Parker Index	sex	-5.7187787391592398E-3	1.04415761786568E-2	79.821422503117304	-0.54769305335804896	0.58543000000000001	0.78136000000000005	ns	ns

## Sheet: Supp_data5
Supplementary Data 5: Statistical report for significant confounded and deconfounded associations between clinical and technical parameters and genera for sputum, throat and stool samples
Sample type	feature	metaVariable	Ps	Qs	Ds	status
Sputum	Alloprevotella	sex	3.3251492720905102E-3	2.18078135085297E-2	-0.45780051150895101	C: levofloxacin_inhal, interleukin8_pg_ml
Sputum	Lachnoanaerobaculum	sex	1.90337260840328E-3	1.9760682310776E-2	-0.48721227621483398	OK_sd
Sputum	Veillonella	sex	2.1651932422717302E-3	1.9760682310776E-2	-0.48337595907928399	OK_sd
Sputum	Atopobium	sex	1.47818124652347E-2	4.7644019550618602E-2	-0.38107416879795403	OK_sd
Sputum	Megasphaera	sex	6.62552785722403E-4	1.39136085001705E-2	-0.52813299232736599	OK_sd
Sputum	Campylobacter	sex	1.8262510549850301E-4	7.6702544309371103E-3	-0.58312020460358105	OK_sd
Sputum	Bergeyella	sex	5.1443409821883904E-3	2.7007790156488999E-2	-0.42838874680306899	C: acetylcystein, interleukin8_pg_ml
Sputum	Dialister	sex	6.05598705810964E-3	2.8251743227610999E-2	-0.38874680306905401	AD
Sputum	Scardovia	age_y	4.6518453001248501E-4	1.95377502605244E-2	0.448627435487501	C: levofloxacin_inhal
Sputum	TM7x	age_y	1.72761029061605E-3	3.08009915150959E-2	-0.40599716171901101	OK_sd
Sputum	Leptotrichia	age_y	1.27914894951708E-2	6.7155319849646705E-2	-0.32783956655202801	AD
Sputum	Alloprevotella	levofloxacin_inhal	7.5164999549210396E-4	2.8699363464244E-3	-0.43367211614021001	OK_sd
Sputum	Veillonella	levofloxacin_inhal	4.6815397824258998E-4	2.4578083857735998E-3	-0.448433514334378	OK_sd
Sputum	Atopobium	levofloxacin_inhal	3.5785776690430801E-2	6.2625109208253996E-2	-0.27870495063366602	C: sex
Sputum	Megasphaera	levofloxacin_inhal	4.3565619320868303E-4	2.4578083857735998E-3	-0.45061940841431802	OK_sd
Sputum	Scardovia	levofloxacin_inhal	2.16347643285404E-5	9.0866010179869701E-4	0.53077982903449095	OK_sd
Sputum	Neisseria	levofloxacin_inhal	4.3565619320868303E-4	2.4578083857735998E-3	-0.45061940841431802	OK_sd
Sputum	Haemophilus	levofloxacin_inhal	3.0757598023846698E-4	2.4578083857735998E-3	-0.46099527597800199	OK_sd
Sputum	Abiotrophia	levofloxacin_inhal	7.3872058441880996E-3	1.9391415340993801E-2	-0.35122387298591201	C: acetylcystein
Sputum	Corynebacterium	levofloxacin_inhal	2.7034466161634202E-3	8.1103398484902601E-3	-0.39007821901402401	OK_sd
Sputum	Gemella	levofloxacin_inhal	1.88910843918287E-3	6.1032734188985098E-3	0.40288148876889102	C: acetylcystein
Sputum	Bergeyella	levofloxacin_inhal	1.5409994965582599E-3	5.3934982379538997E-3	-0.40993968033876099	AD
Sputum	Leptotrichia	levofloxacin_inhal	7.5097126467490701E-4	2.8699363464244E-3	-0.43370092366381902	AD
Sputum	Dialister	levofloxacin_inhal	2.15144102288354E-2	4.5180261480554401E-2	-0.30397812722856699	C: sex
Sputum	Fusobacterium	levofloxacin_inhal	9.0051211844263996E-5	1.2607169658197001E-3	-0.49517244779904301	C: delta_ETI_merged
Sputum	Parvimonas	levofloxacin_inhal	6.5879602259865403E-5	1.2607169658197001E-3	-0.50332229568471698	OK_sd
Sputum	Prevotella	levofloxacin_inhal	4.2747026871877802E-4	2.4578083857735998E-3	-0.451193315922154	AD
Sputum	TM7x	colistin_inhal	1.6324790365607801E-3	2.2854706511850901E-2	-0.40795660643348702	AD
Sputum	Prevotella_7	colistin_inhal	3.4693074249179398E-3	3.6427727961638297E-2	0.38086238733224698	C: anticholinergic
Sputum	TM7x	tobramycin_inhal	5.5701825100007698E-3	7.7982555140010804E-2	-0.36261537669729699	OK_sd
Sputum	Gemella	tobramycin_inhal	4.7973013056574303E-3	7.7982555140010804E-2	-0.36848373440116799	C: ssri, treatmentdays_365prior_visit, delta_ETI_merged, pseudo_pos_sputum
Sputum	Mogibacterium	isotonic_na_cl	2.4616114007983401E-3	3.44625596111768E-2	0.39347444120092601	AD
Sputum	Prevotella_7	anticholinergic	2.3886960872695301E-6	1.0032523566531999E-4	0.578916141951485	OK_sd
Sputum	Neisseria	dn_ase	3.1649936837033203E-2	9.9703690078799104E-2	-0.28499857003331502	C: levofloxacin_inhal, pp_fev_percent, pp_fvc_percent, delta_ETI_merged
Sputum	Haemophilus	dn_ase	6.0543524158724101E-3	4.2142257993510797E-2	-0.35929395955313298	C: pp_fev_percent
Sputum	Campylobacter	dn_ase	1.7205075707622901E-2	8.02903533022402E-2	-0.31445911889801098	C: sex, delta_ETI_merged
Sputum	Peptostreptococcus	dn_ase	7.7710315699994094E-6	3.2638332593997501E-4	-0.55408070740257098	OK_sd
Sputum	Solobacterium	dn_ase	6.7165279368226003E-3	4.2142257993510797E-2	-0.35510944719677601	AD
Sputum	Stomatobaculum	dn_ase	7.8249251585072108E-3	4.2142257993510797E-2	-0.34885083477162399	AD
Sputum	Leptotrichia	dn_ase	2.7176521323036499E-2	9.9703690078799104E-2	-0.29263130964223999	C: levofloxacin_inhal, treatmentdays_365prior_visit, pp_fev_percent, delta_ETI_merged
Sputum	Fusobacterium	dn_ase	1.49053892527069E-4	3.1301317430684501E-3	-0.48158326185248501	OK_sd
Sputum	Prevotella	dn_ase	3.2303550626413199E-3	3.39187281577338E-2	-0.38352583185225297	AD
Sputum	Eikenella	cortison_oral	3.9039032837343002E-3	8.1981968958420401E-2	0.37640908633270198	OK_sd
Sputum	Streptococcus	antihistaminikum	4.5966174044605396E-3	4.1875181749980603E-2	0.37014315980913398	C: pseudo_pos_sputum
Sputum	Kingella	antihistaminikum	4.4327390109544004E-3	4.1875181749980603E-2	0.37154625328885799	C: ursodesoxychols_a_ure
Sputum	Solobacterium	ursodesoxychols_a_ure	3.9352541908458999E-3	5.5093558671842499E-2	-0.376105057939566	AD
Sputum	Kingella	ursodesoxychols_a_ure	3.7975677073016001E-3	5.5093558671842499E-2	0.37745660103396	OK_sd
Sputum	Prevotella_7	ursodesoxychols_a_ure	7.7543894608214203E-4	3.2568435735449999E-2	-0.43267698148524902	C: anticholinergic, insulin
Sputum	Corynebacterium	nsaid	7.9849046889156499E-6	3.3536599693445698E-4	0.553484802438447	OK_sd
Sputum	Corynebacterium	laxantien	7.0313645787872298E-7	2.9531731230906401E-5	0.68073118139481903	OK_sd
Sputum	F0332	laxantien	3.8867937888401001E-4	8.1622669565642094E-3	0.52226283876844304	C: antihistaminikum, gpt_alat_u_l, got_asat_u_l
Sputum	Porphyromonas	acetylcystein	1.18130327453514E-5	2.4807368765237999E-4	-0.54475892912673796	AD
Sputum	Scardovia	acetylcystein	9.0307335210779898E-5	9.4822701971318903E-4	0.49509743671249601	C: levofloxacin_inhal
Sputum	Neisseria	acetylcystein	5.9353872604313998E-3	2.07738554115099E-2	-0.36008787914935902	C: levofloxacin_inhal, pp_fev_percent
Sputum	Haemophilus	acetylcystein	2.2819573036529199E-2	5.04432667123276E-2	-0.301156707451181	C: levofloxacin_inhal, pp_fev_percent
Sputum	Abiotrophia	acetylcystein	6.1597542098094395E-4	2.8745519645777401E-3	-0.43995947615397202	OK_sd
Sputum	Peptostreptococcus	acetylcystein	1.0903697472552401E-5	2.4807368765237999E-4	-0.54656357203491202	C: dn_ase
Sputum	Gemella	acetylcystein	1.93036164851259E-4	1.6215037847505699E-3	0.474383113252417	OK_sd
Sputum	Eikenella	acetylcystein	3.1559045691717E-3	1.20498174459283E-2	-0.38439137582751298	C: cortison_oral
Sputum	Bergeyella	acetylcystein	3.36590424330269E-4	2.0195425459816202E-3	-0.45833998724550001	AD
Sputum	Leptotrichia	acetylcystein	5.4771522931322203E-2	8.5200146782056702E-2	-0.255817529571502	C: age_y, levofloxacin_inhal, treatmentdays_365prior_visit, pp_fev_percent
Sputum	Dialister	acetylcystein	1.6233121709678399E-2	4.30218096295856E-2	-0.31712925115398599	C: sex
Sputum	Fusobacterium	acetylcystein	5.3486764457240398E-4	2.8080551340051202E-3	-0.44434685458947498	C: dn_ase
Sputum	Prevotella	acetylcystein	2.9840405615507299E-4	2.0195425459816202E-3	-0.46188219493971899	AD
Sputum	Prevotella_7	insulin	4.0882463268817899E-5	1.7170634572903499E-3	0.62962962962962998	OK_sd
Sputum	Actinomyces	ssri	6.3359053767529502E-3	8.8702675274541398E-2	-0.53557312252964395	C: pseudo_pos_sputum
Sputum	Gemella	ssri	3.8323502337611298E-3	8.0479354908983697E-2	-0.56719367588932801	C: pseudo_pos_sputum
Sputum	Haemophilus	treatmentdays_365prior_visit	1.1082011138300099E-3	9.3088893561720596E-3	-0.42105216601693801	C: pp_fev_percent, delta_ETI_merged
Sputum	Mycoplasma	treatmentdays_365prior_visit	1.3420989119247601E-2	6.1479332461745903E-2	-0.32570925034653803	C: chlorid_mmol_cl_l
Sputum	Gemella	treatmentdays_365prior_visit	3.43889333610898E-2	9.0270950072860595E-2	-0.28075960649625697	AD
Sputum	Lautropia	treatmentdays_365prior_visit	2.5121273797464899E-2	7.53638213923946E-2	-0.29649727691702299	AD
Sputum	Leptotrichia	treatmentdays_365prior_visit	3.03804181410003E-5	1.27597756192201E-3	-0.52265651020739801	OK_sd
Sputum	Staphylococcus	chlorid_mmol_cl_l	4.4334834113435599E-4	9.3103151638214698E-3	0.57668493934540999	OK_sd
Sputum	Mycoplasma	chlorid_mmol_cl_l	2.7670309092911E-4	9.3103151638214698E-3	-0.59292711856594205	AD
Sputum	Alloprevotella	interleukin8_pg_ml	1.3629477050796699E-2	8.1776862304780096E-2	-0.35379051939466599	OK_sd
Sputum	Bergeyella	interleukin8_pg_ml	2.13810457897273E-3	4.49001961584274E-2	-0.43253976916779702	OK_sd
Sputum	Dialister	interleukin8_pg_ml	4.3884436115308699E-3	4.6836945314991101E-2	-0.404141881014076	AD
Sputum	Actinomyces	ig_g_g_l	1.1971582517277099E-2	7.1829495103662697E-2	-0.342828343986606	C: pseudo_pos_sputum
Sputum	F0332	ig_g_g_l	8.5789838385590502E-4	1.8015866060973999E-2	-0.44437127253734998	C: gpt_alat_u_l, got_asat_u_l, pseudo_pos_sputum
Sputum	[Eubacterium] nodatum group	ig_g_g_l	1.3938156841069799E-3	1.9513419577497599E-2	-0.42787744122372601	C: pp_fvc_percent
Sputum	Pseudomonas	ig_g_g_l	4.48776328822223E-5	1.8848605810533399E-3	0.52993433098352505	C: leukozyten_nl
Sputum	Fusobacterium	ig_g_g_l	4.2591515373165204E-3	3.5776872913458699E-2	-0.38645383277734402	C: dn_ase, delta_ETI_merged
Sputum	Pseudomonas	leukozyten_nl	1.41156494739903E-6	5.9285727790759203E-5	0.60279762679958504	AD
Sputum	Gemella	gpt_alat_u_l	3.6690710150087801E-3	7.7050491315184502E-2	0.38534860072334698	C: acetylcystein, ssri, treatmentdays_365prior_visit, delta_ETI_merged, pseudo_pos_sputum
Sputum	F0332	gpt_alat_u_l	1.5154225509875899E-4	6.3647747141478599E-3	0.48902872793080499	AD
Sputum	F0332	got_asat_u_l	5.0043698156611305E-4	2.1018353225776699E-2	0.45388890652998298	AD
Sputum	Lachnoanaerobaculum	pp_fev_percent	1.3101724960982501E-4	3.72505912284121E-3	0.49306174958411098	OK_sd
Sputum	Scardovia	pp_fev_percent	8.2180715037938302E-4	8.6289750789835199E-3	-0.43811272286707498	AD
Sputum	Neisseria	pp_fev_percent	6.7339792096159003E-3	2.57115569821698E-2	0.361247881815637	AD
Sputum	Mogibacterium	pp_fev_percent	1.7738376775434299E-4	3.72505912284121E-3	0.48460829908108799	AD
Sputum	Haemophilus	pp_fev_percent	1.8213985113555099E-3	1.0928391068133E-2	0.411103651610636	OK_sd
Sputum	Solobacterium	pp_fev_percent	1.6061122858773999E-3	1.0928391068133E-2	0.41552290833482403	AD
Sputum	Lautropia	pp_fev_percent	2.2159503326461698E-2	5.4747008218317197E-2	0.307996861628347	AD
Sputum	Stomatobaculum	pp_fev_percent	2.1461913877886501E-3	1.1267504785890401E-2	0.40524795733734997	AD
Sputum	Bergeyella	pp_fev_percent	4.5441290370919103E-3	1.9085341955786001E-2	0.37706087550178902	C: levofloxacin_inhal, acetylcystein
Sputum	Leptotrichia	pp_fev_percent	3.9300847944844603E-3	1.83403957075941E-2	0.38270871615916102	OK_sd
Sputum	[Eubacterium] nodatum group	pp_fev_percent	1.01475247739869E-2	3.2784310808265403E-2	0.34389700125580103	C: pp_fvc_percent, pseudo_pos_sputum
Sputum	Pseudomonas	pp_fev_percent	1.2990992173930399E-2	3.77990098278514E-2	-0.33297428236732601	AD
Sputum	Prevotella	pp_fev_percent	1.34996463670898E-2	3.77990098278514E-2	0.33124201974136902	AD
Sputum	Rothia	pp_fev_percent	2.0910167549604099E-2	5.4747008218317197E-2	0.31080886147725301	OK_sd
Sputum	Neisseria	pp_fvc_percent	1.4994535244959899E-2	6.99744978098127E-2	0.326456600645046	AD
Sputum	Mogibacterium	pp_fvc_percent	1.3752242200898399E-4	2.88797086218866E-3	0.49172446673521097	AD
Sputum	Solobacterium	pp_fvc_percent	1.7391980430252101E-5	7.3046317807058995E-4	0.54434483005392298	AD
Sputum	Stomatobaculum	pp_fvc_percent	5.19823709949182E-4	5.4581489544664099E-3	0.45270650184856798	AD
Sputum	[Eubacterium] nodatum group	pp_fvc_percent	3.3581967126116802E-4	4.7014753976563498E-3	0.46604798185185298	OK_sd
Sputum	Staphylococcus	delta_ETI_merged	7.08499695190572E-6	2.9756987198004001E-4	-0.55610072456337301	C: chlorid_mmol_cl_l
Sputum	Megasphaera	delta_ETI_merged	1.15335629006029E-2	4.9906024403895598E-2	0.33238196433248901	OK_sd
Sputum	Neisseria	delta_ETI_merged	4.4082852423881999E-4	6.1715993393434802E-3	0.45026180593836801	OK_sd
Sputum	Haemophilus	delta_ETI_merged	4.54378026643473E-3	2.7262681598608399E-2	0.370590660243453	OK_sd
Sputum	Oribacterium	delta_ETI_merged	1.1882386762832301E-2	4.9906024403895598E-2	0.33108117609863602	OK_sd
Sputum	Campylobacter	delta_ETI_merged	7.8816154601119503E-4	8.2756962331175504E-3	0.43215602733021602	OK_sd
Sputum	Mycoplasma	delta_ETI_merged	3.3849209262142902E-3	2.3694446483500001E-2	0.38178389827016301	AD
Sputum	Gemella	delta_ETI_merged	1.1229453485591E-2	4.9906024403895598E-2	0.33354400674678403	AD
Sputum	F0332	delta_ETI_merged	3.0179396966667198E-2	9.7502667123078798E-2	0.28740213951423799	C: laxantien, gpt_alat_u_l
Sputum	Granulicatella	delta_ETI_merged	2.1045967813963001E-4	4.4196532409322298E-3	0.47194077922160599	OK_nc
Sputum	Leptotrichia	delta_ETI_merged	1.37916773015286E-3	1.1585008933283999E-2	0.41372156344511801	OK_sd
Sputum	Dialister	delta_ETI_merged	1.8798165950405201E-2	7.1774815447001594E-2	0.31034868595005799	AD
Sputum	Fusobacterium	delta_ETI_merged	2.1482628981259501E-2	7.5189201434408395E-2	0.30404861691007001	OK_sd
Sputum	Staphylococcus	staph_pos_sputum	2.04716238951998E-3	8.5980820359839394E-2	Inf	OK_sd
Sputum	Streptococcus	pseudo_pos_sputum	2.1314081998112999E-3	1.49198573986791E-2	Inf	AD
Sputum	Actinomyces	pseudo_pos_sputum	8.8849419114567503E-5	1.2438918676039501E-3	Inf	OK_sd
Sputum	Gemella	pseudo_pos_sputum	4.57063963418936E-4	4.7991716158988298E-3	Inf	OK_sd
Sputum	F0332	pseudo_pos_sputum	1.14717138604923E-5	4.3141571856055501E-4	Inf	OK_sd
Sputum	[Eubacterium] nodatum group	pseudo_pos_sputum	4.6895010946198601E-3	2.8137006567719201E-2	Inf	C: pp_fvc_percent
Sputum	Pseudomonas	pseudo_pos_sputum	2.0543605645740702E-5	4.3141571856055501E-4	Inf	AD
Throat	Alloprevotella	sex	6.6717090447221796E-7	2.4685323465472101E-5	-0.391446208112875	OK_sd
Throat	Rothia	sex	8.6009787515657404E-4	5.30393689679887E-3	0.26437389770723102	C: dn_ase, antidiabetic_oral
Throat	Porphyromonas	mutation_status	1.8853668010458602E-5	3.01318634132135E-4	Inf	AD
Throat	Capnocytophaga	mutation_status	2.4899771445903701E-6	9.2129154349843506E-5	Inf	OK_sd
Throat	Porphyromonas	age_y	2.52052045796987E-3	4.6629628472442701E-3	-0.205974393098108	C: hb_a1c_percent, total_reads
Throat	Prevotella_7	age_y	7.1832003404601497E-5	2.2148201049752099E-4	0.26859404457500902	OK_sd
Throat	Alloprevotella	age_y	1.10030089667609E-5	4.5234592418906101E-5	-0.29619620380449302	OK_sd
Throat	Lachnoanaerobaculum	age_y	2.4428667162782399E-9	3.0128689500765E-8	-0.39436531703459599	OK_sd
Throat	Neisseria	age_y	2.34692209578015E-7	2.17090293859664E-6	-0.345287302740307	C: pp_fev_percent
Throat	Abiotrophia	age_y	1.4168449109849E-5	5.2423261706441202E-5	-0.29264069163235701	AD
Throat	Lautropia	age_y	1.52254700398574E-10	2.8167119573736101E-9	-0.42068008887462	C: ig_g_g_l
Throat	Actinobacillus	age_y	5.9776651874653103E-6	2.7646701492026999E-5	-0.30458704204083298	C: ig_g_g_l
Throat	Bergeyella	age_y	3.9498313365482497E-6	2.0877679921755101E-5	-0.31014098894839598	OK_sd
Throat	Leptotrichia	age_y	1.02044481344003E-13	3.7756458097281101E-12	-0.48075140009256701	OK_sd
Throat	Fusobacterium	age_y	1.32768687069015E-6	9.8248828431071008E-6	-0.32424036950881102	C: pp_fev_percent, staph_pos_sputum
Throat	Haemophilus	age_y	1.9886856253935898E-3	3.8727035862927699E-3	-0.21071089344348601	C: insulin, hb_a1c_percent, pp_fev_percent
Throat	Atopobium	BMI	1.4754944045158301E-3	1.09186585934172E-2	0.21704054600690301	AD
Throat	Gemella	BMI	4.4104815767278399E-3	2.7197969723155E-2	-0.19482152044282	C: mannitol
Throat	Lautropia	BMI	4.4861859725151899E-5	1.6598888098306201E-3	-0.27643070811185999	C: age_y, chlorid_mmol_cl_l, ig_g_g_l
Throat	Stomatobaculum	BMI	7.3673049545307896E-4	9.0863427772546503E-3	0.230074803788334	AD
Throat	Granulicatella	BMI	6.1309519330724198E-4	9.0863427772546503E-3	-0.23340358456567001	OK_sd
Throat	Peptococcus	levofloxacin_inhal	1.5160909569932499E-3	2.6712078766071598E-3	-0.21651580795733399	C: pp_fev_percent
Throat	Peptostreptococcus	levofloxacin_inhal	3.8535133387378199E-7	2.0368570504756998E-6	-0.34018265219373001	C: pp_fev_percent
Throat	Prevotella	levofloxacin_inhal	3.9523698498492297E-11	1.4623768444442101E-9	-0.43361622863969701	OK_sd
Throat	Candidatus Saccharimonas	levofloxacin_inhal	2.080850847321E-4	5.1327654233917998E-4	-0.25209851811471701	C: pp_fev_percent
Throat	[Eubacterium] nodatum group	levofloxacin_inhal	4.2597249528262501E-6	1.31341519378809E-5	-0.30983732873339698	OK_sd
Throat	Fusobacterium	levofloxacin_inhal	9.8256001184422002E-11	1.81773602191181E-9	-0.42554641768817197	OK_sd
Throat	Parvimonas	levofloxacin_inhal	8.6078976503507703E-7	3.18492213062979E-6	-0.33039343650494502	OK_sd
Throat	Granulicatella	colistin_inhal	7.9717351479921903E-3	2.50237953088112E-2	-0.181780937867248	OK_sd
Throat	Megasphaera	dpi_colistin	2.92760658941381E-5	1.08321443808311E-3	-0.28280753681091902	C: chlorid_mmol_cl_l
Throat	TM7x	dpi_colistin	1.53733652571781E-2	4.1298160408010903E-2	0.16626686806386701	C: hb_a1c_percent
Throat	Actinomyces	tobramycin_inhal	3.2162583727223899E-3	4.0658609652884599E-2	-0.20146323820727499	C: pseudo_pos_sputum
Throat	TM7x	tobramycin_inhal	3.2966440259095601E-3	4.0658609652884599E-2	-0.20095129230358899	AD
Throat	Granulicatella	tobramycin_inhal	1.0016747494793199E-3	3.7061965730734697E-2	-0.22439999818933701	OK_sd
Throat	Prevotella_7	azetronam_inhal	4.89300518899105E-3	9.0520595996334496E-2	0.19259196136469001	OK_sd
Throat	Megasphaera	anticholinergic	1.57813588771863E-4	1.1678205569117799E-3	-0.25666122909059502	AD
Throat	Capnocytophaga	anticholinergic	4.2415161976048402E-2	7.4731475862561403E-2	0.13952379832504799	OK_sd
Throat	Campylobacter	anticholinergic	4.09415177943137E-3	1.5148361583896101E-2	-0.19640552526998301	AD
Throat	Lautropia	anticholinergic	5.2465299602065901E-5	6.4707202842548002E-4	-0.27405175612848998	C: age_y
Throat	Leptotrichia	anticholinergic	1.82363366037756E-7	6.7474445433969801E-6	-0.34900303783561898	OK_sd
Throat	[Eubacterium] brachy group	anticholinergic	1.3099671503030601E-5	2.42343922806065E-4	-0.29441761550954898	C: pp_fev_percent, staph_pos_throat
Throat	Prevotella_7	laba_inhal	2.31031763688507E-3	7.77106841497707E-3	0.20821086581693701	AD
Throat	Alloprevotella	dn_ase	3.14398369268507E-5	5.8163698314673705E-4	-0.28175298974114199	OK_sd
Throat	TM7x	dn_ase	3.04041151196251E-3	1.12495225942613E-2	-0.20262477433708001	C: hb_a1c_percent
Throat	Stomatobaculum	dn_ase	1.09226067149528E-3	8.0827289690650998E-3	-0.22277533472699601	AD
Throat	Actinobacillus	dn_ase	1.68706808874723E-3	9.0757887594063204E-3	-0.21443803723425001	C: ig_g_g_l
Throat	Leptotrichia	dn_ase	1.6211937333608101E-5	5.8163698314673705E-4	-0.29138935846358799	OK_sd
Throat	Rothia	dn_ase	1.4513707583459001E-2	3.5800478705865599E-2	0.16767570394753201	C: chlorid_mmol_cl_l
Throat	Haemophilus	dn_ase	8.6713404694246005E-5	1.0694653245623699E-3	-0.26626480529483199	C: pp_fev_percent
Throat	Lachnoanaerobaculum	mannitol	1.54432241101093E-2	8.1628470296292097E-2	0.16615543137974501	AD
Throat	Gemella	mannitol	9.2838196511162305E-7	3.4350132709130097E-5	-0.32945503289228301	OK_sd
Throat	Capnocytophaga	cortison_inhal	1.0660754593006499E-3	3.94447919941242E-2	-0.223231848602296	AD
Throat	Lautropia	cortison_inhal	4.4432257167511596E-3	4.50254679822941E-2	-0.194663448636685	C: ig_g_g_l
Throat	Butyrivibrio	cortison_inhal	3.8992341757899001E-3	4.50254679822941E-2	-0.19743739713785499	C: leukozyten_nl
Throat	Lachnoanaerobaculum	cortison_nasal	8.6546049939199095E-4	4.7026123843912403E-3	0.22711729429449801	C: age_y, mannitol, crp_mg_l, pp_fev_percent
Throat	Megasphaera	cortison_nasal	4.8290331726063099E-6	1.7867422738643401E-4	0.30815827924566402	C: dpi_colistin
Throat	Mogibacterium	cortison_nasal	2.76213279436407E-5	5.1099456695735299E-4	0.28366486739663399	OK_sd
Throat	Abiotrophia	ursodesoxychols_a_ure	1.8110553630787E-4	6.7009048433912003E-3	-0.25440028687750299	C: age_y, staph_pos_throat
Throat	Prevotella_7	ppi	2.5586038684984099E-3	3.1556114378147003E-2	-0.20615094390700001	AD
Throat	Actinomyces	ppi	8.84215516024705E-4	1.6357987046456999E-2	-0.22672071886119	C: ssri, pseudo_pos_sputum
Throat	Haemophilus	orale_zusatznahrung	1.16336137936735E-4	4.3044371036591996E-3	0.26220200847153802	C: hb_a1c_percent
Throat	Neisseria	laxantien	1.1532086523123001E-3	1.42229067118517E-2	0.25162690814234201	C: hb_a1c_percent, ig_g_g_l
Throat	Mogibacterium	laxantien	1.38082340439736E-2	7.2986379946717403E-2	-0.19194351610327301	AD
Throat	Bergeyella	laxantien	3.5430801172880301E-5	1.3109396433965701E-3	0.31697929650613499	C: hb_a1c_percent, pp_fev_percent
Throat	Veillonella	acetylcystein	8.1891694912710801E-4	7.5749817794257502E-3	-0.228136728409636	C: ig_g_g_l
Throat	TM7x	acetylcystein	2.3175811239203599E-2	4.76391675472519E-2	-0.15590719725805199	OK_sd
Throat	Gemella	acetylcystein	1.0992005259323699E-4	1.35568064864992E-3	0.26250520858982301	OK_sd
Throat	Leptotrichia	acetylcystein	1.5364865378148599E-2	4.0607144213678503E-2	-0.166280456990544	C: age_y, dn_ase, treatmentdays_365prior_visit, chlorid_mmol_cl_l, pp_fev_percent
Throat	Butyrivibrio	acetylcystein	1.1360891143436001E-2	3.2334844023625603E-2	-0.17356174325599799	C: leukozyten_nl
Throat	Actinomyces	insulin	2.5911367159783399E-2	4.5653361186285102E-2	-0.222268907563025	C: tobramycin_inhal, ppi, ssri, pseudo_pos_sputum
Throat	Lachnoanaerobaculum	insulin	1.24006085049271E-4	4.5882251468230199E-4	-0.38193277310924401	C: age_y, mannitol, pp_fev_percent
Throat	Megasphaera	insulin	3.8924992732173601E-5	1.80028091386303E-4	-0.40826330532212901	AD
Throat	Oribacterium	insulin	2.49333707445077E-8	3.0751157251559601E-7	-0.55490196078431397	OK_sd
Throat	TM7x	insulin	1.85492665075969E-8	3.0751157251559601E-7	-0.54691876750700297	OK_sd
Throat	Lautropia	insulin	4.4444775376313899E-5	1.8271740988040199E-4	-0.36750700280111998	C: age_y, ig_g_g_l, pp_fev_percent
Throat	Actinobacillus	insulin	1.11636037069598E-3	3.1773333627501E-3	-0.27787114845938399	C: age_y, ig_g_g_l, got_asat_u_l
Throat	Selenomonas	insulin	9.5702402958488096E-6	7.0819778189281203E-5	-0.43725490196078398	AD
Throat	Leptotrichia	insulin	7.7591910552659997E-7	7.1772517261210498E-6	-0.49019607843137297	OK_sd
Throat	Haemophilus	insulin	2.43094015779128E-8	3.0751157251559601E-7	-0.55560224089635901	AD
Throat	Campylobacter	antidiabetic_oral	1.6458522119886901E-4	2.5891908993231302E-3	0.60317460317460303	OK_sd
Throat	Bergeyella	antidiabetic_oral	2.0993439724241599E-4	2.5891908993231302E-3	-0.560606060606061	C: age_y, hb_a1c_percent, pp_fev_percent
Throat	Rothia	antidiabetic_oral	7.05867179319795E-7	2.61170856348324E-5	-0.79401154401154395	OK_sd
Throat	Actinomyces	ssri	3.1795862369034901E-4	2.9411172691357298E-3	-0.42942942942942902	C: pseudo_pos_sputum
Throat	Neisseria	ssri	5.9313225671298096E-4	3.4861841879887802E-3	-0.40700700700700698	C: laxantien, hb_a1c_percent, pp_fev_percent
Throat	Oribacterium	ssri	1.7594020041272801E-5	6.5097874152709404E-4	-0.51111111111111096	C: insulin
Throat	TM7x	ssri	5.6322865281450399E-4	3.4861841879887802E-3	-0.401001001001001	C: dpi_colistin, tobramycin_inhal, insulin, hb_a1c_percent
Throat	Haemophilus	ssri	1.8912476960835099E-4	2.3325388251696599E-3	-0.44464464464464498	C: insulin, hb_a1c_percent
Throat	Peptococcus	treatmentdays_365prior_visit	1.0307061223727299E-3	4.7670158159738799E-3	-0.22438758732137001	C: pp_fev_percent
Throat	Actinobacillus	treatmentdays_365prior_visit	6.5270558161236404E-5	8.0500355065524904E-4	-0.27132018225101801	C: ig_g_g_l
Throat	Leptotrichia	treatmentdays_365prior_visit	4.9503718938882497E-5	8.0500355065524904E-4	-0.275570071473072	OK_sd
Throat	Megasphaera	chlorid_mmol_cl_l	7.0829875817419001E-3	5.7478545254578198E-2	-0.26772313406664799	OK_sd
Throat	Lautropia	chlorid_mmol_cl_l	5.8257878621812299E-3	5.7478545254578198E-2	-0.273892638742676	OK_sd
Throat	Leptotrichia	chlorid_mmol_cl_l	1.45754933492449E-4	5.3929325392206E-3	-0.370845162754117	C: dn_ase, treatmentdays_365prior_visit
Throat	Rothia	chlorid_mmol_cl_l	4.2560338669804998E-4	7.87366265391393E-3	0.34578026588428601	AD
Throat	Porphyromonas	hb_a1c_percent	1.3037348490712801E-3	2.17442982110439E-2	-0.30278273489072499	AD
Throat	Neisseria	hb_a1c_percent	1.76305120630085E-3	2.17442982110439E-2	-0.294902405139924	C: pp_fev_percent
Throat	TM7x	hb_a1c_percent	4.79120735269446E-3	3.5454934409939E-2	-0.26709454935847199	C: acetylcystein, insulin
Throat	Bergeyella	hb_a1c_percent	4.2073819331687797E-3	3.5454934409939E-2	-0.27087123962938298	C: age_y, pp_fev_percent
Throat	Fusobacterium	hb_a1c_percent	1.1777159144242299E-2	7.2625814722827503E-2	-0.23938564604827101	C: levofloxacin_inhal, pp_fev_percent, pp_fvc_percent
Throat	Haemophilus	hb_a1c_percent	1.83756502230525E-4	6.79899058252944E-3	-0.34931720796703702	C: pp_fev_percent
Throat	Lachnoanaerobaculum	crp_mg_l	1.2220473833208401E-3	1.13039382957177E-2	-0.25038875187396897	C: age_y, pp_fev_percent, total_reads
Throat	Peptostreptococcus	crp_mg_l	1.02607396944897E-2	2.5309824579741302E-2	-0.19994360837639499	C: pseudo_pos_sputum
Throat	Prevotella_7	ig_g_g_l	1.0093459222560399E-5	1.24485997078245E-4	0.30013266510506997	C: age_y
Throat	Veillonella	ig_g_g_l	2.05600773328231E-4	1.2678714355240899E-3	0.25406443351642499	AD
Throat	Neisseria	ig_g_g_l	7.3606778600896004E-4	3.0260564535923898E-3	-0.23171115628633701	C: pp_fev_percent
Throat	Capnocytophaga	ig_g_g_l	3.3671459514241203E-5	3.1146100050673101E-4	-0.28268347405761401	C: cortison_inhal, total_reads
Throat	Lautropia	ig_g_g_l	1.41268890073987E-6	2.6134744663687702E-5	-0.32640285462448099	OK_sd
Throat	Actinobacillus	ig_g_g_l	3.0118062159750099E-7	1.11436829991075E-5	-0.345447579418655	OK_sd
Throat	Candidatus Saccharimonas	ig_g_g_l	9.4745851870475E-5	7.0111930384151504E-4	-0.26671422937783901	AD
Throat	Haemophilus	ig_g_g_l	1.67903592100999E-3	5.6476662797608802E-3	-0.21604724262115799	C: insulin, ssri, pp_fev_percent
Throat	Butyrivibrio	leukozyten_nl	1.50008828974582E-2	9.2505444534325701E-2	-0.16805919405556599	AD
Throat	Fusobacterium	leukozyten_nl	1.13933965827088E-2	8.4311134712045196E-2	-0.17473046038753801	C: pp_fev_percent, pp_fvc_percent, staph_pos_throat, staph_pos_sputum
Throat	Campylobacter	gpt_alat_u_l	2.1942969152298301E-5	8.1188985863503904E-4	-0.28768716462878002	AD
Throat	Actinobacillus	gpt_alat_u_l	5.0430048679718804E-3	6.3855723285732705E-2	0.19239022332030301	C: insulin, treatmentdays_365prior_visit, ig_g_g_l, got_asat_u_l
Throat	Campylobacter	got_asat_u_l	1.5314236186369899E-4	2.8331336944784199E-3	-0.25774698829514398	AD
Throat	Stomatobaculum	got_asat_u_l	6.6501277657474199E-3	5.2292210296898199E-2	-0.186299064869238	AD
Throat	Actinobacillus	got_asat_u_l	9.2323036303670997E-5	2.8331336944784199E-3	0.265888826123788	OK_sd
Throat	Porphyromonas	pp_fev_percent	8.1225220438914704E-3	1.2021332624959399E-2	0.18264494152764399	AD
Throat	Prevotella_7	pp_fev_percent	3.7919449730178099E-4	7.7945535556477096E-4	-0.243593337478307	C: age_y
Throat	Lachnoanaerobaculum	pp_fev_percent	1.6881229741633301E-7	1.5615137511010801E-6	0.35226699788983301	C: age_y
Throat	Peptococcus	pp_fev_percent	1.92681822932696E-8	2.37640914950325E-7	0.37649877271813298	AD
Throat	Neisseria	pp_fev_percent	9.8156253823100396E-5	2.5941295653248E-4	0.26615044374357999	OK_sd
Throat	Mogibacterium	pp_fev_percent	4.4896001981971701E-6	1.8457245259254999E-5	0.31126075468151598	AD
Throat	Peptostreptococcus	pp_fev_percent	7.8502212580606705E-7	5.8091637309648998E-6	0.33379402387681301	OK_sd
Throat	Prevotella	pp_fev_percent	3.8546616052255697E-5	1.18852066161122E-4	0.28065126277713098	C: levofloxacin_inhal
Throat	Lautropia	pp_fev_percent	1.41927483803757E-6	6.9233557435887901E-6	0.326343562836441	C: age_y, ig_g_g_l
Throat	Candidatus Saccharimonas	pp_fev_percent	2.44291727256378E-4	5.6492461928037304E-4	0.25115970371499002	AD
Throat	Bergeyella	pp_fev_percent	2.6437000917500097E-4	5.7539354938088399E-4	0.249817575239171	C: age_y
Throat	Leptotrichia	pp_fev_percent	5.7653592376508001E-11	2.13318291793079E-9	0.43309942457790601	C: age_y
Throat	[Eubacterium] nodatum group	pp_fev_percent	9.5721400266479006E-5	2.5941295653248E-4	0.26655104049260903	C: levofloxacin_inhal
Throat	[Eubacterium] brachy group	pp_fev_percent	1.26810036834455E-6	6.9233557435887901E-6	0.32777578684161701	AD
Throat	Fusobacterium	pp_fev_percent	2.7871978421289701E-9	5.1563160079385901E-8	0.39653107277867999	OK_sd
Throat	Haemophilus	pp_fev_percent	1.1966759456053699E-5	4.4277009987398803E-5	0.297734967915885	OK_sd
Throat	Streptococcus	pp_fev_percent	1.3422519699205599E-4	3.3108881924707198E-4	-0.261105519055986	C: total_reads
Throat	[Eubacterium] brachy group	pp_fvc_percent	1.48972124052282E-5	5.5119685899344397E-4	0.295302069330519	AD
Throat	Fusobacterium	pp_fvc_percent	1.20237523953122E-3	1.48292946208851E-2	0.22304553822725101	C: age_y, pp_fev_percent, staph_pos_sputum
Throat	Catonella	cftr_prior_v1	3.8056093517466302E-4	7.0403773007312702E-3	0.28904665314401601	AD
Throat	Gemella	cftr_prior_v1	2.2280069444575101E-4	7.0403773007312702E-3	0.31409736308316399	C: acetylcystein
Throat	Porphyromonas	total_reads	2.5098492556199599E-3	1.8572884491587699E-2	0.20606008639984799	C: hb_a1c_percent
Throat	Lachnoanaerobaculum	total_reads	2.06020894701803E-4	3.81138655198336E-3	0.25168402228714898	AD
Throat	Neisseria	total_reads	3.6730320327007502E-3	2.2650364201654598E-2	0.19823180038400301	C: hb_a1c_percent
Throat	Mogibacterium	total_reads	1.8148636377645098E-2	5.1653811228682199E-2	0.16176499706915801	C: laxantien
Throat	Capnocytophaga	total_reads	1.4136743957386001E-2	5.0470672884164597E-2	0.1679220769891	OK_sd
Throat	Solobacterium	total_reads	9.7590996320111203E-4	1.2036222879480399E-2	0.22436568507201199	OK_sd
Throat	Prevotella	total_reads	5.7493971249513902E-3	3.0389670517600199E-2	0.188639525371332	AD
Throat	Bergeyella	total_reads	8.2871464800559503E-3	3.6519798468466397E-2	0.18047365418816599	C: laxantien, hb_a1c_percent
Throat	Leptotrichia	total_reads	1.4792448656897E-3	1.36830150076297E-2	0.21648779891796999	C: chlorid_mmol_cl_l
Throat	Haemophilus	total_reads	1.5336845820426199E-2	5.0470672884164597E-2	0.16593526602570299	C: hb_a1c_percent, ig_g_g_l, pp_fev_percent
Throat	Streptococcus	total_reads	1.03223049436224E-5	3.8192528291403001E-4	-0.29708679511456099	OK_sd
Throat	[Eubacterium] brachy group	basic_nutrition	1.5596425265144901E-6	5.7706773481036103E-5	Inf	C: mutation_status, pp_fev_percent, pp_fvc_percent
Throat	Abiotrophia	staph_pos_throat	1.57622471397886E-5	5.8320314417217899E-4	Inf	OK_sd
Throat	Candidatus Saccharimonas	staph_pos_throat	2.0106535928219701E-2	6.19951524453441E-2	Inf	C: pp_fev_percent
Throat	[Eubacterium] brachy group	staph_pos_throat	9.1692099344014102E-4	7.4647040157260402E-3	Inf	C: basic_nutrition
Throat	Parvimonas	staph_pos_throat	1.27778781932187E-3	7.5688009656469102E-3	Inf	OK_sd
Throat	Fusobacterium	staph_pos_sputum	1.74564496746252E-3	6.4588863796113297E-2	Inf	AD
Throat	Actinomyces	pseudo_pos_sputum	2.14937079750134E-3	7.9526719507549401E-2	Inf	AD
Throat	Peptostreptococcus	pseudo_pos_sputum	4.66236446099773E-3	8.6253742528457994E-2	Inf	OK_sd
Throat	Rothia	pseudo_pos_throat	4.3867087385722097E-5	1.6230822332717199E-3	Inf	AD
Stool	Monoglobus	sex	7.2690034522612497E-3	3.3316265822863997E-2	-0.21442715700141399	OK_sd
Stool	[Eubacterium] eligens group	sex	7.6546486228040397E-5	2.1050283712711099E-3	-0.24846770391324799	OK_sd
Stool	Lachnospiraceae FCS020 group	sex	3.1594361538405599E-3	2.17211235576538E-2	0.201037246581801	C: treatmentdays_365prior_visit
Stool	Roseburia	sex	1.5377332640135601E-4	2.8191776506915301E-3	-0.30278170674210297	C: basic_nutrition
Stool	Parasutterella	sex	3.27890232604584E-5	1.80339627932521E-3	0.297312588401697	C: insulin
Stool	Gemella	mutation_status	4.9706075525245597E-4	9.1127805129616896E-3	Inf	C: cftr_prior_v1, basic_nutrition
Stool	Subdoligranulum	mutation_status	7.3251994414926293E-8	4.0288596928209498E-6	Inf	AD
Stool	Anaerostipes	age_y	1.04726933163325E-6	5.7599813239828698E-5	-0.33247839983114003	OK_sd
Stool	Collinsella	age_y	1.17396909519052E-4	1.2913660047095699E-3	-0.26514137053652898	C: tobramycin_inhal
Stool	Bifidobacterium	age_y	4.2093642265393503E-6	7.7171677486554701E-5	-0.314302394336957	C: colistin_inhal
Stool	Bacteroides	age_y	2.1462023070067901E-6	5.90205634426867E-5	0.32325110524343798	C: basic_nutrition
Stool	Escherichia_Shigella	BMI	1.14786555618227E-3	1.2626521118004899E-2	-0.22608679376312901	C: calprotectin_amg_g_stuhl
Stool	Gemella	BMI	5.5346927932610403E-4	7.6102025907339296E-3	-0.239727376545154	C: basic_nutrition
Stool	Lactococcus	levofloxacin_inhal	1.6189826301784501E-2	4.9468913699897199E-2	-0.16777878108232799	AD
Stool	Collinsella	colistin_inhal	2.7893616037554299E-7	1.5341488820654901E-5	-0.34954873032126599	AD
Stool	Bifidobacterium	colistin_inhal	3.20797422785713E-5	5.8812860844047296E-4	-0.28607610582237403	OK_sd
Stool	[Ruminococcus] torques group	dpi_colistin	1.06945701092521E-3	8.4028765144123392E-3	0.226897415264985	AD
Stool	Faecalibacterium	dpi_colistin	9.1052621428898596E-5	2.5039470892947099E-3	-0.26987648340464399	C: mannitol
Stool	Bacteroides	dpi_colistin	6.3300831434788098E-3	2.6781120991641101E-2	0.190104048645168	C: age_y, basic_nutrition
Stool	Eggerthella	tobramycin_inhal	4.2679303720879097E-5	2.3473617046483502E-3	0.28174184006914299	OK_sd
Stool	CAG-56	tobramycin_inhal	1.3462117826691399E-3	2.4680549348934201E-2	0.22246046172574399	AD
Stool	Veillonella	tobramycin_inhal	1.28099398605366E-2	5.87122243607925E-2	-0.17357970294147801	AD
Stool	Clostridium sensu stricto 1	tobramycin_inhal	1.03001995085619E-2	5.15009975428097E-2	-0.17883486839794999	AD
Stool	Collinsella	tobramycin_inhal	5.4979698685769501E-3	5.0398057128622102E-2	-0.19325626270228799	OK_sd
Stool	Dialister	tobramycin_inhal	2.3176328260370799E-3	2.54939610864078E-2	0.211633902789675	C: saba_inhal, laxantien, staph_pos_throat, pseudo_pos_throat
Stool	Coprococcus	tobramycin_inhal	2.1852686951396002E-3	2.54939610864078E-2	0.21283114344228901	C: azetronam_inhal
Stool	Haemophilus	tobramycin_inhal	1.58316372190167E-2	6.6980003618916997E-2	-0.16834041462794899	AD
Stool	[Eubacterium] eligens group	azetronam_inhal	3.76064237344088E-3	6.8945110179749497E-2	0.201526936350749	C: ssri
Stool	Fusicatenibacter	azetronam_inhal	5.2988679044889703E-3	7.2859433686723304E-2	0.194073612675951	OK_sd
Stool	Dorea	azetronam_inhal	7.6773248453643299E-3	8.4450573299007597E-2	-0.18571041241158001	OK_sd
Stool	Coprococcus	azetronam_inhal	2.7690801115264601E-5	1.5229940613395499E-3	0.28828224391545199	OK_sd
Stool	Megasphaera	laba_inhal	5.2060651144555199E-5	1.43166790647527E-3	-0.278682457222036	AD
Stool	Collinsella	laba_inhal	1.21549463303646E-3	2.22840682723351E-2	0.22444016982260001	C: tobramycin_inhal
Stool	Dialister	saba_inhal	1.61167367599209E-4	8.8642052179565001E-3	-0.26307827827215702	AD
Stool	Monoglobus	dn_ase	4.9885729271532901E-3	5.4874302198686102E-2	-0.195404058766703	C: delta_ETI_merged
Stool	Anaerostipes	dn_ase	1.85110136514154E-3	2.5452643770696198E-2	-0.216175950162379	OK_sd
Stool	Erysipelotrichaceae UCG-003	dn_ase	8.2205241946287598E-4	1.5070961023486099E-2	-0.231868599686852	OK_sd
Stool	Enterococcus	dn_ase	1.4238112847127801E-4	3.91548103296014E-3	0.262610063880793	OK_sd
Stool	Faecalibacterium	mannitol	4.7546288405137602E-7	2.6150458622825699E-5	-0.343089977492614	OK_sd
Stool	Lachnospiraceae UCG-004	mannitol	2.52314949534941E-5	6.9386611122108899E-4	-0.28966748036442003	OK_sd
Stool	Odoribacter	cortison_inhal	8.7212368031802604E-3	9.0444320728125499E-2	0.18275590198054401	AD
Stool	Colidextribacter	cortison_inhal	1.0649990882976201E-2	9.0444320728125499E-2	-0.178038814820555	AD
Stool	Clostridium sensu stricto 1	cortison_nasal	3.9288315736432497E-5	7.2028578850126198E-4	0.28300606936779699	AD
Stool	Haemophilus	cortison_nasal	3.0844311646555003E-5	7.2028578850126198E-4	0.28666679875925699	C: tobramycin_inhal
Stool	Anaerostipes	ursodesoxychols_a_ure	6.4453548087051196E-5	8.8623628619695404E-4	-0.27535405526439299	AD
Stool	Bifidobacterium	ursodesoxychols_a_ure	9.2803075462492801E-6	2.5520845752185502E-4	-0.30412832147089303	OK_sd
Stool	Streptococcus	ursodesoxychols_a_ure	1.07333829906845E-4	1.1806721289753001E-3	0.26722672458505198	AD
Stool	Subdoligranulum	ursodesoxychols_a_ure	1.2768861802059599E-6	7.0228739911327702E-5	-0.33072660743850502	OK_sd
Stool	Eggerthella	ppi	2.1080779875112801E-3	8.91879148562464E-3	-0.213560157928018	C: pseudo_pos_sputum
Stool	Escherichia_Shigella	ppi	4.6211655579323202E-7	2.54164105686278E-5	0.34343848130815802	OK_sd
Stool	Veillonella	ppi	1.3240672588310899E-5	1.8205924808927499E-4	0.29907840745104303	AD
Stool	[Ruminococcus] gnavus group	ppi	2.63555751525298E-4	1.81194579173642E-3	0.25224638789647402	OK_sd
Stool	Anaerostipes	ppi	2.27952691400817E-3	8.9552843050321202E-3	-0.211972062345642	C: ursodesoxychols_a_ure
Stool	Erysipelotrichaceae UCG-003	ppi	2.7760195797335799E-2	6.63830769066725E-2	-0.15372589968212999	C: dn_ase, insulin, ssri, ig_g_g_l
Stool	[Eubacterium] hallii group	ppi	1.0488978952464799E-6	2.8844692119278099E-5	-0.33323132596268801	C: basic_nutrition
Stool	[Ruminococcus] gnavus group	orale_zusatznahrung	2.5054151683854702E-4	6.2580863016570096E-3	0.25433285871658801	OK_sd
Stool	Lactobacillus	nsaid	1.18145607448481E-5	6.4980084096664796E-4	0.30070796267918898	OK_sd
Stool	Dialister	laxantien	1.03006812673375E-8	5.6653746970356099E-7	0.44241118393173101	OK_sd
Stool	Erysipelatoclostridium	acetylcystein	3.5583752202748202E-4	3.2618439519185799E-3	0.247032358661255	C: treatmentdays_365prior_visit, delta_ETI_merged
Stool	Enterococcus	acetylcystein	3.2738131343613598E-10	1.8005972238987501E-8	0.42098173497218599	OK_sd
Stool	Parasutterella	acetylcystein	2.1008822323453101E-2	8.2534659127851406E-2	-0.16111624096524799	AD
Stool	Lachnospira	insulin	4.6332210321246999E-4	4.2471192794476401E-3	-0.33487797343219	AD
Stool	[Ruminococcus] gauvreauii group	insulin	1.1860019712167999E-2	6.1561308243164602E-2	-0.24281742354031499	AD
Stool	Lactococcus	insulin	2.7030727355048102E-3	1.8583625056595599E-2	-0.26784059314179798	AD
Stool	Agathobacter	insulin	1.2312261648632901E-2	6.1561308243164602E-2	-0.25764596848934201	AD
Stool	Ruminococcus	insulin	9.0788642887030705E-5	2.4966876793933398E-3	-0.32777262897744802	AD
Stool	Erysipelotrichaceae UCG-003	insulin	2.35087918272139E-4	3.8000940328023701E-3	-0.360827927092987	C: ssri, ig_g_g_l
Stool	Parasutterella	insulin	2.7637047511289999E-4	3.8000940328023701E-3	-0.33286994130367598	AD
Stool	Anaerostipes	antidiabetic_oral	8.6054168021710599E-4	1.5776597470647E-2	-0.53403141361256601	C: age_y, ursodesoxychols_a_ure, ig_g_g_l, pp_fev_percent
Stool	[Eubacterium] eligens group	ssri	2.1554807728887701E-6	5.9275721254441098E-5	0.482861400894188	OK_sd
Stool	[Ruminococcus] torques group	ssri	6.24833318347206E-4	6.8731665018192702E-3	-0.44287133631395897	OK_sd
Stool	Tuzzerella	ssri	9.9397472285150598E-4	7.8098013938332602E-3	-0.35519125683060099	AD
Stool	Lactococcus	ssri	5.8759546731188498E-3	2.9379773365594199E-2	-0.31197218082464001	AD
Stool	Clostridium sensu stricto 1	ssri	8.7838188632477702E-5	1.2077750936965699E-3	-0.51217088922007004	C: gpt_alat_u_l
Stool	Parabacteroides	ssri	1.24542704316501E-6	5.9275721254441098E-5	-0.60109289617486295	AD
Stool	Erysipelotrichaceae UCG-003	ssri	7.7203930059061801E-5	1.2077750936965699E-3	-0.49180327868852503	C: ig_g_g_l
Stool	Akkermansia	ssri	1.5478128110214401E-2	6.9603586891472002E-2	-0.24192747143566801	AD
Stool	Romboutsia	ssri	2.1148045894879299E-3	1.2923805824648501E-2	-0.398907103825137	C: gpt_alat_u_l
Stool	Monoglobus	treatmentdays_365prior_visit	1.6642954631609499E-2	5.6030902052114202E-2	-0.16790306391326301	C: dn_ase, delta_ETI_merged
Stool	Lachnospiraceae NK4A136 group	treatmentdays_365prior_visit	6.1771647976229197E-3	2.83120053224384E-2	0.191585304631361	OK_sd
Stool	Flavonifractor	treatmentdays_365prior_visit	3.0140184308204E-3	1.6577101369512199E-2	0.20720900047054799	AD
Stool	Anaerostipes	treatmentdays_365prior_visit	3.5090636310419099E-3	1.7545318155209599E-2	-0.203990064746569	C: age_y, dn_ase, ig_g_g_l, pp_fev_percent
Stool	Lachnospiraceae FCS020 group	treatmentdays_365prior_visit	1.89809945353108E-3	1.3049433743026201E-2	-0.21672123209961699	AD
Stool	Collinsella	treatmentdays_365prior_visit	3.7402376145941898E-4	4.1142613760535999E-3	-0.24734229607712799	C: colistin_inhal
Stool	Bifidobacterium	treatmentdays_365prior_visit	2.3263707849548098E-3	1.42167103525016E-2	-0.212585486867086	C: colistin_inhal
Stool	Erysipelatoclostridium	treatmentdays_365prior_visit	4.0991838241127803E-5	7.5151703442067697E-4	0.28370539859225102	OK_sd
Stool	Erysipelotrichaceae UCG-003	treatmentdays_365prior_visit	6.0641907283641598E-5	8.3382622515007097E-4	-0.27762894791539799	OK_sd
Stool	Enterococcus	treatmentdays_365prior_visit	1.9138024619325101E-5	5.2629567703143902E-4	0.29513828569177702	OK_sd
Stool	[Clostridium] innocuum group	treatmentdays_365prior_visit	8.0653957366029396E-3	3.4038889933150601E-2	0.185474942862078	AD
Stool	Parabacteroides	hb_a1c_percent	9.63273492644654E-5	5.2980042095455999E-3	-0.373005249525661	AD
Stool	Anaerostipes	crp_mg_l	1.42441550343835E-4	7.8342852689109403E-3	-0.297169003254109	C: age_y, antidiabetic_oral, treatmentdays_365prior_visit, ig_g_g_l, pp_fev_percent
Stool	[Eubacterium] eligens group	ig_g_g_l	1.3503377261836499E-4	2.4756191646700199E-3	0.26667640224858702	C: ssri, pp_fev_percent
Stool	Flavonifractor	ig_g_g_l	6.1871012918039703E-5	2.4756191646700199E-3	0.279328171850041	C: treatmentdays_365prior_visit
Stool	Anaerostipes	ig_g_g_l	9.3217858723415603E-5	2.4756191646700199E-3	-0.27276100468757403	C: age_y
Stool	Erysipelotrichaceae UCG-003	ig_g_g_l	2.5877078200730398E-4	3.5580982526004301E-3	-0.255632478183209	OK_sd
Stool	Subdoligranulum	ig_g_g_l	3.38624797756416E-3	1.8624363876602899E-2	-0.20626423196979701	OK_sd
Stool	Escherichia_Shigella	calprotectin_amg_g_stuhl	8.4197145456564202E-4	4.6308430001110297E-2	0.308429374395639	AD
Stool	[Eubacterium] eligens group	leukozyten_nl	1.1790368025212199E-3	2.1615674712888999E-2	0.225570402634444	C: azetronam_inhal
Stool	Dorea	leukozyten_nl	4.1457172145141198E-4	1.1400722339913801E-2	-0.244922827267369	OK_sd
Stool	Colidextribacter	gpt_alat_u_l	8.77896004807917E-5	1.60947600881451E-3	0.27046061687995199	AD
Stool	Clostridium sensu stricto 1	gpt_alat_u_l	8.7669108411001507E-5	1.60947600881451E-3	0.27048257448876101	AD
Stool	Haemophilus	gpt_alat_u_l	5.24777142433206E-3	2.6238857121660301E-2	0.19428780880503899	OK_sd
Stool	Romboutsia	gpt_alat_u_l	7.4048664936672502E-5	1.60947600881451E-3	0.273167780606551	OK_sd
Stool	Veillonella	got_asat_u_l	2.9182795016185401E-5	1.3247646068039001E-3	0.28817950417923199	AD
Stool	[Ruminococcus] gnavus group	got_asat_u_l	9.4912558445303002E-4	1.30504767862292E-2	0.22971850663034199	OK_sd
Stool	Lactobacillus	pp_fev_percent	2.06294873174198E-4	1.2606908916201001E-3	-0.25827625969898299	AD
Stool	[Eubacterium] eligens group	pp_fev_percent	1.9048478232816499E-4	1.2606908916201001E-3	-0.259629113689957	C: ssri
Stool	Bilophila	pp_fev_percent	4.2845393160922398E-10	1.1782483119253599E-8	0.42127488127178903	AD
Stool	Ruminococcus	pp_fev_percent	8.6954082603795795E-8	1.1956186358021899E-6	0.365713379092516	C: pseudo_pos_throat
Stool	Anaerostipes	pp_fev_percent	5.0801248808687001E-3	1.6435698143987001E-2	0.19643621162746699	C: age_y, ig_g_g_l
Stool	Akkermansia	pp_fev_percent	1.8209890168717499E-7	2.0030879185589299E-6	0.35709098206516998	AD
Stool	Enterococcus	pp_fev_percent	4.6448506668203099E-4	2.3224253334101501E-3	-0.244069703346942	C: dn_ase, acetylcystein, treatmentdays_365prior_visit
Stool	Odoribacter	pp_fvc_percent	2.2834539388828001E-10	1.2558996663855399E-8	0.42819750940789397	OK_sd
Stool	Bilophila	pp_fvc_percent	8.1141477931666808E-6	1.11569532156042E-4	0.30892944576653297	C: pseudo_pos_sputum
Stool	Gemella	cftr_prior_v1	3.4770877409084103E-4	9.5619912874981301E-3	0.25801332910187202	C: basic_nutrition
Stool	Monoglobus	delta_ETI_merged	4.5113116068037301E-3	5.06709936763651E-2	0.19712657167835701	OK_sd
Stool	Turicibacter	delta_ETI_merged	4.3639898669519598E-4	1.39570371161269E-2	0.242842625619655	OK_sd
Stool	Escherichia_Shigella	delta_ETI_merged	8.1051037554825504E-3	7.0027844385292207E-2	-0.184012979102472	C: BMI
Stool	[Ruminococcus] gnavus group	delta_ETI_merged	1.4402345631645899E-2	7.9212900974052397E-2	-0.17028443784560501	OK_sd
Stool	Erysipelatoclostridium	delta_ETI_merged	3.5270044189933702E-3	5.06709936763651E-2	-0.20240439343790001	OK_sd
Stool	Erysipelotrichaceae UCG-003	delta_ETI_merged	1.21463052116029E-2	7.4227420737573602E-2	0.174450818786339	C: treatmentdays_365prior_visit
Stool	Dorea	delta_ETI_merged	1.01858682742243E-2	7.0027844385292207E-2	0.178666778323265	AD
Stool	Dialister	delta_ETI_merged	5.0752862240461302E-4	1.39570371161269E-2	-0.24014353848011599	OK_sd
Stool	Enterococcus	delta_ETI_merged	4.6064539705786504E-3	5.06709936763651E-2	-0.19667308387545901	OK_sd
Stool	Romboutsia	delta_ETI_merged	9.8647309427929795E-3	7.0027844385292207E-2	0.17942473591254801	C: ssri, gpt_alat_u_l
Stool	Terrisporobacter	basic_nutrition	6.2435838676897198E-5	3.6915693690059198E-4	Inf	OK_nc
Stool	Gemella	basic_nutrition	1.06344978667717E-7	5.8489738267244198E-6	Inf	OK_sd
Stool	Bacteroides	basic_nutrition	1.64117629960607E-5	1.5044116079722299E-4	Inf	OK_sd
Stool	[Eubacterium] hallii group	basic_nutrition	2.5447034945264298E-5	1.9994098885564799E-4	Inf	AD
Stool	Roseburia	basic_nutrition	3.6108660540048799E-5	2.4824704121283598E-4	Inf	C: pseudo_pos_throat
Stool	Dialister	staph_pos_throat	9.2943393813075703E-7	5.1118866597191597E-5	Inf	AD
Stool	Eggerthella	pseudo_pos_sputum	7.23143390693755E-3	7.0354822327172606E-2	Inf	C: tobramycin_inhal
Stool	Flavonifractor	pseudo_pos_sputum	4.2040181494455396E-3	7.0354822327172606E-2	Inf	AD
Stool	Bilophila	pseudo_pos_sputum	8.9963205733566099E-4	4.9479763153461302E-2	Inf	OK_sd
Stool	Incertae Sedis	pseudo_pos_sputum	3.3692216351950801E-3	7.0354822327172606E-2	Inf	AD
Stool	Lachnoclostridium	pseudo_pos_sputum	7.1839479460456901E-3	7.0354822327172606E-2	Inf	AD
Stool	Bacteroides	pseudo_pos_sputum	9.3630071196389598E-3	7.3566484511448899E-2	Inf	OK_sd
Stool	Ruminococcus	pseudo_pos_throat	4.76683255337766E-4	1.34704391105355E-2	Inf	OK_sd
Stool	Dialister	pseudo_pos_throat	5.7215802855369599E-4	1.34704391105355E-2	Inf	AD
Stool	Roseburia	pseudo_pos_throat	7.3475122421102503E-4	1.34704391105355E-2	Inf	AD

## Sheet: Supp_data6
Supplementary Data 6: Tested Variables
Variable	Abbreviation	Explanation
Tobramycin Inhalation
Isotonic NaCl Inhalation
(SABA) Inhaler	SABA	Short-Acting Beta-Agonist
Cortisone Inhalation
Oral Antihistamine
Oral Nutritional Supplement
Laxatives
Antidiabetic Medication (Oral)
Antibiotic 15 Days before Visit
Hb A1c %	Hb A1c	Hemoglobin A1c
Interleukin-8 (pg/ml)	IL-8	Interleukin-8
Leukocyte Count /nl
Lung function (ppFEV1)	ppFEV1	Percent Predicted Forced Expiratory Volume in 1 sec
Total Reads		Library size of the sample
Sex
Age
Levofloxacin Inhalation
Aztreonam Inhalation
Anticholinergic Inhalation
DNAse Inhalation		Deoxyribonuclease
Cortisone Nasal Spray
Nasal Spray
Ursodeoxycholic Acid
Tranexamic Acid
Acetylcysteine
Furosemide
N Antibiotic tt Days		Number of antibiotic treatment days within the last 365 days prior sampling
CRP mg/l	CRP	C-Reactive Protein
IgG g/l	IgG	Immunoglobulin G
GPT/ALAT U/l	GPT/ALAT	Glutamate Pyruvate Transaminase / Alanine Aminotransferase
Lung function (ppFVC)	ppFVC	Percent Predicted Forced Vital Capacity
N ETI tt Days
ID		participants identifier
BMI	BMI	Body Mass Index
Colistin Inhalation
Hypertonic Saline Inhalation
Long-Acting Beta-Agonist (LABA) Inhaler	LABA	Long-Acting Beta-Agonist
Mannitol Inhalation
Cortisone
Sodium suppl.		Sodium Supplement
PPI	PPI	Proton Pump Inhibitor
NSAIDs	NSAIDs	Non-Steroidal Anti-Inflammatory Drugs
Insulin
SSRIs	SSRIs	Selective Serotonin Reuptake Inhibitors
Sweat chloride (mmol/l)
Interleukin-6 (pg/ml)	IL-6	Interleukin-6
Calprotectin (μg/g Stool)
GOT/ASAT U/l	GOT/ASAT	Glutamate Oxaloacetate Transaminase / Aspartate Aminotransferase
prior CFTR-modulator tt	tt	treatment
Mutation (homo- vs heterozygous)
Azithromycin (Oral)
DPI Colistin Inhalation	DPI Colistin	Dry Powder Inhaler Colistin
Bristol Score (stool consistency)
Basic nutrition (omnivore, vegetarian, vegan, gluten-free)
Staphylococcus positive throat
Staphylococcus positive sputum
Pseudomonas positive sputum
Pseudomonas positive throat

## Sheet: Supp_data7
Supplementary Data 7: Effect sizes and significance of taxonomic alterations in comparison to baseline across sample types
Sample type	status	raw_p	comparison_p	effectSize	corr_p	fdr	taxa annotation
Sputum	NS	9.7963790749254404E-2	V1_V2	-0.41666666666666602	0.54376247948805501	ns	Staphylococcus (Genus)
Sputum	OK_nc	1.3230411598492999E-2	V1_V3V5	-0.52136752136752096	6.3505975672766807E-2	.	Staphylococcus (Genus)
Sputum	OK_nc	1.9635159718887998E-3	V1_V6V7	-0.71604938271604901	4.7124383325331302E-2	*	Staphylococcus (Genus)
Sputum	OK_nc	7.6889744016256896E-3	V1_V8V9	-0.62962962962962898	9.2267692819508307E-2	.	Staphylococcus (Genus)
Sputum	NS	0.113283849893344	V1_V2	0.40277777777777701	0.54376247948805501	ns	Gemella (Genus)
Sputum	OK_nc	4.2020805332812702E-3	V1_V3V5	0.61538461538461497	3.3616644266250197E-2	*	Gemella (Genus)
Sputum	NS	2.2068754555364001E-2	V1_V6V7	0.55555555555555503	0.105930021865747	ns	Gemella (Genus)
Sputum	NS	2.2068754555364001E-2	V1_V8V9	0.55555555555555503	0.130771786752616	ns	Gemella (Genus)
Sputum	NS	0.55832052149786804	V1_V2	0.15277777777777701	0.95472238926877895	ns	Granulicatella (Genus)
Sputum	NS	7.7868787704600095E-2	V1_V3V5	0.38034188034187999	0.169895536810036	ns	Granulicatella (Genus)
Sputum	OK_nc	8.0374441354317296E-3	V1_V6V7	0.64197530864197505	9.6449329625180699E-2	.	Granulicatella (Genus)
Sputum	NS	3.2692946688154201E-2	V1_V8V9	0.51851851851851805	0.130771786752616	ns	Granulicatella (Genus)
Sputum	NS	0.219349677582139	V1_V2	0.29861111111111099	0.58493247355237199	ns	Haemophilus (Genus)
Sputum	OK_nc	3.39776853750957E-4	V1_V3V5	0.75641025641025605	4.0773222450114898E-3	*	Haemophilus (Genus)
Sputum	NS	0.13169040062425499	V1_V6V7	0.35185185185185103	0.32283131421850703	ns	Haemophilus (Genus)
Sputum	NS	1.7542466427340201E-2	V1_V8V9	0.561728395061728	0.130771786752616	ns	Haemophilus (Genus)
Sputum	NS	9.5529674055328806E-2	V1_V2	0.40277777777777701	0.54376247948805501	ns	Streptococcus (Genus)
Sputum	OK_nc	1.17870375401854E-2	V1_V3V5	0.52991452991452903	6.3505975672766807E-2	.	Streptococcus (Genus)
Sputum	NS	0.29378951582152601	V1_V6V7	0.24691358024691301	0.58757903164305203	ns	Streptococcus (Genus)
Sputum	NS	0.67762551862682396	V1_V8V9	9.8765432098765399E-2	0.85594802352861998	ns	Streptococcus (Genus)
Sputum	NS	0.17984304010060601	V1_V2	0.29166666666666602	0.58493247355237199	ns	Neisseria (Genus)
Sputum	OK_nc	9.3655655727733705E-5	V1_V3V5	0.79914529914529897	2.2477357374656101E-3	*	Neisseria (Genus)
Sputum	NS	1.5235229798872801E-2	V1_V6V7	0.52469135802469102	0.102563249107871	ns	Neisseria (Genus)
Sputum	OK_nc	7.22037854696277E-4	V1_V8V9	0.75925925925925897	1.73289085127106E-2	*	Neisseria (Genus)
Sputum	NS	9.7963790749254404E-2	V1_V2	-0.41666666666666602	0.46638651965882999	ns	Staphylococcaceae (Family)
Sputum	OK_nc	1.3230411598492999E-2	V1_V3V5	-0.52136752136752096	4.2998837695102501E-2	*	Staphylococcaceae (Family)
Sputum	OK_nc	1.9635159718887998E-3	V1_V6V7	-0.71604938271604901	2.55257076345544E-2	*	Staphylococcaceae (Family)
Sputum	OK_nc	7.6889744016256896E-3	V1_V8V9	-0.62962962962962898	4.9978333610567E-2	*	Staphylococcaceae (Family)
Sputum	OK_nc	6.2729032980749196E-3	V1_V2	0.66666666666666596	8.1547742874973905E-2	.	Streptococcaceae (Family)
Sputum	NS	6.2007298557851802E-2	V1_V3V5	0.401709401709401	0.115156411607439	ns	Streptococcaceae (Family)
Sputum	NS	8.4938951208974101E-2	V1_V6V7	0.41975308641975301	0.22084127314333199	ns	Streptococcaceae (Family)
Sputum	NS	0.403309703263936	V1_V8V9	0.209876543209876	0.65537826780389696	ns	Streptococcaceae (Family)
Sputum	NS	0.93354114395985299	V1_V2	2.77777777777777E-2	0.93354114395985299	ns	Veillonellaceae (Family)
Sputum	OK_nc	3.3845132659848801E-2	V1_V3V5	0.45726495726495697	8.7997344915607095E-2	.	Veillonellaceae (Family)
Sputum	NS	0.110776796250791	V1_V6V7	0.38888888888888801	0.240016391876714	ns	Veillonellaceae (Family)
Sputum	NS	0.30355202832825101	V1_V8V9	0.25308641975308599	0.563739481181038	ns	Veillonellaceae (Family)
Sputum	NS	0.113283849893344	V1_V2	0.40277777777777701	0.46638651965882999	ns	Gemellaceae (Family)
Sputum	OK_nc	4.2020805332812702E-3	V1_V3V5	0.61538461538461497	1.8942100033479001E-2	*	Gemellaceae (Family)
Sputum	OK_nc	2.2068754555364001E-2	V1_V6V7	0.55555555555555503	9.5631269739910693E-2	.	Gemellaceae (Family)
Sputum	OK_nc	2.2068754555364001E-2	V1_V8V9	0.55555555555555503	7.1723452304933002E-2	.	Gemellaceae (Family)
Sputum	NS	0.55832052149786804	V1_V2	0.15277777777777701	0.90727084743403497	ns	Carnobacteriaceae (Family)
Sputum	NS	7.7868787704600095E-2	V1_V3V5	0.38034188034187999	0.12653678001997501	ns	Carnobacteriaceae (Family)
Sputum	OK_nc	8.0374441354317296E-3	V1_V6V7	0.64197530864197505	5.2243386880306199E-2	.	Carnobacteriaceae (Family)
Sputum	OK_nc	3.2692946688154201E-2	V1_V8V9	0.51851851851851805	8.5001661389200997E-2	.	Carnobacteriaceae (Family)
Sputum	NS	0.183505161045352	V1_V2	0.3125	0.47711341871791602	ns	Neisseriaceae (Family)
Sputum	OK_nc	7.2073562014885796E-4	V1_V3V5	0.70512820512820495	9.3695630619351593E-3	*	Neisseriaceae (Family)
Sputum	NS	5.2784010180921402E-2	V1_V6V7	0.44444444444444398	0.17154803308799399	ns	Neisseriaceae (Family)
Sputum	OK_nc	3.0654193189241399E-3	V1_V8V9	0.68518518518518501	3.9850451146013897E-2	*	Neisseriaceae (Family)
Sputum	NS	0.41287800608643099	V1_V2	0.20138888888888801	0.76677343987480095	ns	Pasteurellaceae (Family)
Sputum	OK_nc	4.3712538538797701E-3	V1_V3V5	0.60256410256410198	1.8942100033479001E-2	*	Pasteurellaceae (Family)
Sputum	NS	0.161575330990268	V1_V6V7	0.32716049382716	0.30006847183906898	ns	Pasteurellaceae (Family)
Sputum	OK_nc	2.0213796669469E-2	V1_V8V9	0.54938271604938205	7.1723452304933002E-2	.	Pasteurellaceae (Family)
Sputum	OK_nc	1.11030388375926E-2	V1_V2	0.625	8.8824310700740899E-2	.	Lactobacillales (Order)
Sputum	OK_nc	4.1973337852053802E-2	V1_V3V5	0.43589743589743501	8.3946675704107604E-2	.	Lactobacillales (Order)
Sputum	NS	5.25106015266198E-2	V1_V6V7	0.469135802469135	0.35255594138889301	ns	Lactobacillales (Order)
Sputum	NS	0.34817045654574202	V1_V8V9	0.234567901234567	0.55707273047318795	ns	Lactobacillales (Order)
Sputum	NS	0.93354114395985299	V1_V2	2.77777777777777E-2	0.97666977641125796	ns	Veillonellales-Selenomonsdales (Order)
Sputum	OK_nc	3.3845132659848801E-2	V1_V3V5	0.45726495726495697	8.3946675704107604E-2	.	Veillonellales-Selenomonsdales (Order)
Sputum	NS	0.110776796250791	V1_V6V7	0.38888888888888801	0.35255594138889301	ns	Veillonellales-Selenomonsdales (Order)
Sputum	NS	0.30355202832825101	V1_V8V9	0.25308641975308599	0.55707273047318795	ns	Veillonellales-Selenomonsdales (Order)
Sputum	NS	0.47021310294820801	V1_V2	0.180555555555555	0.62695080393094405	ns	Burkholderiales (Order)
Sputum	OK_nc	1.4215212451818501E-2	V1_V3V5	0.52136752136752096	5.6860849807274003E-2	.	Burkholderiales (Order)
Sputum	NS	0.32452952051261402	V1_V6V7	0.234567901234567	0.51924723282018304	ns	Burkholderiales (Order)
Sputum	NS	5.0832639650096302E-2	V1_V8V9	0.46296296296296302	0.20333055860038499	ns	Burkholderiales (Order)
Sputum	NS	0.41287800608643099	V1_V2	0.20138888888888801	0.62695080393094405	ns	Enterobacterales (Order)
Sputum	OK_nc	4.3712538538797701E-3	V1_V3V5	0.60256410256410198	3.4970030831038099E-2	*	Enterobacterales (Order)
Sputum	NS	0.161575330990268	V1_V6V7	0.32716049382716	0.35255594138889301	ns	Enterobacterales (Order)
Sputum	NS	2.0213796669469E-2	V1_V8V9	0.54938271604938205	0.161710373355752	ns	Enterobacterales (Order)
Stool	NS	3.5998386933911553E-2	V1_V2	-0.3190045248868778	0.95395725374865614	ns	Escherichia_Shigella (Genus)
Stool	OK_nc	9.5943083142974801E-4	V1_V3V5	-0.39551083591331282	5.0849834065776638E-2	.	Escherichia_Shigella (Genus)
Stool	OK_nc	1.749936209089477E-3	V1_V6V7	-0.42499999999999999	4.6373309540871148E-2	*	Escherichia_Shigella (Genus)
Stool	OK_nc	1.395589955961329E-3	V1_V8V9	-0.46666666666666662	5.3721786741579187E-2	.	Escherichia_Shigella (Genus)
Stool	OK_nc	8.9499359746678774E-11	V1_Control	-0.84967320261437906	2.371733033286988E-9	*	Escherichia_Shigella (Genus)
Stool	NS	0.94647134642728792	V1_V2	-1.1312217194570149E-2	0.99387404090340203		Bacteroides (Genus)
Stool	NS	0.92014013848746434	V1_V3V5	-1.238390092879255E-2	0.98553826166067882		Bacteroides (Genus)
Stool	NS	6.284077021414472E-2	V1_V6V7	-0.25294117647058822	0.32717275472523721		Bacteroides (Genus)
Stool	NS	0.43121321789899208	V1_V8V9	-0.115686274509804	0.87195640966748833		Bacteroides (Genus)
Stool	OK_nc	1.387313472518213E-2	V1_Control	-0.32549019607843133	2.9411045617386129E-2	*	Bacteroides (Genus)
Stool	NS	0.6784066150442899	V1_V2	-6.1085972850678738E-2	0.99387404090340203		Enterococcus (Genus)
Stool	NS	3.1969568702794243E-2	V1_V3V5	-0.23529411764705879	0.5599484688447649		Enterococcus (Genus)
Stool	NS	1.754019422032025E-2	V1_V6V7	-0.29411764705882348	0.1549383822794955		Enterococcus (Genus)
Stool	OK_nc	8.2056757108072559E-3	V1_V8V9	-0.34705882352941181	7.2483468778797439E-2	.	Enterococcus (Genus)
Stool	OK_nc	8.4794369129307004E-8	V1_Control	-0.55947712418300655	1.4980338546177571E-6	*	Enterococcus (Genus)
Stool	NS	0.43637882078944312	V1_V2	0.1199095022624435	0.99387404090340203		Streptococcus (Genus)
Stool	NS	0.52404778081468062	V1_V3V5	7.6625386996904021E-2	0.88423938609606478		Streptococcus (Genus)
Stool	NS	5.5224531349690582E-2	V1_V6V7	0.26029411764705879	0.32717275472523721		Streptococcus (Genus)
Stool	NS	0.71328164375619207	V1_V8V9	5.4901960784313752E-2	0.93456600719983085		Streptococcus (Genus)
Stool	OK_nc	1.722804427967647E-6	V1_Control	-0.60653594771241837	1.30440906688979E-5	*	Streptococcus (Genus)
Stool	NS	0.20932386530089969	V1_V2	-0.1900452488687783	0.99387404090340203		Faecalibacterium (Genus)
Stool	NS	0.59535358023113161	V1_V3V5	-6.3467492260061931E-2	0.88423938609606478		Faecalibacterium (Genus)
Stool	NS	0.12859331358061471	V1_V6V7	-0.20441176470588229	0.47335826827625971		Faecalibacterium (Genus)
Stool	NS	0.86519781825991515	V1_V8V9	-2.549019607843139E-2	0.93456600719983085		Faecalibacterium (Genus)
Stool	OK_nc	1.511016326402529E-4	V1_Control	0.50065359477124183	4.7108156058431788E-4	*	Faecalibacterium (Genus)
Stool	NS	0.48301014781355328	V1_V2	0.10746606334841639	0.99387404090340203		Veillonella (Genus)
Stool	NS	0.2321297612696584	V1_V3V5	0.1431888544891641	0.76892983420574335		Veillonella (Genus)
Stool	NS	0.21351614013610051	V1_V6V7	0.16911764705882351	0.49070405239682818		Veillonella (Genus)
Stool	NS	0.54913092422082044	V1_V8V9	8.8235294117647023E-2	0.87195640966748833		Veillonella (Genus)
Stool	OK_nc	6.0517846568139593E-11	V1_Control	-0.83790849673202616	2.371733033286988E-9	*	Veillonella (Genus)
Stool	NS	0.3587818551236962	V1_V2	0.14027149321266971	0.99387404090340203		Clostridium sensu stricto 1 (Genus)
Stool	NS	0.30743488425589099	V1_V3V5	-0.12229102167182659	0.81586509596088252		Clostridium sensu stricto 1 (Genus)
Stool	NS	7.2459993223632432E-2	V1_V6V7	0.24411764705882361	0.32717275472523721		Clostridium sensu stricto 1 (Genus)
Stool	NS	0.87696794268321276	V1_V8V9	-2.3529411764705851E-2	0.93456600719983085		Clostridium sensu stricto 1 (Genus)
Stool	OK_nc	1.3778504654380741E-3	V1_Control	-0.42091503267973862	3.6513037334108961E-3	*	Clostridium sensu stricto 1 (Genus)
Stool	NS	0.73121753518617782	V1_V2	-5.3167420814479671E-2	0.99387404090340203		Agathobacter (Genus)
Stool	NS	0.94834813857914368	V1_V3V5	8.1269349845201067E-3	0.98553826166067882		Agathobacter (Genus)
Stool	NS	0.36165126970505251	V1_V6V7	-0.124264705882353	0.6344151628874225		Agathobacter (Genus)
Stool	NS	0.374119661004788	V1_V8V9	0.13039215686274511	0.87195640966748833		Agathobacter (Genus)
Stool	OK_nc	1.138949720029134E-3	V1_Control	0.43006535947712421	3.1770702716602162E-3	*	Agathobacter (Genus)
Stool	NS	0.269126535281208	V1_V2	-0.167420814479638	0.99387404090340203		[Ruminococcus] gnavus group (Genus)
Stool	NS	0.50659492895340508	V1_V3V5	-7.9334365325077427E-2	0.88423938609606478		[Ruminococcus] gnavus group (Genus)
Stool	NS	0.38304311721504758	V1_V6V7	-0.1176470588235294	0.6344151628874225		[Ruminococcus] gnavus group (Genus)
Stool	OK_nc	5.0680930888282252E-3	V1_V8V9	-0.40490196078431367	5.3721786741579187E-2	.	[Ruminococcus] gnavus group (Genus)
Stool	OK_nc	8.2898853612030435E-7	V1_Control	-0.61699346405228761	7.3227320690626893E-6	*	[Ruminococcus] gnavus group (Genus)
Stool	NS	0.99278854341094691	V1_V2	-2.2624434389140191E-3	0.99387404090340203		Ruminococcus (Genus)
Stool	NS	0.77696076669981395	V1_V3V5	2.786377708978327E-2	0.98553826166067882		Ruminococcus (Genus)
Stool	NS	0.67747403587854582	V1_V6V7	-4.5588235294117652E-2	0.82515399635402698		Ruminococcus (Genus)
Stool	NS	0.90059097637084207	V1_V8V9	-1.5686274509803949E-2	0.93590826956185558		Ruminococcus (Genus)
Stool	OK_nc	1.8235179165408539E-4	V1_Control	0.46405228758169942	5.3692471987036247E-4	*	Ruminococcus (Genus)
Stool	NS	0.97559048582878449	V1_V2	5.6561085972850478E-3	0.99387404090340203		Subdoligranulum (Genus)
Stool	NS	0.42311681065935092	V1_V3V5	9.4814241486068096E-2	0.85585754059001706		Subdoligranulum (Genus)
Stool	NS	0.34101152441788612	V1_V6V7	-0.125	0.6344151628874225		Subdoligranulum (Genus)
Stool	NS	0.84655798646573455	V1_V8V9	2.8431372549019559E-2	0.93456600719983085		Subdoligranulum (Genus)
Stool	OK_nc	7.6985554110985722E-7	V1_Control	0.65098039215686276	7.3227320690626893E-6	*	Subdoligranulum (Genus)
Stool	NS	0.78416767058386072	V1_V2	4.298642533936653E-2	0.99387404090340203		Lachnoclostridium (Genus)
Stool	NS	0.87917955579113327	V1_V3V5	1.857585139318885E-2	0.98553826166067882		Lachnoclostridium (Genus)
Stool	NS	0.16832360256448711	V1_V6V7	-0.1875	0.49070405239682818		Lachnoclostridium (Genus)
Stool	NS	0.49258396916892389	V1_V8V9	-0.1009803921568628	0.87195640966748833		Lachnoclostridium (Genus)
Stool	OK_nc	5.5742273892606548E-5	V1_Control	-0.53267973856209139	1.8464628226925919E-4	*	Lachnoclostridium (Genus)
Stool	NS	0.53812801753385386	V1_V2	-9.2760180995475117E-2	0.99387404090340203		Erysipelatoclostridium (Genus)
Stool	NS	0.26204601828039681	V1_V3V5	-0.12925696594427241	0.77362439065084676		Erysipelatoclostridium (Genus)
Stool	NS	0.14290060929094631	V1_V6V7	-0.19264705882352939	0.47335826827625971		Erysipelatoclostridium (Genus)
Stool	OK_nc	4.8304428659018718E-3	V1_V8V9	-0.39215686274509798	5.3721786741579187E-2	.	Erysipelatoclostridium (Genus)
Stool	OK_nc	1.7387111150612031E-7	V1_Control	-0.6026143790849674	2.3037922274560939E-6	*	Erysipelatoclostridium (Genus)
Stool	NS	0.49610381307465662	V1_V2	9.9547511312217174E-2	0.99387404090340203		Parabacteroides (Genus)
Stool	NS	0.90202028125478029	V1_V3V5	1.4318885448916409E-2	0.98553826166067882		Parabacteroides (Genus)
Stool	NS	0.41367407286011149	V1_V6V7	-0.1044117647058823	0.64484487828193859		Parabacteroides (Genus)
Stool	NS	0.84703414025260892	V1_V8V9	-2.7450980392156821E-2	0.93456600719983085		Parabacteroides (Genus)
Stool	OK_nc	4.4810064227226942E-2	V1_Control	0.26078431372549032	7.9164446801434266E-2	.	Parabacteroides (Genus)
Stool	NS	0.92698487505685367	V1_V2	-1.357466063348417E-2	0.99387404090340203		Erysipelotrichaceae UCG-003 (Genus)
Stool	NS	0.16815884046398061	V1_V3V5	0.15634674922600619	0.75286427658805555		Erysipelotrichaceae UCG-003 (Genus)
Stool	NS	0.13931190580565819	V1_V6V7	0.18823529411764711	0.47335826827625971		Erysipelotrichaceae UCG-003 (Genus)
Stool	NS	3.5931222170644719E-2	V1_V8V9	0.29215686274509811	0.21159497500490779		Erysipelotrichaceae UCG-003 (Genus)
Stool	OK_nc	6.1988345430461526E-6	V1_Control	0.59084967320261439	3.6504247864605131E-5	*	Erysipelotrichaceae UCG-003 (Genus)
Stool	NS	0.84037340747776756	V1_V2	-3.1674208144796323E-2	0.99387404090340203		Dorea (Genus)
Stool	NS	0.21307479526077039	V1_V3V5	0.14938080495356029	0.75286427658805555		Dorea (Genus)
Stool	NS	0.19119752331227971	V1_V6V7	0.1779411764705883	0.49070405239682818		Dorea (Genus)
Stool	NS	2.5084238439887881E-2	V1_V8V9	0.32745098039215692	0.18992351961629389		Dorea (Genus)
Stool	OK_nc	3.7131858650092768E-2	V1_Control	-0.27581699346405231	7.0285303873389882E-2	.	Dorea (Genus)
Stool	NS	0.71309969221586944	V1_V2	3.7330316742081433E-2	0.99387404090340203		Limosilactobacillus (Genus)
Stool	NS	0.72738192543341951	V1_V3V5	2.786377708978327E-2	0.98553826166067882		Limosilactobacillus (Genus)
Stool	NS	0.72266181234654625	V1_V6V7	3.1617647058823528E-2	0.85113502343037672		Limosilactobacillus (Genus)
Stool	NS	0.44099100996548041	V1_V8V9	7.7450980392156865E-2	0.87195640966748833		Limosilactobacillus (Genus)
Stool	OK_nc	3.9538443100093697E-2	V1_Control	-0.1254901960784314	7.2259913251895375E-2	.	Limosilactobacillus (Genus)
Stool	NS	0.81697644136074477	V1_V2	2.7149321266968309E-2	0.99387404090340203		Akkermansia (Genus)
Stool	NS	0.40728640476920058	V1_V3V5	7.8173374613003083E-2	0.85585754059001706		Akkermansia (Genus)
Stool	NS	0.17950694011321361	V1_V6V7	0.15	0.49070405239682818		Akkermansia (Genus)
Stool	NS	0.12341020886625451	V1_V8V9	0.18235294117647061	0.52766336009851178		Akkermansia (Genus)
Stool	OK_nc	9.2550074998464828E-3	V1_Control	0.30326797385620918	2.0438141562160981E-2	*	Akkermansia (Genus)
Stool	NS	0.59763263272103462	V1_V2	-7.9185520361990946E-2	0.99387404090340203		Dialister (Genus)
Stool	NS	9.899136290826048E-2	V1_V3V5	-0.1857585139318885	0.75286427658805555		Dialister (Genus)
Stool	OK_nc	2.7052092734636221E-3	V1_V6V7	-0.37647058823529411	4.7792030497857317E-2	*	Dialister (Genus)
Stool	NS	3.3710266534010561E-2	V1_V8V9	-0.29411764705882348	0.21159497500490779		Dialister (Genus)
Stool	NS	0.93009176509292224	V1_Control	-1.176470588235295E-2	0.94797814519086299		Dialister (Genus)
Stool	NS	0.2128090940863053	V1_V2	0.14819004524886881	0.99387404090340203		Alistipes (Genus)
Stool	NS	0.15498169656036709	V1_V3V5	0.13970588235294121	0.75286427658805555		Alistipes (Genus)
Stool	NS	0.956891316108884	V1_V6V7	5.8823529411764766E-3	0.98042977480427718		Alistipes (Genus)
Stool	NS	0.82339120420241951	V1_V8V9	2.4509803921568651E-2	0.93456600719983085		Alistipes (Genus)
Stool	OK_nc	2.7818311286935929E-5	V1_Control	0.52222222222222214	1.1341311524673879E-4	*	Alistipes (Genus)
Stool	NS	0.922664537119118	V1_V2	-1.5837104072398189E-2	0.99387404090340203		[Eubacterium] hallii group (Genus)
Stool	NS	0.66615565767742513	V1_V3V5	-5.1857585139318867E-2	0.95422296910550086		[Eubacterium] hallii group (Genus)
Stool	NS	0.45039537308355071	V1_V6V7	0.1029411764705882	0.68202727924080531		[Eubacterium] hallii group (Genus)
Stool	NS	0.95167869130297511	V1_V8V9	9.8039215686274717E-3	0.96998020459726297		[Eubacterium] hallii group (Genus)
Stool	OK_nc	4.9197072686896187E-2	V1_Control	-0.26013071895424839	8.4111124271145102E-2	.	[Eubacterium] hallii group (Genus)
Stool	NS	0.44533697376129949	V1_V2	-0.1131221719457013	0.99387404090340203		Lachnospiraceae ND3007 group (Genus)
Stool	NS	0.4332802556562092	V1_V3V5	9.2879256965944235E-2	0.85585754059001706		Lachnospiraceae ND3007 group (Genus)
Stool	NS	0.19697549448488549	V1_V6V7	-0.16911764705882351	0.49070405239682818		Lachnospiraceae ND3007 group (Genus)
Stool	NS	0.82018196782413488	V1_V8V9	-3.3333333333333333E-2	0.93456600719983085		Lachnospiraceae ND3007 group (Genus)
Stool	OK_nc	4.7565512539466038E-6	V1_Control	0.60261437908496729	3.1512152057396248E-5	*	Lachnospiraceae ND3007 group (Genus)
Stool	NS	0.48244437199772572	V1_V2	9.0497737556561098E-2	0.99387404090340203		Haemophilus (Genus)
Stool	NS	7.6400324838075698E-2	V1_V3V5	0.19040247678018579	0.75286427658805555		Haemophilus (Genus)
Stool	NS	2.9892063344203881E-2	V1_V6V7	0.26470588235294118	0.22632562246325799		Haemophilus (Genus)
Stool	NS	0.47969474313747662	V1_V8V9	8.8235294117647051E-2	0.87195640966748833		Haemophilus (Genus)
Stool	OK_nc	3.2127346199207381E-2	V1_Control	0.26143790849673199	6.404766675606624E-2	.	Haemophilus (Genus)
Stool	NS	3.4343855143027097E-2	V1_V2	0.3190045248868778	0.95395725374865614		Romboutsia (Genus)
Stool	NS	0.1290138285190576	V1_V3V5	0.17956656346749231	0.75286427658805555		Romboutsia (Genus)
Stool	NS	8.7942086900889647E-3	V1_V6V7	0.35294117647058831	0.11652326514367881		Romboutsia (Genus)
Stool	OK_nc	2.513162248003401E-3	V1_V8V9	0.43725490196078431	5.3721786741579187E-2	.	Romboutsia (Genus)
Stool	OK_nc	2.0034275271285982E-5	V1_Control	0.56209150326797386	8.8484715781513083E-5	*	Romboutsia (Genus)
Stool	NS	0.71309969221586944	V1_V2	3.7330316742081433E-2	0.99387404090340203		Phascolarctobacterium (Genus)
Stool	NS	0.93274723688724759	V1_V3V5	-6.5789473684210453E-3	0.98553826166067882		Phascolarctobacterium (Genus)
Stool	NS	0.96505047345479555	V1_V6V7	-4.411764705882365E-3	0.98042977480427718		Phascolarctobacterium (Genus)
Stool	NS	0.84995091109278986	V1_V8V9	-1.7647058823529418E-2	0.93456600719983085		Phascolarctobacterium (Genus)
Stool	OK_nc	4.7979074302694448E-3	V1_Control	0.30784313725490198	1.155859517292184E-2	*	Phascolarctobacterium (Genus)
Stool	NS	0.96711167534838405	V1_V2	-6.7873303167420573E-3	0.99387404090340203		Lactobacillus (Genus)
Stool	NS	0.13599046930501721	V1_V3V5	-0.14783281733746129	0.75286427658805555		Lactobacillus (Genus)
Stool	NS	0.34880045345137572	V1_V6V7	-0.11029411764705881	0.6344151628874225		Lactobacillus (Genus)
Stool	NS	0.34129174234664739	V1_V8V9	-0.1215686274509804	0.87195640966748833		Lactobacillus (Genus)
Stool	OK_nc	1.6753677900758799E-5	V1_Control	-0.38954248366013072	8.0722266249110558E-5	*	Lactobacillus (Genus)
Stool	NS	0.99387404090340203	V1_V2	2.2624434389140751E-3	0.99387404090340203		Monoglobus (Genus)
Stool	NS	0.17307163882240351	V1_V3V5	0.1609907120743034	0.75286427658805555		Monoglobus (Genus)
Stool	NS	7.407685012646878E-2	V1_V6V7	0.23970588235294121	0.32717275472523721		Monoglobus (Genus)
Stool	NS	6.6717083286847945E-2	V1_V8V9	0.26470588235294118	0.35360054142029412		Monoglobus (Genus)
Stool	OK_nc	4.4097411882042112E-5	V1_Control	0.53725490196078429	1.558108553165488E-4	*	Monoglobus (Genus)
Stool	NS	0.17961855536397281	V1_V2	-0.2036199095022625	0.99387404090340203		[Ruminococcus] torques group (Genus)
Stool	OK_nc	3.1366769409253261E-3	V1_V3V5	-0.35061919504643962	8.3121938934521147E-2	.	[Ruminococcus] torques group (Genus)
Stool	NS	0.1232712806906188	V1_V6V7	-0.20882352941176471	0.47335826827625971		[Ruminococcus] torques group (Genus)
Stool	NS	0.54358729095474234	V1_V8V9	-8.921568627450982E-2	0.87195640966748833		[Ruminococcus] torques group (Genus)
Stool	OK_nc	3.2628056649316763E-2	V1_Control	-0.28235294117647058	6.404766675606624E-2	.	[Ruminococcus] torques group (Genus)
Stool	NS	0.15351478466585941	V1_V2	0.20361990950226239	0.99387404090340203		Turicibacter (Genus)
Stool	NS	4.2260261799604897E-2	V1_V3V5	0.2337461300309597	0.5599484688447649		Turicibacter (Genus)
Stool	OK_nc	7.1335245553658805E-4	V1_V6V7	0.44558823529411767	3.7807680143439167E-2	*	Turicibacter (Genus)
Stool	OK_nc	5.0088207848084966E-3	V1_V8V9	0.396078431372549	5.3721786741579187E-2	.	Turicibacter (Genus)
Stool	NS	0.4326659909395778	V1_Control	9.6732026143790839E-2	0.5095843893288361		Turicibacter (Genus)
Stool	NS	0.4551657308844449	V1_V2	-9.6153846153846173E-2	0.99387404090340203		Tuzzerella (Genus)
Stool	NS	0.5720031036387323	V1_V3V5	-5.727554179566563E-2	0.88423938609606478		Tuzzerella (Genus)
Stool	NS	0.47316225882471852	V1_V6V7	-8.1617647058823517E-2	0.6838349592455184		Tuzzerella (Genus)
Stool	NS	0.88166604452814223	V1_V8V9	-1.9607843137254891E-2	0.93456600719983085		Tuzzerella (Genus)
Stool	OK_nc	3.6589073537305671E-5	V1_Control	-0.3633986928104575	1.3851577839122859E-4	*	Tuzzerella (Genus)
Stool	NS	0.76639471017610894	V1_V2	-3.6199095022624438E-2	0.99387404090340203		CAG-56 (Genus)
Stool	NS	0.83875661975982108	V1_V3V5	2.0123839009287912E-2	0.98553826166067882		CAG-56 (Genus)
Stool	NS	0.84793527300201454	V1_V6V7	2.2058823529411738E-2	0.93626186393972444		CAG-56 (Genus)
Stool	NS	0.51392761049163194	V1_V8V9	8.039215686274509E-2	0.87195640966748833		CAG-56 (Genus)
Stool	OK_nc	2.9619226315105271E-3	V1_Control	0.36862745098039218	7.4753285461932346E-3	*	CAG-56 (Genus)
Stool	NS	0.42990163866037517	V1_V2	-6.7873303167420809E-2	0.99387404090340203		Ligilactobacillus (Genus)
Stool	NS	0.47330546949229702	V1_V3V5	-4.682662538699689E-2	0.86500654769281871		Ligilactobacillus (Genus)
Stool	NS	0.3980392333278146	V1_V6V7	-6.2500000000000014E-2	0.63927513231436883		Ligilactobacillus (Genus)
Stool	NS	0.1294268619109557	V1_V8V9	-0.1127450980392157	0.52766336009851178		Ligilactobacillus (Genus)
Stool	OK_nc	8.6000978755485132E-3	V1_Control	-0.1470588235294118	1.981761684365527E-2	*	Ligilactobacillus (Genus)
Stool	NS	0.56378062201587475	V1_V2	8.0316742081447956E-2	0.99387404090340203		ASV1550_Megasphaera (Genus)
Stool	NS	0.31759284472376392	V1_V3V5	0.1087461300309597	0.81586509596088252		ASV1550_Megasphaera (Genus)
Stool	NS	0.17142859329862689	V1_V6V7	0.17205882352941179	0.49070405239682818		ASV1550_Megasphaera (Genus)
Stool	NS	0.38093755208559582	V1_V8V9	0.1156862745098039	0.87195640966748833		ASV1550_Megasphaera (Genus)
Stool	OK_nc	7.546609596305537E-6	V1_Control	-0.38235294117647062	3.9997030860419353E-5	*	ASV1550_Megasphaera (Genus)
Stool	NS	0.13362723916949781	V1_V2	-0.22850678733031679	0.53450895667799114		Gammaproteobacteria (Class)
Stool	OK_nc	1.154238316764781E-2	V1_V3V5	-0.30263157894736842	9.2339065341182469E-2	.	Gammaproteobacteria (Class)
Stool	OK_nc	1.203365061520281E-2	V1_V6V7	-0.34117647058823519	9.6269204921622484E-2	.	Gammaproteobacteria (Class)
Stool	NS	3.6689720774534848E-2	V1_V8V9	-0.30831643002028403	0.29351776619627878		Gammaproteobacteria (Class)
Stool	OK_nc	1.4920750868390109E-9	V1_Control	-0.79869281045751639	1.193660069471209E-8	*	Gammaproteobacteria (Class)
Stool	NS	0.52605854669757424	V1_V2	9.728506787330321E-2	0.71406028772557628		Bacteroidia (Class)
Stool	NS	0.82845429054569619	V1_V3V5	2.631578947368424E-2	0.98708778870110203		Bacteroidia (Class)
Stool	NS	6.9240636171234562E-2	V1_V6V7	-0.2470588235294118	0.18464169645662551		Bacteroidia (Class)
Stool	NS	0.76159862251231614	V1_V8V9	-4.5638945233265733E-2	0.76159862251231614		Bacteroidia (Class)
Stool	OK_nc	1.219004024394784E-2	V1_Control	-0.32941176470588229	2.2808521127687321E-2	*	Bacteroidia (Class)
Stool	NS	0.73902665935849787	V1_V2	-5.2036199095022662E-2	0.81697644136074477		Bacilli (Class)
Stool	NS	0.88939790009176967	V1_V3V5	1.7027863777089761E-2	0.98708778870110203		Bacilli (Class)
Stool	NS	5.5224531349690582E-2	V1_V6V7	0.26029411764705879	0.18464169645662551		Bacilli (Class)
Stool	NS	0.56036904528810538	V1_V8V9	8.7221095334685639E-2	0.7471587270508071		Bacilli (Class)
Stool	OK_nc	4.7308045820576751E-4	V1_Control	-0.45359477124183012	1.89232183282307E-3	*	Bacilli (Class)
Stool	NS	0.1026702700982549	V1_V2	0.24886877828054299	0.53450895667799114		Negativicutes (Class)
Stool	NS	0.17333857306121581	V1_V3V5	0.16331269349845209	0.69335429224486322		Negativicutes (Class)
Stool	NS	0.19615254839037599	V1_V6V7	0.17647058823529421	0.31384407742460158		Negativicutes (Class)
Stool	NS	0.39902131727733459	V1_V8V9	0.12576064908722109	0.7471587270508071		Negativicutes (Class)
Stool	OK_nc	1.425532570480457E-2	V1_Control	-0.32418300653594773	2.2808521127687321E-2	*	Negativicutes (Class)
Stool	NS	0.81697644136074477	V1_V2	2.7149321266968309E-2	0.81697644136074477		Verrucomicrobiae (Class)
Stool	NS	0.40728640476920058	V1_V3V5	7.8173374613003083E-2	0.87200579607284756		Verrucomicrobiae (Class)
Stool	NS	0.17950694011321361	V1_V6V7	0.15	0.31384407742460158		Verrucomicrobiae (Class)
Stool	NS	0.18009713022933621	V1_V8V9	0.15821501014198791	0.72038852091734473		Verrucomicrobiae (Class)
Stool	OK_nc	9.2550074998464828E-3	V1_Control	0.30326797385620918	2.2808521127687321E-2	*	Verrucomicrobiae (Class)
Stool	NS	0.13362723916949781	V1_V2	-0.22850678733031679	0.66813619584748896		Proteobacteria (Phylum)
Stool	OK_nc	1.154238316764781E-2	V1_V3V5	-0.30263157894736842	5.7711915838239043E-2	.	Proteobacteria (Phylum)
Stool	OK_nc	1.203365061520281E-2	V1_V6V7	-0.34117647058823519	6.0168253076014047E-2	.	Proteobacteria (Phylum)
Stool	NS	3.6689720774534848E-2	V1_V8V9	-0.30831643002028403	0.18344860387267431		Proteobacteria (Phylum)
Stool	OK_nc	1.4920750868390109E-9	V1_Control	-0.79869281045751639	7.4603754341950551E-9	*	Proteobacteria (Phylum)
Stool	NS	0.52605854669757424	V1_V2	9.728506787330321E-2	0.81697644136074477		Bacteroidota (Phylum)
Stool	NS	0.82845429054569619	V1_V3V5	2.631578947368424E-2	0.82845429054569619		Bacteroidota (Phylum)
Stool	NS	6.9240636171234562E-2	V1_V6V7	-0.2470588235294118	0.11540106028539091		Bacteroidota (Phylum)
Stool	NS	0.76159862251231614	V1_V8V9	-4.5638945233265733E-2	0.89574696774501428		Bacteroidota (Phylum)
Stool	OK_nc	1.219004024394784E-2	V1_Control	-0.32941176470588229	2.0316733739913068E-2	*	Bacteroidota (Phylum)
Stool	NS	0.81697644136074477	V1_V2	2.7149321266968309E-2	0.81697644136074477		Verrucomicrobiota (Phylum)
Stool	NS	0.40728640476920058	V1_V3V5	7.8173374613003083E-2	0.82845429054569619		Verrucomicrobiota (Phylum)
Stool	NS	0.17950694011321361	V1_V6V7	0.15	0.22438367514151711		Verrucomicrobiota (Phylum)
Stool	NS	0.18009713022933621	V1_V8V9	0.15821501014198791	0.36466504346071421		Verrucomicrobiota (Phylum)
Stool	OK_nc	9.2550074998464828E-3	V1_Control	0.30326797385620918	2.0316733739913068E-2	*	Verrucomicrobiota (Phylum)
Stool	NS	0.13753705174817071	V1_V2	-0.22624434389140269	0.73028893062843026		Enterobacterales (Order)
Stool	NS	1.4616351450553171E-2	V1_V3V5	-0.29256965944272451	0.2192452717582975		Enterobacterales (Order)
Stool	NS	3.3035016710418807E-2	V1_V6V7	-0.2897058823529412	0.18519212531617199		Enterobacterales (Order)
Stool	NS	2.3295522771013811E-2	V1_V8V9	-0.33468559837728201	0.1747164207826036		Enterobacterales (Order)
Stool	OK_nc	2.3916469566412462E-9	V1_Control	-0.78823529411764703	1.793735217480934E-8	*	Enterobacterales (Order)
Stool	NS	0.52605854669757424	V1_V2	9.728506787330321E-2	0.73028893062843026		Bacteroidales (Order)
Stool	NS	0.82845429054569619	V1_V3V5	2.631578947368424E-2	0.9559087967834955		Bacteroidales (Order)
Stool	NS	6.9240636171234562E-2	V1_V6V7	-0.2470588235294118	0.18519212531617199		Bacteroidales (Order)
Stool	NS	0.76159862251231614	V1_V8V9	-4.5638945233265733E-2	0.86697677521056693		Bacteroidales (Order)
Stool	OK_nc	1.219004024394784E-2	V1_Control	-0.32941176470588229	1.828506036592176E-2	*	Bacteroidales (Order)
Stool	NS	0.87648085037628276	V1_V2	-2.4886877828054269E-2	0.96331424198450466		Lactobacillales (Order)
Stool	NS	0.94070467744166963	V1_V3V5	-9.287925696594479E-3	0.98708778870110203		Lactobacillales (Order)
Stool	NS	0.25872100986312152	V1_V6V7	0.1544117647058823	0.48510189349335292		Lactobacillales (Order)
Stool	NS	0.76845773028055542	V1_V8V9	4.4624746450304231E-2	0.86697677521056693		Lactobacillales (Order)
Stool	OK_nc	1.7201998399730751E-10	V1_Control	-0.77647058823529402	2.5802997599596129E-9	*	Lactobacillales (Order)
Stool	NS	0.5096191632407735	V1_V2	-0.10180995475113119	0.73028893062843026		Lachnospirales (Order)
Stool	NS	0.686020082253462	V1_V3V5	4.8761609907120702E-2	0.9559087967834955		Lachnospirales (Order)
Stool	NS	0.62363082658146929	V1_V6V7	6.7647058823529393E-2	0.79025749882691121		Lachnospirales (Order)
Stool	NS	0.59790758797748478	V1_V8V9	7.9107505070993955E-2	0.86697677521056693		Lachnospirales (Order)
Stool	OK_nc	2.3071410037476231E-2	V1_Control	-0.29934640522875822	3.1461013687467593E-2	*	Lachnospirales (Order)
Stool	NS	0.34312600647165009	V1_V2	-0.14479638009049769	0.73028893062843026		Oscillospirales (Order)
Stool	NS	0.39843858680728511	V1_V3V5	0.1013931888544891	0.81750543381829455		Oscillospirales (Order)
Stool	NS	0.37057584408752042	V1_V6V7	-0.1220588235294118	0.5735798802174551		Oscillospirales (Order)
Stool	NS	0.29748568365518208	V1_V8V9	0.15415821501014201	0.73227991864011588		Oscillospirales (Order)
Stool	OK_nc	5.2679754237802932E-8	V1_Control	0.71895424836601318	2.6339877118901459E-7	*	Oscillospirales (Order)
Stool	NS	0.47395691782954408	V1_V2	0.1097285067873304	0.73028893062843026		Veillonellales-Selenomonadales (Order)
Stool	NS	0.2263629666358902	V1_V3V5	0.14512383900928799	0.81750543381829455		Veillonellales-Selenomonadales (Order)
Stool	NS	0.38238658681163668	V1_V6V7	0.11911764705882361	0.5735798802174551		Veillonellales-Selenomonadales (Order)
Stool	NS	0.73025245993550425	V1_V8V9	5.1724137931034531E-2	0.86697677521056693		Veillonellales-Selenomonadales (Order)
Stool	OK_nc	2.5518647355195413E-4	V1_Control	-0.481045751633987	7.6555942065586221E-4	*	Veillonellales-Selenomonadales (Order)
Stool	NS	0.3587818551236962	V1_V2	0.14027149321266971	0.73028893062843026		Clostridiales (Order)
Stool	NS	0.30743488425589099	V1_V3V5	-0.12229102167182659	0.81750543381829455		Clostridiales (Order)
Stool	NS	7.2459993223632432E-2	V1_V6V7	0.24411764705882361	0.18519212531617199		Clostridiales (Order)
Stool	NS	0.80917832352986252	V1_V8V9	-3.6511156186612548E-2	0.86697677521056693		Clostridiales (Order)
Stool	OK_nc	1.3778504654380741E-3	V1_Control	-0.42091503267973862	3.119671664191255E-3	*	Clostridiales (Order)
Stool	NS	0.89909329251887105	V1_V2	-2.0361990950226231E-2	0.96331424198450466		Erysipelotrichales (Order)
Stool	NS	0.19025053207046619	V1_V3V5	0.15712074303405571	0.81750543381829455		Erysipelotrichales (Order)
Stool	NS	9.9930915826789441E-3	V1_V6V7	0.35	0.14989637374018419		Erysipelotrichales (Order)
Stool	NS	1.550985921666986E-2	V1_V8V9	0.35699797160243402	0.1747164207826036		Erysipelotrichales (Order)
Stool	OK_nc	1.455846776622585E-3	V1_Control	0.42091503267973862	3.119671664191255E-3	*	Erysipelotrichales (Order)
Stool	NS	0.81697644136074477	V1_V2	2.7149321266968309E-2	0.96331424198450466		Verrucomicrobiales (Order)
Stool	NS	0.40728640476920058	V1_V3V5	7.8173374613003083E-2	0.81750543381829455		Verrucomicrobiales (Order)
Stool	NS	0.17950694011321361	V1_V6V7	0.15	0.38465772881402921		Verrucomicrobiales (Order)
Stool	NS	0.18009713022933621	V1_V8V9	0.15821501014198791	0.54029139068800858		Verrucomicrobiales (Order)
Stool	OK_nc	9.2550074998464828E-3	V1_Control	0.30326797385620918	1.7353139062212159E-2	*	Verrucomicrobiales (Order)
Stool	NS	0.49785046639647718	V1_V2	8.5972850678733032E-2	0.73028893062843026		Acidaminococcales (Order)
Stool	NS	0.78871426638632502	V1_V3V5	-2.5541795665634661E-2	0.9559087967834955		Acidaminococcales (Order)
Stool	NS	0.75497045660181705	V1_V6V7	-3.3823529411764697E-2	0.79025749882691121		Acidaminococcales (Order)
Stool	NS	0.92421225454474254	V1_V8V9	1.2170385395537549E-2	0.92421225454474254		Acidaminococcales (Order)
Stool	OK_nc	5.9516472696235043E-2	V1_Control	0.22352941176470589	7.4395590870293793E-2	.	Acidaminococcales (Order)
Stool	NS	0.16761770594120251	V1_V2	0.2104072398190045	0.73028893062843026		Peptostreptococcales-Tissierellales (Order)
Stool	NS	0.5030879500132992	V1_V3V5	8.0495356037151689E-2	0.83847991668883204		Peptostreptococcales-Tissierellales (Order)
Stool	NS	6.1274385187858757E-2	V1_V6V7	0.25441176470588228	0.18519212531617199		Peptostreptococcales-Tissierellales (Order)
Stool	NS	8.1011774134746029E-2	V1_V8V9	0.25760649087221088	0.30379415300529761		Peptostreptococcales-Tissierellales (Order)
Stool	OK_nc	1.0479459929659591E-2	V1_Control	0.33856209150326788	1.746576654943266E-2	*	Peptostreptococcales-Tissierellales (Order)
Stool	NS	0.99387404090340203	V1_V2	2.2624434389140751E-3	0.99387404090340203		Monoglobales (Order)
Stool	NS	0.17307163882240351	V1_V3V5	0.1609907120743034	0.81750543381829455		Monoglobales (Order)
Stool	NS	7.407685012646878E-2	V1_V6V7	0.23970588235294121	0.18519212531617199		Monoglobales (Order)
Stool	NS	7.6928410979362968E-2	V1_V8V9	0.25760649087221088	0.30379415300529761		Monoglobales (Order)
Stool	OK_nc	4.4097411882042112E-5	V1_Control	0.53725490196078429	1.6536529455765789E-4	*	Monoglobales (Order)
Stool	NS	3.3437085941525918E-2	V1_V2	-0.3235294117647059	0.76905297665509609		Enterobacteriaceae (Family)
Stool	OK_nc	3.084144715874473E-3	V1_V3V5	-0.35448916408668729	7.0935328465112871E-2	.	Enterobacteriaceae (Family)
Stool	OK_nc	5.2158223695777436E-3	V1_V6V7	-0.37941176470588228	5.9981957250144061E-2	.	Enterobacteriaceae (Family)
Stool	OK_nc	1.2796546218176989E-2	V1_V8V9	-0.36713995943204869	9.8106854339356966E-2	.	Enterobacteriaceae (Family)
Stool	OK_nc	1.4909534249192821E-10	V1_Control	-0.84052287581699348	3.4291928773143499E-9	*	Enterobacteriaceae (Family)
Stool	NS	0.94647134642728792	V1_V2	-1.1312217194570149E-2	0.98949277126489188		Bacteroidaceae (Family)
Stool	NS	0.92014013848746434	V1_V3V5	-1.238390092879255E-2	0.96196469023689446		Bacteroidaceae (Family)
Stool	NS	6.284077021414472E-2	V1_V6V7	-0.25294117647058822	0.1893075058787535		Bacteroidaceae (Family)
Stool	NS	0.53939659831588926	V1_V8V9	-9.1277890466531508E-2	0.84988201766589588		Bacteroidaceae (Family)
Stool	OK_nc	1.387313472518213E-2	V1_Control	-0.32549019607843133	2.4544776821476079E-2	*	Bacteroidaceae (Family)
Stool	NS	0.6784066150442899	V1_V2	-6.1085972850678738E-2	0.86685289700103707		Enterococcaceae (Family)
Stool	NS	3.1969568702794243E-2	V1_V3V5	-0.23529411764705879	0.34416683210048032		Enterococcaceae (Family)
Stool	NS	1.754019422032025E-2	V1_V6V7	-0.29411764705882348	0.13447482235578859		Enterococcaceae (Family)
Stool	OK_nc	1.0908036426067989E-2	V1_V8V9	-0.33874239350912783	9.8106854339356966E-2	.	Enterococcaceae (Family)
Stool	OK_nc	8.4794369129307004E-8	V1_Control	-0.55947712418300655	6.5009016332468703E-7	*	Enterococcaceae (Family)
Stool	NS	0.43637882078944312	V1_V2	0.1199095022624435	0.76984624770413701		Streptococcaceae (Family)
Stool	NS	0.52404778081468062	V1_V3V5	7.6625386996904021E-2	0.72610711695308905		Streptococcaceae (Family)
Stool	NS	5.5224531349690582E-2	V1_V6V7	0.26029411764705879	0.1893075058787535		Streptococcaceae (Family)
Stool	NS	0.60746511180550344	V1_V8V9	7.7079107505070965E-2	0.84988201766589588		Streptococcaceae (Family)
Stool	OK_nc	1.722804427967647E-6	V1_Control	-0.60653594771241837	7.9249003686511741E-6	*	Streptococcaceae (Family)
Stool	NS	0.5096191632407735	V1_V2	-0.10180995475113119	0.76984624770413701		Lachnospiraceae (Family)
Stool	NS	0.686020082253462	V1_V3V5	4.8761609907120702E-2	0.86869997516949071		Lachnospiraceae (Family)
Stool	NS	0.62363082658146929	V1_V6V7	6.7647058823529393E-2	0.79686161174298853		Lachnospiraceae (Family)
Stool	NS	0.59790758797748478	V1_V8V9	7.9107505070993955E-2	0.84988201766589588		Lachnospiraceae (Family)
Stool	OK_nc	2.3071410037476231E-2	V1_Control	-0.29934640522875822	3.7903030775853809E-2	*	Lachnospiraceae (Family)
Stool	NS	0.35744178136158039	V1_V2	-0.14027149321266971	0.76984624770413701		Ruminococcaceae (Family)
Stool	NS	0.5087603647935508	V1_V3V5	7.9334365325077372E-2	0.72610711695308905		Ruminococcaceae (Family)
Stool	NS	0.26229852820849792	V1_V6V7	-0.15220588235294119	0.50273884573295435		Ruminococcaceae (Family)
Stool	NS	0.36512915544531638	V1_V8V9	0.1338742393509128	0.84988201766589588		Ruminococcaceae (Family)
Stool	OK_nc	3.9686713279341607E-8	V1_Control	0.72549019607843146	4.5639720271242861E-7	*	Ruminococcaceae (Family)
Stool	NS	0.47395691782954408	V1_V2	0.1097285067873304	0.76984624770413701		Veillonellaceae (Family)
Stool	NS	0.2263629666358902	V1_V3V5	0.14512383900928799	0.67144758433847074		Veillonellaceae (Family)
Stool	NS	0.38238658681163668	V1_V6V7	0.11911764705882361	0.55967668681073912		Veillonellaceae (Family)
Stool	NS	0.73025245993550425	V1_V8V9	5.1724137931034531E-2	0.88398981992192616		Veillonellaceae (Family)
Stool	OK_nc	2.5518647355195413E-4	V1_Control	-0.481045751633987	7.3366111146186798E-4	*	Veillonellaceae (Family)
Stool	NS	0.3587818551236962	V1_V2	0.14027149321266971	0.76984624770413701		Clostridiaceae (Family)
Stool	NS	0.30743488425589099	V1_V3V5	-0.12229102167182659	0.70710023378854936		Clostridiaceae (Family)
Stool	NS	7.2459993223632432E-2	V1_V6V7	0.24411764705882361	0.1893075058787535		Clostridiaceae (Family)
Stool	NS	0.80917832352986252	V1_V8V9	-3.6511156186612548E-2	0.89793884124535783		Clostridiaceae (Family)
Stool	OK_nc	1.3778504654380741E-3	V1_Control	-0.42091503267973862	3.4647866866343519E-3	*	Clostridiaceae (Family)
Stool	NS	0.49610381307465662	V1_V2	9.9547511312217174E-2	0.76984624770413701		Tannerellaceae (Family)
Stool	NS	0.90202028125478029	V1_V3V5	1.4318885448916409E-2	0.96196469023689446		Tannerellaceae (Family)
Stool	NS	0.41367407286011149	V1_V6V7	-0.1044117647058823	0.55967668681073912		Tannerellaceae (Family)
Stool	NS	0.81985720287619623	V1_V8V9	-3.2454361054766727E-2	0.89793884124535783		Tannerellaceae (Family)
Stool	OK_nc	4.4810064227226942E-2	V1_Control	0.26078431372549032	6.4414467326638733E-2	.	Tannerellaceae (Family)
Stool	NS	0.39918377026834989	V1_V2	-0.12895927601809951	0.76984624770413701		Erysipelatoclostridiaceae (Family)
Stool	NS	0.53668786905228316	V1_V3V5	7.4303405572755388E-2	0.72610711695308905		Erysipelatoclostridiaceae (Family)
Stool	NS	0.41276714063185982	V1_V6V7	0.111764705882353	0.55967668681073912		Erysipelatoclostridiaceae (Family)
Stool	NS	0.46897650745464542	V1_V8V9	0.10750507099391481	0.84988201766589588		Erysipelatoclostridiaceae (Family)
Stool	OK_nc	1.5064289941888491E-3	V1_Control	0.41960784313725491	3.4647866866343519E-3	*	Erysipelatoclostridiaceae (Family)
Stool	NS	0.9305863545517461	V1_V2	-1.357466063348417E-2	0.98949277126489188		Lactobacillaceae (Family)
Stool	NS	0.25585786282590539	V1_V3V5	-0.12151702786377711	0.67144758433847074		Lactobacillaceae (Family)
Stool	NS	0.39462688602929369	V1_V6V7	-0.1058823529411765	0.55967668681073912		Lactobacillaceae (Family)
Stool	NS	0.62817366523131435	V1_V8V9	-6.6937119675456347E-2	0.84988201766589588		Lactobacillaceae (Family)
Stool	OK_nc	8.3807086912277125E-7	V1_Control	-0.47843137254901957	4.8189074974559342E-6	*	Lactobacillaceae (Family)
Stool	NS	0.81697644136074477	V1_V2	2.7149321266968309E-2	0.93952290756485646		Akkermansiaceae (Family)
Stool	NS	0.40728640476920058	V1_V3V5	7.8173374613003083E-2	0.72610711695308905		Akkermansiaceae (Family)
Stool	NS	0.17950694011321361	V1_V6V7	0.15	0.41286596226039141		Akkermansiaceae (Family)
Stool	NS	0.18009713022933621	V1_V8V9	0.15821501014198791	0.69037233254578878		Akkermansiaceae (Family)
Stool	OK_nc	9.2550074998464828E-3	V1_Control	0.30326797385620918	1.935137931786083E-2	*	Akkermansiaceae (Family)
Stool	NS	0.2128090940863053	V1_V2	0.14819004524886881	0.76984624770413701		Rikenellaceae (Family)
Stool	NS	0.15498169656036709	V1_V3V5	0.13970588235294121	0.66344128215254672		Rikenellaceae (Family)
Stool	NS	0.956891316108884	V1_V6V7	5.8823529411764766E-3	0.956891316108884		Rikenellaceae (Family)
Stool	NS	0.98444332548997504	V1_V8V9	3.0425963488843739E-3	0.98444332548997504		Rikenellaceae (Family)
Stool	OK_nc	2.7818311286935929E-5	V1_Control	0.52222222222222214	1.0663685993325441E-4	*	Rikenellaceae (Family)
Stool	NS	0.49785046639647718	V1_V2	8.5972850678733032E-2	0.76984624770413701		Acidaminococcaceae (Family)
Stool	NS	0.78871426638632502	V1_V3V5	-2.5541795665634661E-2	0.90702140634427375		Acidaminococcaceae (Family)
Stool	NS	0.75497045660181705	V1_V6V7	-3.3823529411764697E-2	0.82617829422813438		Acidaminococcaceae (Family)
Stool	NS	0.92421225454474254	V1_V8V9	1.2170385395537549E-2	0.96622190247859441		Acidaminococcaceae (Family)
Stool	OK_nc	5.9516472696235043E-2	V1_Control	0.22352941176470589	8.052228658902387E-2	.	Acidaminococcaceae (Family)
Stool	NS	0.48244437199772572	V1_V2	9.0497737556561098E-2	0.76984624770413701		Pasteurellaceae (Family)
Stool	NS	7.6400324838075698E-2	V1_V3V5	0.19040247678018579	0.43930186781893532		Pasteurellaceae (Family)
Stool	NS	2.9892063344203881E-2	V1_V6V7	0.26470588235294118	0.1718793642291723		Pasteurellaceae (Family)
Stool	NS	0.42256888059851022	V1_V8V9	0.101419878296146	0.84988201766589588		Pasteurellaceae (Family)
Stool	OK_nc	3.2127346199207381E-2	V1_Control	0.26143790849673199	4.9261930838784662E-2	*	Pasteurellaceae (Family)
Stool	NS	0.16761770594120251	V1_V2	0.2104072398190045	0.76984624770413701		Peptostreptococcaceae (Family)
Stool	NS	0.5030879500132992	V1_V3V5	8.0495356037151689E-2	0.72610711695308905		Peptostreptococcaceae (Family)
Stool	NS	6.1274385187858757E-2	V1_V6V7	0.25441176470588228	0.1893075058787535		Peptostreptococcaceae (Family)
Stool	NS	8.1011774134746029E-2	V1_V8V9	0.25760649087221088	0.37265416101983168		Peptostreptococcaceae (Family)
Stool	OK_nc	1.0479459929659591E-2	V1_Control	0.33856209150326788	2.0085631531847552E-2	*	Peptostreptococcaceae (Family)
Stool	NS	0.99387404090340203	V1_V2	2.2624434389140751E-3	0.99387404090340203		Monoglobaceae (Family)
Stool	NS	0.17307163882240351	V1_V3V5	0.1609907120743034	0.66344128215254672		Monoglobaceae (Family)
Stool	NS	7.407685012646878E-2	V1_V6V7	0.23970588235294121	0.1893075058787535		Monoglobaceae (Family)
Stool	NS	7.6928410979362968E-2	V1_V8V9	0.25760649087221088	0.37265416101983168		Monoglobaceae (Family)
Stool	OK_nc	4.4097411882042112E-5	V1_Control	0.53725490196078429	1.4489149618385271E-4	*	Monoglobaceae (Family)
Stool	NS	0.30700381937949089	V1_V2	0.14705882352941169	0.76984624770413701		Erysipelotrichaceae (Family)
Stool	NS	4.4891325926149597E-2	V1_V3V5	0.23258513931888539	0.34416683210048032		Erysipelotrichaceae (Family)
Stool	OK_nc	6.3659511778724198E-4	V1_V6V7	0.45367647058823518	1.4641687709106571E-2	*	Erysipelotrichaceae (Family)
Stool	OK_nc	1.739279517003874E-3	V1_V8V9	0.45030425963488852	4.0003428891089092E-2	*	Erysipelotrichaceae (Family)
Stool	NS	0.18288176189764391	V1_Control	0.16797385620915031	0.23368225131365611		Erysipelotrichaceae (Family)

## Sheet: Supp_data8
Supplementary Data 8: Results of covariate aware analysis with MetadeconfoundR on diversity estimates.
Sample	feature	metaVariable	Ps (raw p)	Qs (fdr)	Ds (effect size)	status
Throat	diversity_shannon	age_y	2.65393641616873E-6	5.30787283233746E-6	-0.315366913830809	C: pp_fev_percent, staph_pos_throat
Throat	observed	age_y	4.01413107910102E-9	1.6056524316404E-8	-0.389403984657223	C: pp_fev_percent
Throat	diversity_shannon	levofloxacin_inhal	3.71218465188875E-10	7.42436930377751E-10	-0.413370595649531	C: staph_pos_throat
Throat	observed	levofloxacin_inhal	9.81358077962533E-11	3.92543231185013E-10	-0.42555740850806	OK_sd
Throat	dominance_dbp	levofloxacin_inhal	2.21805662357245E-6	2.95740883142993E-6	0.318410417863104	OK_sd
Throat	diversity_shannon	acetylcystein	3.02370613063797E-4	6.72953712510444E-4	-0.24579502339415	C: pp_fev_percent
Throat	diversity_shannon	insulin	7.60042091873547E-6	1.52008418374709E-5	-0.446498599439775	C: pp_fev_percent, staph_pos_sputum
Throat	observed	insulin	1.351262133184E-7	5.40504853273602E-7	-0.525770308123249	C: pp_fev_percent
Throat	observed	antidiabetic_oral	8.40204952898844E-6	3.36081981159537E-5	-0.713203463203463	C: age_y, ig_g_g_l, pp_fev_percent
Throat	observed	hb_a1c_percent	0.00146974628389593	0.00587898513558372	-0.299679348617378	C: age_y, levofloxacin_inhal, pp_fev_percent, staph_pos_throat
Throat	dominance_dbp	crp_mg_l	4.52120575327909E-5	9.04241150655819E-5	0.312882044003414	AD
Throat	evenness_pielou	interleukin6_pg_ml	0.00340393464936924	0.00340393464936924	-0.260040435982061	C: crp_mg_l, staph_pos_sputum
Throat	observed	ig_g_g_l	0.00110092897375911	0.00440371589503645	-0.22419664983996	C: hb_a1c_percent, pp_fev_percent
Throat	evenness_pielou	leukozyten_nl	0.00289991524985644	0.0115996609994257	-0.205039625490099	AD
Throat	diversity_shannon	pp_fev_percent	1.09060419138363E-7	2.18120838276726E-7	0.35730893094736	AD
Throat	observed	pp_fev_percent	3.98024712624318E-10	1.59209885049727E-9	0.415432163304889	AD
Throat	dominance_dbp	pp_fev_percent	0.00131878276107342	0.00175837701476456	-0.220745841572843	C: levofloxacin_inhal, crp_mg_l, total_reads
Throat	diversity_shannon	total_reads	0.0016526102261123	0.00220348030148307	0.214341817116167	C: staph_pos_sputum
Throat	observed	total_reads	3.38743838862002E-5	1.35497535544801E-4	0.280004920333021	C: hb_a1c_percent
Throat	dominance_dbp	total_reads	1.21665356674447E-4	2.43330713348894E-4	-0.260279611776282	AD
Sputum	observed	BMI	0.0199648298919169	0.0798593195676679	0.307522593761484	C: levofloxacin_inhal, dn_ase, treatmentdays_365prior_visit, chlorid_mmol_cl_l, delta_ETI_merged
Sputum	diversity_shannon	levofloxacin_inhal	0.00129414496742386	0.00258828993484772	-0.415870926763284	AD
Sputum	observed	levofloxacin_inhal	5.33199727981282E-5	2.13279891192512E-4	-0.508722800482025	OK_sd
Sputum	diversity_shannon	hypertonic_na_cl	0.00745717106903867	0.0149143421380773	-0.350836472112393	C: levofloxacin_inhal, chlorid_mmol_cl_l, pp_fev_percent, pp_fvc_percent, delta_ETI_merged
Sputum	evenness_pielou	hypertonic_na_cl	0.00640245140074692	0.0149143421380773	-0.357046931401339	C: chlorid_mmol_cl_l, crp_mg_l, cftr_prior_v1
Sputum	diversity_shannon	dn_ase	0.0232883653408743	0.0465767306817486	-0.300176546816506	C: levofloxacin_inhal, chlorid_mmol_cl_l, pp_fev_percent, delta_ETI_merged
Sputum	observed	dn_ase	0.00291741093667409	0.0116696437466963	-0.387291467212831	C: chlorid_mmol_cl_l
Sputum	evenness_pielou	ppi	0.022965028747387	0.091860114989548	0.300850780363512	C: crp_mg_l, interleukin6_pg_ml, pp_fev_percent, cftr_prior_v1
Sputum	observed	acetylcystein	0.00549864673362707	0.0219945869345083	-0.363127413788212	C: levofloxacin_inhal, treatmentdays_365prior_visit, chlorid_mmol_cl_l
Sputum	observed	treatmentdays_365prior_visit	0.00251805183621073	0.0100722073448429	-0.392656108149014	C: chlorid_mmol_cl_l, delta_ETI_merged
Sputum	diversity_shannon	chlorid_mmol_cl_l	0.0356446221268766	0.0712892442537533	-0.367009276789021	AD
Sputum	observed	chlorid_mmol_cl_l	0.0867197881412069	0.0952218236733586	-0.302817516634347	AD
Sputum	evenness_pielou	chlorid_mmol_cl_l	0.0331004001420794	0.0712892442537533	-0.371855938458822	OK_sd
Sputum	evenness_pielou	crp_mg_l	3.03258862786511E-4	0.00121303545114604	-0.499280701719052	C: chlorid_mmol_cl_l
Sputum	dominance_dbp	crp_mg_l	0.00435673404358958	0.0058089787247861	0.404440711950303	C: chlorid_mmol_cl_l
Sputum	evenness_pielou	interleukin6_pg_ml	2.25167969374421E-4	9.00671877497687E-4	-0.551556694443992	C: chlorid_mmol_cl_l
Sputum	dominance_dbp	interleukin6_pg_ml	0.00124793405931884	0.00166391207909179	0.492420718957213	AD
Sputum	diversity_shannon	pp_fev_percent	0.00442591122853335	0.0177036449141334	0.3780936585353	C: chlorid_mmol_cl_l
Sputum	evenness_pielou	pp_fev_percent	0.020816517060448	0.0277553560805974	0.311025327312292	C: chlorid_mmol_cl_l
Sputum	dominance_dbp	pp_fev_percent	0.00986579192066722	0.0197315838413344	-0.345118696330981	C: chlorid_mmol_cl_l
Sputum	diversity_shannon	pp_fvc_percent	0.0266559405640353	0.061638330873741	0.298872554656671	C: chlorid_mmol_cl_l, delta_ETI_merged
Sputum	evenness_pielou	pp_fvc_percent	0.0599962688232779	0.0799950250977039	0.255253902003373	C: chlorid_mmol_cl_l
Sputum	dominance_dbp	pp_fvc_percent	0.0308191654368705	0.061638330873741	-0.291512583489365	C: chlorid_mmol_cl_l
Sputum	diversity_shannon	cftr_prior_v1	0.00764678923661467	0.0139077478308118	-0.427027027027027	C: chlorid_mmol_cl_l, pp_fev_percent
Sputum	evenness_pielou	cftr_prior_v1	0.00553786430189546	0.0139077478308118	-0.443243243243243	C: crp_mg_l, interleukin6_pg_ml
Sputum	dominance_dbp	cftr_prior_v1	0.0104308108731088	0.0139077478308118	0.41081081081081	C: interleukin6_pg_ml
Sputum	diversity_shannon	delta_ETI_merged	0.00902908544672057	0.0180581708934411	0.342872885921614	AD
Sputum	observed	delta_ETI_merged	3.19805924084326E-5	1.2792236963373E-4	0.521409975865225	AD
Stool	diversity_shannon	azetronam_inhal	0.00246130079931009	0.00328173439908013	-0.21040281863119	C: id.y, cortison_oral, insulin, ssri
Stool	observed	azetronam_inhal	0.0014642518789973	0.00328173439908013	-0.220818609992445	C: id.y, insulin, ssri, treatmentdays_365prior_visit
Stool	dominance_dbp	azetronam_inhal	0.00238715960770694	0.00328173439908013	0.211029725968877	C: id.y, cortison_oral, insulin
Stool	diversity_shannon	cortison_oral	3.36039574398001E-4	4.48052765864001E-4	-0.248035167013127	OK_sd
Stool	evenness_pielou	cortison_oral	7.70390015282588E-5	1.54078003056517E-4	-0.272540692565894	OK_sd
Stool	dominance_dbp	cortison_oral	1.5671999711879E-5	6.26879988475161E-5	0.296649616841769	C: id.y
Stool	dominance_dbp	nasenspray	0.0087717165290557	0.0350868661162228	-0.435096153846153	C: id.y
Stool	dominance_dbp	ursodesoxychols_a_ure	0.00378543001363429	0.0151417200545371	-0.201386519500912	C: id.y, laxantien, insulin
Stool	diversity_shannon	laxantien	0.00266752240454477	0.00947661234903514	-0.241213665975279	C: id.y
Stool	evenness_pielou	laxantien	0.00473830617451757	0.00947661234903514	-0.227200958096142	C: id.y
Stool	dominance_dbp	laxantien	0.00711437893846258	0.00948583858461677	0.216774372884437	C: id.y
Stool	diversity_shannon	insulin	3.89725642850585E-7	7.79451285701171E-7	-0.522706209453197	C: id.y
Stool	observed	insulin	3.23975164601016E-6	4.31966886134688E-6	-0.479456286685202	C: id.y
Stool	evenness_pielou	insulin	3.59591239630038E-5	3.59591239630038E-5	-0.425702811244979	C: id.y
Stool	dominance_dbp	insulin	2.16085197989494E-7	7.79451285701171E-7	0.534136546184738	C: id.y
Stool	diversity_shannon	ssri	1.08662108039954E-4	2.17324216079908E-4	-0.505712866368604	C: id.y, insulin
Stool	observed	ssri	6.70531853919269E-6	2.68212741567707E-5	-0.588176850471932	C: id.y
Stool	evenness_pielou	ssri	0.0798323239718163	0.0798323239718163	-0.229011425732737	C: id.y, laba_inhal, cortison_inhal, cortison_oral, laxantien, insulin, pp_fev_percent, total_reads
Stool	dominance_dbp	ssri	0.0155525178987351	0.0207366905316468	0.316194734227521	C: id.y, azetronam_inhal, cortison_oral, laxantien, insulin, pp_fev_percent, basic_nutrition
Stool	diversity_shannon	treatmentdays_365prior_visit	9.46517073434523E-4	0.00189303414686904	-0.23032749677291	C: azetronam_inhal, insulin, ssri, pp_fev_percent, pp_fvc_percent
Stool	observed	treatmentdays_365prior_visit	1.88260953121107E-6	7.5304381248443E-6	-0.327246954747305	OK_sd
Stool	diversity_shannon	hb_a1c_percent	0.00696490117733168	0.0139298023546633	-0.263111990463022	C: id.y, azetronam_inhal, cortison_oral, insulin, ssri, pp_fev_percent
Stool	observed	hb_a1c_percent	0.00308122264037708	0.0123248905615083	-0.287525308499135	C: id.y, azetronam_inhal, laxantien, ssri, treatmentdays_365prior_visit, pp_fev_percent, total_reads
Stool	dominance_dbp	hb_a1c_percent	0.0237421848335663	0.0316562464447551	0.221649524148319	C: id.y, ursodesoxychols_a_ure, insulin
Stool	diversity_shannon	pp_fev_percent	3.20596445662443E-7	6.41192891324887E-7	0.350316289856671	C: id.y
Stool	observed	pp_fev_percent	8.17421818996617E-9	3.26968727598647E-8	0.391716372601845	C: id.y
Stool	dominance_dbp	pp_fev_percent	0.00414767964042354	0.00553023952056472	-0.200887125904605	C: id.y, insulin
Stool	diversity_shannon	pp_fvc_percent	9.19228722904764E-4	0.00183845744580952	0.232010968562427	C: id.y, pp_fev_percent
Stool	observed	pp_fvc_percent	2.93363192289268E-6	1.17345276915707E-5	0.322914474134283	C: pp_fev_percent
Stool	observed	total_reads	0.0020000986636796	0.00800039465471843	0.214106168764902	OK_sd

## Sheet: Supp_data9
Supplementary Data 9: Linear mixed effects model results for alpha diversity estimates CF sampling time-points compared to Control.
Sample	alpha_diversity	Months_after_ETI_start	Estimate	Std..Error	df	t.value	p	fdr	p_star	fdr_star
Throat rarefied	Shannon Index	Control (Intercept)	3.4456648619861401	0.14193869502290701	77.033615486670698	24.275725949361799	0	0	***	***
Throat rarefied	Shannon Index	Baseline	-0.11565808173389799	0.12667692021014801	146.695003762575	-0.91301621117745302	0.36273	0.54273000000000005	ns	ns
Throat rarefied	Shannon Index	3	-9.9466689465008307E-2	0.119564378662951	124.962347538383	-0.83190905667148496	0.40705000000000002	0.54273000000000005	ns	ns
Throat rarefied	Shannon Index	45089	-9.5537644048836204E-2	0.10900171844893	90.953306402264502	-0.87647832904209799	0.38307999999999998	0.54273000000000005	ns	ns
Throat rarefied	Shannon Index	15-18	-5.25537909994565E-2	0.115511495123198	110.283465082462	-0.45496589705990298	0.65003	0.74289000000000005	ns	ns
Throat rarefied	Shannon Index	21-24	-0.170982676096157	0.116492598483696	113.24271310572399	-1.46775570569907	0.14494000000000001	0.38651000000000002	ns	ns
Throat rarefied	Shannon Index	age_y	-6.7705990687317004E-3	3.9580047919729302E-3	65.984990081359101	-1.71060911357734	9.1850000000000001E-2	0.36741000000000001	.	ns
Throat rarefied	Shannon Index	sex	-2.3446752744567801E-2	0.104095886605482	67.481890814473502	-0.225241875631741	0.82247000000000003	0.82247000000000003	ns	ns
Throat rarefied	Observed ASVs	Control (Intercept)	102.30878498374599	7.6414866427875801	74.911833718777302	13.388596979399299	0	0	***	***
Throat rarefied	Observed ASVs	Baseline	-18.072336341065501	6.8887573558954296	149.038804722111	-2.6234537533244802	9.6100000000000005E-3	2.563E-2	**	*
Throat rarefied	Observed ASVs	3	-11.9073700830864	6.4862071447771203	126.29887029714	-1.8357986134739199	6.8739999999999996E-2	0.10843	.	ns
Throat rarefied	Observed ASVs	45089	-12.9930102497457	5.8843753276850999	90.186786888197901	-2.2080526013722301	2.9780000000000001E-2	5.9549999999999999E-2	*	.
Throat rarefied	Observed ASVs	15-18	-11.001646202821799	6.2543721511361303	110.485532849373	-1.7590328712408501	8.1339999999999996E-2	0.10843	.	ns
Throat rarefied	Observed ASVs	21-24	-18.425864571488201	6.3100328869559599	113.60342513081	-2.9200901012066001	4.2199999999999998E-3	1.6879999999999999E-2	**	*
Throat rarefied	Observed ASVs	age_y	-0.36036603410171802	0.212518878261092	63.112731354578202	-1.6956895173283699	9.4869999999999996E-2	0.10843	.	ns
Throat rarefied	Observed ASVs	sex	-3.8979315701972901	5.5914312240733599	64.644815394867905	-0.697125908195942	0.48821999999999999	0.48821999999999999	ns	ns
Throat rarefied	Evenness (Pielou)	Control (Intercept)	0.73965074354098603	2.0999251136303101E-2	69.583051927000099	35.222720026539001	0	0	***	***
Throat rarefied	Evenness (Pielou)	Baseline	1.19854373115405E-2	2.09353551969386E-2	190.54357547535301	0.57249744266546598	0.56766000000000005	0.90432999999999997	ns	ns
Throat rarefied	Evenness (Pielou)	3	5.1220076627659702E-3	1.9322919749324399E-2	163.96266381924201	0.26507420872277998	0.79129000000000005	0.90432999999999997	ns	ns
Throat rarefied	Evenness (Pielou)	45089	1.09457766170572E-2	1.67406029014819E-2	104.931104902185	0.65384602224142696	0.51463999999999999	0.90432999999999997	ns	ns
Throat rarefied	Evenness (Pielou)	15-18	1.6001288414611601E-2	1.8279346073757401E-2	135.01233313907201	0.87537531977600502	0.38291999999999998	0.90432999999999997	ns	ns
Throat rarefied	Evenness (Pielou)	21-24	5.7321625545981103E-3	1.85082443197702E-2	139.500135072928	0.30970860636819397	0.75724000000000002	0.90432999999999997	ns	ns
Throat rarefied	Evenness (Pielou)	age_y	-3.92004085785798E-4	5.6447991031268201E-4	48.039691970511001	-0.69445179292325199	0.49074000000000001	0.90432999999999997	ns	ns
Throat rarefied	Evenness (Pielou)	sex	-1.4092257990646201E-3	1.4905511965591299E-2	49.245724802933701	-9.4543937995404295E-2	0.92505999999999999	0.92505999999999999	ns	ns
Throat rarefied	Dominance Berger Parker	Control (Intercept)	0.17303279038462499	2.38119369264073E-2	78.879423066721401	7.2666407155116	0	0	***	***
Throat rarefied	Dominance Berger Parker	Baseline	-1.7767935455115898E-2	2.47176384375839E-2	212.289832313087	-0.71883628769725905	0.47303000000000001	0.75685000000000002	ns	ns
Throat rarefied	Dominance Berger Parker	3	6.8806075592326398E-3	2.2679617516764901E-2	191.015911296506	0.303382874695592	0.76193	0.94776000000000005	ns	ns
Throat rarefied	Dominance Berger Parker	45089	-3.0901567717391198E-3	1.9320587288861501E-2	127.56344309447	-0.15994114079133601	0.87317999999999996	0.94776000000000005	ns	ns
Throat rarefied	Dominance Berger Parker	15-18	-2.1084824123687999E-2	2.12913147265614E-2	159.59994987171899	-0.99030165090670297	0.32352999999999998	0.75685000000000002	ns	ns
Throat rarefied	Dominance Berger Parker	21-24	1.8852513594678402E-2	2.1583522263611699E-2	164.048954073011	0.87346788741995196	0.38368000000000002	0.75685000000000002	ns	ns
Throat rarefied	Dominance Berger Parker	age_y	6.00353564590432E-4	6.2853493517695804E-4	50.133200452216997	0.95516339823085294	0.34408	0.75685000000000002	ns	ns
Throat rarefied	Dominance Berger Parker	sex	1.09385453758346E-3	1.6613654419458002E-2	50.998340539506202	6.5840694043950099E-2	0.94776000000000005	0.94776000000000005	ns	ns
Stool rarefied	Shannon Index	Control (Intercept)	3.9805592026382999	9.3949940697867204E-2	84.196827829513097	42.368937894695897	0	0	***	***
Stool rarefied	Shannon Index	Baseline	-0.60642044099668402	8.0947348909439595E-2	162.86414428728301	-7.4915417140482399	0	0	***	***
Stool rarefied	Shannon Index	3	-0.65927501140450795	8.6081788574682003E-2	182.08269623833701	-7.6587048471064296	0	0	***	***
Stool rarefied	Shannon Index	45089	-0.58607566335574302	7.2829629851816693E-2	119.157589217961	-8.0472146370674302	0	0	***	***
Stool rarefied	Shannon Index	15-18	-0.59657992064936005	8.0171147360848793E-2	152.175256907056	-7.4413294593897303	0	0	***	***
Stool rarefied	Shannon Index	21-24	-0.54590311293255001	8.4944578195457796E-2	173.505889079333	-6.4265798303974604	0	0	***	***
Stool rarefied	Shannon Index	age_y	-6.8059504333099102E-4	2.47691168433762E-3	65.437219725496007	-0.27477566020404698	0.78434999999999999	0.78434999999999999	ns	ns
Stool rarefied	Shannon Index	sex	0.103477336510459	6.6332315978762504E-2	69.497729675554595	1.5599837723680501	0.12331	0.14091999999999999	ns	ns
Stool rarefied	Observed ASVs	Control (Intercept)	150.79548005652501	12.387131260972	68.331618584214098	12.173559549791401	0	0	***	***
Stool rarefied	Observed ASVs	Baseline	-76.957120222866095	9.3609882796267403	77.366168214724894	-8.2210465309902894	0	0	***	***
Stool rarefied	Observed ASVs	3	-78.410456207265895	9.5338943539149508	83.376152770200903	-8.2243890373158806	0	0	***	***
Stool rarefied	Observed ASVs	45089	-77.920655448990203	9.1171469151786901	69.890465869837797	-8.54660522353368	0	0	***	***
Stool rarefied	Observed ASVs	15-18	-66.561813498454796	9.3419522472010801	77.513103801134406	-7.12504321764193	0	0	***	***
Stool rarefied	Observed ASVs	21-24	-64.202406443691601	9.4909426630303901	82.788831917426506	-6.76459744022858	0	0	***	***
Stool rarefied	Observed ASVs	age_y	6.6390148308033595E-2	0.34078320373911702	66.551765577672896	0.19481637469098301	0.84613000000000005	0.84613000000000005	ns	ns
Stool rarefied	Observed ASVs	sex	18.3333148003052	9.0312771989287892	66.187175211744304	2.02998030029238	4.6379999999999998E-2	5.3010000000000002E-2	*	.
Stool rarefied	Evenness (Pielou)	Control (Intercept)	0.79133363507529098	1.1440678765699199E-2	97.373854708277193	69.168416601977896	0	0	***	***
Stool rarefied	Evenness (Pielou)	Baseline	-2.3000134450142401E-2	1.0624205165130801E-2	209.14064677340801	-2.1648804868367901	3.1530000000000002E-2	5.0450000000000002E-2	*	.
Stool rarefied	Evenness (Pielou)	3	-3.3848917302851299E-2	1.1415956604242E-2	220.498842067347	-2.96505308107719	3.3600000000000001E-3	6.7200000000000003E-3	**	**
Stool rarefied	Evenness (Pielou)	45089	-1.90682355331863E-2	9.2610072502757601E-3	161.36178971986999	-2.0589807369623401	4.1099999999999998E-2	5.4800000000000001E-2	*	.
Stool rarefied	Evenness (Pielou)	15-18	-4.17650379787163E-2	1.04268189565333E-2	192.31819150226099	-4.0055397674807303	9.0000000000000006E-5	3.5E-4	***	***
Stool rarefied	Evenness (Pielou)	21-24	-3.4571992589881501E-2	1.1189942211466899E-2	209.50503624004901	-3.0895595291326501	2.2799999999999999E-3	6.0699999999999999E-3	**	**
Stool rarefied	Evenness (Pielou)	age_y	8.7564774932616005E-5	2.9137332443237597E-4	65.313116010904295	0.30052433627272002	0.76473000000000002	0.76473000000000002	ns	ns
Stool rarefied	Evenness (Pielou)	sex	5.0888747647258297E-3	7.8610986964277995E-3	70.129330763269095	0.64734904893616096	0.51951999999999998	0.59374000000000005	ns	ns
Stool rarefied	Dominance Berger Parker	Control (Intercept)	9.1354447354049004E-2	1.4917564134685601E-2	99.686412663496597	6.1239520426552598	0	0	***	***
Stool rarefied	Dominance Berger Parker	Baseline	5.3729046191378603E-2	1.31990830715702E-2	189.75523835987599	4.0706650530222399	6.9999999999999994E-5	1.1E-4	***	***
Stool rarefied	Dominance Berger Parker	3	7.4958320667164097E-2	1.4098143858376599E-2	205.07726333180199	5.31689287754193	0	0	***	***
Stool rarefied	Dominance Berger Parker	45089	5.6553172177191899E-2	1.17330316574217E-2	145.13620636573	4.8199965557426099	0	1.0000000000000001E-5	***	***
Stool rarefied	Dominance Berger Parker	15-18	5.7989695453229101E-2	1.30336564519046E-2	177.316444641533	4.4492269431234703	2.0000000000000002E-5	3.0000000000000001E-5	***	***
Stool rarefied	Dominance Berger Parker	21-24	4.7817635088147403E-2	1.3880890500407901E-2	196.23281260757199	3.4448535622943002	6.9999999999999999E-4	9.3000000000000005E-4	***	***
Stool rarefied	Dominance Berger Parker	age_y	2.2532875445389799E-4	3.8886436240121298E-4	75.012790834811796	0.57945334219496702	0.56401999999999997	0.58543000000000001	ns	ns
Stool rarefied	Dominance Berger Parker	sex	-5.7187787390979399E-3	1.04415761785737E-2	79.821422499876803	-0.54769305335653595	0.58543000000000001	0.58543000000000001	ns	ns

## Sheet: Supp_data10
Supplementary Data 10: Effect sizes and significance of taxonomic alterations in comparison to Control across sample types.
Sample.Type	status	raw_p	comparison_p	effectSize	corr_p	fdr	taxa
Stool	OK_nc	1.00328e-05	Control_V2	-0.623932	4.77813e-05	*	Escherichia_Shigella (Genus)
Stool	OK_nc	5.35266e-12	Control_V3V5	-0.750292	1.36493e-10	*	Escherichia_Shigella (Genus)
Stool	OK_nc	1.65804e-09	Control_V6V7	-0.755556	2.81868e-08	*	Escherichia_Shigella (Genus)
Stool	OK_nc	2.82296e-08	Control_V8V9	-0.754074	7.19854e-07	*	Escherichia_Shigella (Genus)
Stool	OK_nc	1.41915e-10	Control_V1	-0.840523	4.49752e-09	*	Escherichia_Shigella (Genus)
Stool	NS	0.103276	Control_V2	-0.234188	0.169906		Bacteroides (Genus)
Stool	OK_nc	0.0118067	Control_V3V5	-0.274854	0.0215051	*	Bacteroides (Genus)
Stool	NS	0.754614	Control_V6V7	-0.04	0.785414		Bacteroides (Genus)
Stool	NS	0.281893	Control_V8V9	-0.148148	0.368629		Bacteroides (Genus)
Stool	OK_nc	0.0553718	Control_V1	-0.253595	0.0941321	.	Bacteroides (Genus)
Stool	OK_nc	4.25049e-06	Control_V2	-0.47094	2.70969e-05	*	Enterococcus (Genus)
Stool	OK_nc	3.12529e-05	Control_V3V5	-0.352632	9.37586e-05	*	Enterococcus (Genus)
Stool	OK_nc	0.000693551	Control_V6V7	-0.285	0.00221069	*	Enterococcus (Genus)
Stool	OK_nc	0.0120698	Control_V8V9	-0.194815	0.0341978	*	Enterococcus (Genus)
Stool	OK_nc	9.08737e-08	Control_V1	-0.55817	9.26912e-07	*	Enterococcus (Genus)
Stool	OK_nc	1.11069e-05	Control_V2	-0.605128	4.77813e-05	*	Streptococcus (Genus)
Stool	OK_nc	1.40751e-06	Control_V3V5	-0.526316	6.52572e-06	*	Streptococcus (Genus)
Stool	OK_nc	1.15587e-07	Control_V6V7	-0.669444	8.42134e-07	*	Streptococcus (Genus)
Stool	OK_nc	0.000320271	Control_V8V9	-0.482963	0.00163338	*	Streptococcus (Genus)
Stool	OK_nc	6.81016e-06	Control_V1	-0.573856	2.55976e-05	*	Streptococcus (Genus)
Stool	NS	0.200931	Control_V2	0.184615	0.262756		Blautia (Genus)
Stool	NS	0.279867	Control_V3V5	0.118129	0.317182		Blautia (Genus)
Stool	NS	0.658198	Control_V6V7	0.0566667	0.733306		Blautia (Genus)
Stool	NS	0.587128	Control_V8V9	0.0755556	0.623824		Blautia (Genus)
Stool	OK_nc	0.0550448	Control_V1	0.253595	0.0941321	.	Blautia (Genus)
Stool	OK_nc	1.10546e-08	Control_V2	0.818803	2.81893e-07	*	Faecalibacterium (Genus)
Stool	OK_nc	1.73625e-09	Control_V3V5	0.655556	2.95163e-08	*	Faecalibacterium (Genus)
Stool	OK_nc	2.69406e-09	Control_V6V7	0.75	3.43492e-08	*	Faecalibacterium (Genus)
Stool	OK_nc	0.00166443	Control_V8V9	0.431111	0.00652969	*	Faecalibacterium (Genus)
Stool	OK_nc	6.40893e-06	Control_V1	0.596078	2.55976e-05	*	Faecalibacterium (Genus)
Stool	OK_nc	1.3568e-09	Control_V2	-0.828205	6.91967e-08	*	Veillonella (Genus)
Stool	OK_nc	2.43259e-12	Control_V3V5	-0.748246	1.24062e-10	*	Veillonella (Genus)
Stool	OK_nc	4.15362e-09	Control_V6V7	-0.711111	4.2367e-08	*	Veillonella (Genus)
Stool	OK_nc	3.23813e-09	Control_V8V9	-0.776296	1.65144e-07	*	Veillonella (Genus)
Stool	OK_nc	1.76373e-10	Control_V1	-0.811765	4.49752e-09	*	Veillonella (Genus)
Stool	NS	0.269508	Control_V2	0.158974	0.32726		Fusicatenibacter (Genus)
Stool	OK_nc	0.0356532	Control_V3V5	0.22924	0.0590437	.	Fusicatenibacter (Genus)
Stool	NS	0.348326	Control_V6V7	0.118889	0.433284		Fusicatenibacter (Genus)
Stool	NS	0.526789	Control_V8V9	0.0874074	0.571622		Fusicatenibacter (Genus)
Stool	NS	0.964453	Control_V1	0.00653595	0.964453		Fusicatenibacter (Genus)
Stool	OK_nc	0.038672	Control_V2	-0.296581	0.0758566	.	Clostridium sensu stricto 1 (Genus)
Stool	NS	0.78598	Control_V3V5	-0.0298246	0.78598		Clostridium sensu stricto 1 (Genus)
Stool	OK_nc	0.00742994	Control_V6V7	-0.337778	0.0180441	*	Clostridium sensu stricto 1 (Genus)
Stool	NS	0.266891	Control_V8V9	-0.152593	0.358195		Clostridium sensu stricto 1 (Genus)
Stool	NS	0.483649	Control_V1	-0.0928105	0.53622		Clostridium sensu stricto 1 (Genus)
Stool	OK_nc	0.000253432	Control_V2	0.524786	0.000807813	*	Agathobacter (Genus)
Stool	OK_nc	3.4729e-05	Control_V3V5	0.451462	9.83987e-05	*	Agathobacter (Genus)
Stool	OK_nc	2.71075e-05	Control_V6V7	0.53	0.00012568	*	Agathobacter (Genus)
Stool	OK_nc	0.0170794	Control_V8V9	0.327407	0.0395931	*	Agathobacter (Genus)
Stool	OK_nc	0.000462881	Control_V1	0.462745	0.0013115	*	Agathobacter (Genus)
Stool	OK_nc	0.000799914	Control_V2	-0.442735	0.00226642	*	[Ruminococcus] gnavus group (Genus)
Stool	OK_nc	8.3988e-07	Control_V3V5	-0.519298	4.75932e-06	*	[Ruminococcus] gnavus group (Genus)
Stool	OK_nc	0.000245775	Control_V6V7	-0.43	0.000835636	*	[Ruminococcus] gnavus group (Genus)
Stool	OK_nc	0.016128	Control_V8V9	-0.302222	0.0391681	*	[Ruminococcus] gnavus group (Genus)
Stool	OK_nc	1.14052e-06	Control_V1	-0.60915	6.46295e-06	*	[Ruminococcus] gnavus group (Genus)
Stool	OK_nc	0.000394625	Control_V2	0.484615	0.00118387	*	Ruminococcus (Genus)
Stool	OK_nc	1.46193e-05	Control_V3V5	0.428947	4.97056e-05	*	Ruminococcus (Genus)
Stool	OK_nc	5.76968e-06	Control_V6V7	0.531667	3.26948e-05	*	Ruminococcus (Genus)
Stool	OK_nc	0.000101358	Control_V8V9	0.502963	0.000574361	*	Ruminococcus (Genus)
Stool	OK_nc	3.42139e-05	Control_V1	0.513725	0.000109057	*	Ruminococcus (Genus)
Stool	OK_nc	0.00612394	Control_V2	0.393162	0.0148724	*	Anaerostipes (Genus)
Stool	NS	0.115465	Control_V3V5	0.17193	0.159154		Anaerostipes (Genus)
Stool	NS	0.117999	Control_V6V7	0.197778	0.162647		Anaerostipes (Genus)
Stool	NS	0.432966	Control_V8V9	0.108148	0.490695		Anaerostipes (Genus)
Stool	NS	0.0838643	Control_V1	0.228758	0.133659		Anaerostipes (Genus)
Stool	OK_nc	0.0522746	Control_V2	0.276923	0.0987408	.	Collinsella (Genus)
Stool	OK_nc	0.0653116	Control_V3V5	0.19883	0.0925248	.	Collinsella (Genus)
Stool	NS	0.313215	Control_V6V7	0.127222	0.409588		Collinsella (Genus)
Stool	NS	0.337898	Control_V8V9	0.131111	0.420312		Collinsella (Genus)
Stool	NS	0.313242	Control_V1	0.133333	0.37152		Collinsella (Genus)
Stool	OK_nc	1.67692e-06	Control_V2	0.68547	1.28553e-05	*	Subdoligranulum (Genus)
Stool	OK_nc	8.92567e-09	Control_V3V5	0.625146	9.10418e-08	*	Subdoligranulum (Genus)
Stool	OK_nc	4.52885e-10	Control_V6V7	0.782222	2.30971e-08	*	Subdoligranulum (Genus)
Stool	OK_nc	3.0436e-06	Control_V8V9	0.638519	3.8806e-05	*	Subdoligranulum (Genus)
Stool	OK_nc	6.66832e-08	Control_V1	0.711111	8.50211e-07	*	Subdoligranulum (Genus)
Stool	OK_nc	6.87593e-05	Control_V2	-0.57094	0.000233782	*	Lachnoclostridium (Genus)
Stool	OK_nc	5.27982e-06	Control_V3V5	-0.496784	2.24392e-05	*	Lachnoclostridium (Genus)
Stool	OK_nc	0.0172258	Control_V6V7	-0.301111	0.0337891	*	Lachnoclostridium (Genus)
Stool	OK_nc	0.00112972	Control_V8V9	-0.446667	0.00506808	*	Lachnoclostridium (Genus)
Stool	OK_nc	0.00025832	Control_V1	-0.483007	0.000774961	*	Lachnoclostridium (Genus)
Stool	OK_nc	1.12427e-05	Control_V2	-0.516239	4.77813e-05	*	Erysipelatoclostridium (Genus)
Stool	OK_nc	1.38098e-05	Control_V3V5	-0.411404	4.97056e-05	*	Erysipelatoclostridium (Genus)
Stool	OK_nc	0.00013042	Control_V6V7	-0.394444	0.000511649	*	Erysipelatoclostridium (Genus)
Stool	OK_nc	0.0213891	Control_V8V9	-0.231852	0.0442801	*	Erysipelatoclostridium (Genus)
Stool	OK_nc	1.96511e-07	Control_V1	-0.6	1.67034e-06	*	Erysipelatoclostridium (Genus)
Stool	NS	0.124416	Control_V2	0.218803	0.192242		Parabacteroides (Genus)
Stool	OK_nc	0.00397405	Control_V3V5	0.306725	0.00779526	*	Parabacteroides (Genus)
Stool	OK_nc	0.000163897	Control_V6V7	0.466667	0.000597052	*	Parabacteroides (Genus)
Stool	OK_nc	0.0129338	Control_V8V9	0.336296	0.0347171	*	Parabacteroides (Genus)
Stool	OK_nc	0.0183083	Control_V1	0.306536	0.0389051	*	Parabacteroides (Genus)
Stool	OK_nc	1.48602e-06	Control_V2	0.68547	1.28553e-05	*	Erysipelotrichaceae UCG-003 (Genus)
Stool	OK_nc	1.29632e-06	Control_V3V5	0.522222	6.52572e-06	*	Erysipelotrichaceae UCG-003 (Genus)
Stool	OK_nc	0.000857557	Control_V6V7	0.418889	0.00242974	*	Erysipelotrichaceae UCG-003 (Genus)
Stool	OK_nc	0.00221365	Control_V8V9	0.419259	0.00806402	*	Erysipelotrichaceae UCG-003 (Genus)
Stool	OK_nc	1.43709e-06	Control_V1	0.630065	7.32918e-06	*	Erysipelotrichaceae UCG-003 (Genus)
Stool	NS	0.296315	Control_V2	-0.150427	0.343456		Dorea (Genus)
Stool	OK_nc	0.0019193	Control_V3V5	-0.338596	0.00391537	*	Dorea (Genus)
Stool	OK_nc	0.00804512	Control_V6V7	-0.335	0.0185188	*	Dorea (Genus)
Stool	OK_nc	2.58815e-05	Control_V8V9	-0.577037	0.000219993	*	Dorea (Genus)
Stool	NS	0.179699	Control_V1	-0.177778	0.234991		Dorea (Genus)
Stool	NS	0.17496	Control_V2	0.194017	0.234815		Intestinibacter (Genus)
Stool	NS	0.149482	Control_V3V5	0.15614	0.190589		Intestinibacter (Genus)
Stool	NS	0.278557	Control_V6V7	0.136111	0.373853		Intestinibacter (Genus)
Stool	OK_nc	0.0309386	Control_V8V9	0.292593	0.0584395	.	Intestinibacter (Genus)
Stool	NS	0.108797	Control_V1	0.211111	0.158533		Intestinibacter (Genus)
Stool	NS	0.778144	Control_V2	0.0393162	0.809904		Dialister (Genus)
Stool	NS	0.139246	Control_V3V5	0.149123	0.182091		Dialister (Genus)
Stool	OK_nc	0.00906587	Control_V6V7	0.296667	0.019265	*	Dialister (Genus)
Stool	OK_nc	0.0548901	Control_V8V9	0.242963	0.0903031	.	Dialister (Genus)
Stool	NS	0.856666	Control_V1	-0.0235294	0.8738		Dialister (Genus)
Stool	OK_nc	1.76446e-06	Control_V2	0.682051	1.28553e-05	*	Lachnospiraceae ND3007 group (Genus)
Stool	OK_nc	1.11457e-08	Control_V3V5	0.62076	9.47383e-08	*	Lachnospiraceae ND3007 group (Genus)
Stool	OK_nc	1.63281e-09	Control_V6V7	0.755	2.81868e-08	*	Lachnospiraceae ND3007 group (Genus)
Stool	OK_nc	2.77009e-06	Control_V8V9	0.640741	3.8806e-05	*	Lachnospiraceae ND3007 group (Genus)
Stool	OK_nc	5.95919e-07	Control_V1	0.657516	3.79898e-06	*	Lachnospiraceae ND3007 group (Genus)
Stool	NS	0.208166	Control_V2	0.17094	0.265411		Haemophilus (Genus)
Stool	NS	0.511428	Control_V3V5	0.0678363	0.528376		Haemophilus (Genus)
Stool	NS	0.675792	Control_V6V7	-0.0511111	0.733306		Haemophilus (Genus)
Stool	NS	0.140613	Control_V8V9	0.191111	0.21092		Haemophilus (Genus)
Stool	OK_nc	0.0218367	Control_V1	0.279739	0.0445469	*	Haemophilus (Genus)
Stool	NS	0.128162	Control_V2	0.208547	0.192242		Parasutterella (Genus)
Stool	NS	0.197868	Control_V3V5	0.132749	0.240268		Parasutterella (Genus)
Stool	OK_nc	0.0420298	Control_V6V7	0.244444	0.0714507	.	Parasutterella (Genus)
Stool	NS	0.906873	Control_V8V9	0.0162963	0.925011		Parasutterella (Genus)
Stool	NS	0.231382	Control_V1	0.151634	0.295013		Parasutterella (Genus)
Stool	OK_nc	0.00367656	Control_V2	-0.386325	0.00937522	*	[Clostridium] innocuum group (Genus)
Stool	OK_nc	0.042037	Control_V3V5	-0.204094	0.0612539	.	[Clostridium] innocuum group (Genus)
Stool	OK_nc	0.0331163	Control_V6V7	-0.247222	0.060319	.	[Clostridium] innocuum group (Genus)
Stool	NS	0.382519	Control_V8V9	-0.106667	0.453685		[Clostridium] innocuum group (Genus)
Stool	OK_nc	0.00339562	Control_V1	-0.361438	0.0082465	*	[Clostridium] innocuum group (Genus)
Stool	NS	0.124998	Control_V2	0.220513	0.192242		Romboutsia (Genus)
Stool	OK_nc	0.000245037	Control_V3V5	0.39883	0.000624845	*	Romboutsia (Genus)
Stool	OK_nc	0.0624276	Control_V6V7	0.235556	0.0936414	.	Romboutsia (Genus)
Stool	NS	0.3015	Control_V8V9	0.142222	0.384413		Romboutsia (Genus)
Stool	OK_nc	7.02678e-06	Control_V1	0.592157	2.55976e-05	*	Romboutsia (Genus)
Stool	NS	0.100714	Control_V2	0.235043	0.169906		Roseburia (Genus)
Stool	OK_nc	0.00626817	Control_V3V5	0.295322	0.0118399	*	Roseburia (Genus)
Stool	OK_nc	0.0449261	Control_V6V7	0.251111	0.0716009	.	Roseburia (Genus)
Stool	NS	0.13369	Control_V8V9	0.205185	0.206612		Roseburia (Genus)
Stool	OK_nc	0.00866809	Control_V1	0.345752	0.0192205	*	Roseburia (Genus)
Stool	OK_nc	0.00139945	Control_V2	-0.418803	0.00375641	*	Eggerthella (Genus)
Stool	OK_nc	0.0015035	Control_V3V5	-0.321053	0.00319494	*	Eggerthella (Genus)
Stool	OK_nc	0.0465615	Control_V6V7	-0.221111	0.0719587	.	Eggerthella (Genus)
Stool	OK_nc	0.0065476	Control_V8V9	-0.336296	0.0196428	*	Eggerthella (Genus)
Stool	OK_nc	0.00168587	Control_V1	-0.380392	0.00452523	*	Eggerthella (Genus)
Stool	OK_nc	1.26052e-05	Control_V2	0.624786	4.94512e-05	*	Monoglobus (Genus)
Stool	OK_nc	9.12531e-06	Control_V3V5	0.482456	3.57993e-05	*	Monoglobus (Genus)
Stool	OK_nc	0.00212862	Control_V6V7	0.387778	0.00542797	*	Monoglobus (Genus)
Stool	OK_nc	0.00618572	Control_V8V9	0.375556	0.0196428	*	Monoglobus (Genus)
Stool	OK_nc	3.13075e-06	Control_V1	0.613072	1.45153e-05	*	Monoglobus (Genus)
Stool	OK_nc	5.37868e-05	Control_V2	-0.413675	0.000195938	*	Lachnospiraceae NK4A136 group (Genus)
Stool	OK_nc	2.87473e-05	Control_V3V5	-0.365497	9.16319e-05	*	Lachnospiraceae NK4A136 group (Genus)
Stool	OK_nc	0.0083516	Control_V6V7	-0.215556	0.0185188	*	Lachnospiraceae NK4A136 group (Genus)
Stool	OK_nc	0.00589541	Control_V8V9	-0.241481	0.0196428	*	Lachnospiraceae NK4A136 group (Genus)
Stool	OK_nc	0.00564243	Control_V1	-0.236601	0.0130802	*	Lachnospiraceae NK4A136 group (Genus)
Stool	NS	0.0876952	Control_V2	0.231624	0.159731		Lachnospira (Genus)
Stool	OK_nc	0.0374338	Control_V3V5	0.211404	0.0596601	.	Lachnospira (Genus)
Stool	OK_nc	6.73183e-05	Control_V6V7	0.449444	0.000286103	*	Lachnospira (Genus)
Stool	OK_nc	0.00119249	Control_V8V9	0.40963	0.00506808	*	Lachnospira (Genus)
Stool	OK_nc	0.0514534	Control_V1	0.24183	0.0941321	.	Lachnospira (Genus)
Stool	NS	0.871507	Control_V2	0.0239316	0.871507		[Ruminococcus] torques group (Genus)
Stool	OK_nc	0.0392371	Control_V3V5	0.223392	0.0606392	.	[Ruminococcus] torques group (Genus)
Stool	NS	0.877142	Control_V6V7	0.02	0.877142		[Ruminococcus] torques group (Genus)
Stool	NS	0.504877	Control_V8V9	-0.0918519	0.559755		[Ruminococcus] torques group (Genus)
Stool	NS	0.0673587	Control_V1	-0.24183	0.110816		[Ruminococcus] torques group (Genus)
Stool	NS	0.480179	Control_V2	-0.0957265	0.532373		Turicibacter (Genus)
Stool	NS	0.218838	Control_V3V5	-0.128947	0.259552		Turicibacter (Genus)
Stool	OK_nc	0.0120156	Control_V6V7	-0.307222	0.0245117	*	Turicibacter (Genus)
Stool	OK_nc	0.0205331	Control_V8V9	-0.306667	0.0442801	*	Turicibacter (Genus)
Stool	NS	0.333985	Control_V1	0.118954	0.387119		Turicibacter (Genus)
Stool	NS	0.407268	Control_V2	0.116239	0.46157		[Ruminococcus] gauvreauii group (Genus)
Stool	NS	0.356415	Control_V3V5	0.0967836	0.378691		[Ruminococcus] gauvreauii group (Genus)
Stool	OK_nc	0.0446072	Control_V6V7	0.243333	0.0716009	.	[Ruminococcus] gauvreauii group (Genus)
Stool	OK_nc	0.0518773	Control_V8V9	0.259259	0.0881914	.	[Ruminococcus] gauvreauii group (Genus)
Stool	NS	0.163417	Control_V1	0.178431	0.225251		[Ruminococcus] gauvreauii group (Genus)
Stool	OK_nc	7.06342e-06	Control_V2	0.628205	4.0026e-05	*	Odoribacter (Genus)
Stool	OK_nc	7.2296e-08	Control_V3V5	0.550585	5.26728e-07	*	Odoribacter (Genus)
Stool	OK_nc	2.99557e-06	Control_V6V7	0.567222	1.90968e-05	*	Odoribacter (Genus)
Stool	OK_nc	3.59767e-05	Control_V8V9	0.551852	0.000262116	*	Odoribacter (Genus)
Stool	OK_nc	4.37083e-07	Control_V1	0.645098	3.18446e-06	*	Odoribacter (Genus)
Stool	NS	0.132661	Control_V2	0.205128	0.193305		Terrisporobacter (Genus)
Stool	OK_nc	0.0412597	Control_V3V5	0.210234	0.0612539	.	Terrisporobacter (Genus)
Stool	NS	0.361806	Control_V6V7	-0.113333	0.439336		Terrisporobacter (Genus)
Stool	NS	0.250731	Control_V8V9	0.151852	0.345602		Terrisporobacter (Genus)
Stool	NS	0.107118	Control_V1	0.203922	0.158533		Terrisporobacter (Genus)
Stool	OK_nc	0.0107551	Control_V2	0.34359	0.0249158	*	CAG-56 (Genus)
Stool	OK_nc	0.000928401	Control_V3V5	0.327778	0.0021522	*	CAG-56 (Genus)
Stool	OK_nc	0.00132292	Control_V6V7	0.380556	0.00355099	*	CAG-56 (Genus)
Stool	OK_nc	0.046883	Control_V8V9	0.26	0.0824495	.	CAG-56 (Genus)
Stool	OK_nc	0.00181187	Control_V1	0.386928	0.00462026	*	CAG-56 (Genus)
Stool	NS	0.567602	Control_V2	-0.0820513	0.603077		Butyricicoccus (Genus)
Stool	OK_nc	0.0252112	Control_V3V5	-0.243275	0.0443369	*	Butyricicoccus (Genus)
Stool	OK_nc	0.0347148	Control_V6V7	-0.265556	0.0610502	.	Butyricicoccus (Genus)
Stool	OK_nc	0.0368653	Control_V8V9	-0.285926	0.0671476	.	Butyricicoccus (Genus)
Stool	NS	0.355178	Control_V1	-0.121569	0.402535		Butyricicoccus (Genus)
Stool	OK_nc	0.0143748	Control_V2	-0.3	0.0305465	*	Lactococcus (Genus)
Stool	OK_nc	0.0358893	Control_V3V5	-0.2	0.0590437	.	Lactococcus (Genus)
Stool	NS	0.727164	Control_V6V7	-0.035	0.772612		Lactococcus (Genus)
Stool	NS	0.189313	Control_V8V9	-0.14963	0.275856		Lactococcus (Genus)
Stool	NS	0.672537	Control_V1	0.0424837	0.71457		Lactococcus (Genus)
Stool	OK_nc	2.37703e-07	Control_V2	-0.5	3.03072e-06	*	Megasphaera (Genus)
Stool	OK_nc	3.92182e-07	Control_V3V5	-0.434211	2.50016e-06	*	Megasphaera (Genus)
Stool	OK_nc	1.02279e-07	Control_V6V7	-0.5	8.42134e-07	*	Megasphaera (Genus)
Stool	OK_nc	4.95594e-06	Control_V8V9	-0.4	5.05505e-05	*	Megasphaera (Genus)
Stool	OK_nc	7.54661e-06	Control_V1	-0.382353	2.56585e-05	*	Megasphaera (Genus)
Stool	OK_nc	0.0247519	Control_V2	0.302564	0.0504938	.	Bilophila (Genus)
Stool	OK_nc	0.00143725	Control_V3V5	0.316959	0.00318694	*	Bilophila (Genus)
Stool	OK_nc	0.0230821	Control_V6V7	0.266667	0.0435996	*	Bilophila (Genus)
Stool	OK_nc	0.0157868	Control_V8V9	0.312593	0.0391681	*	Bilophila (Genus)
Stool	OK_nc	0.0537916	Control_V1	0.24183	0.0941321	.	Bilophila (Genus)
Stool	OK_nc	0.0112366	Control_V2	0.329915	0.0249158	*	Incertae Sedis (Genus)
Stool	OK_nc	9.80889e-05	Control_V3V5	0.363743	0.000263291	*	Incertae Sedis (Genus)
Stool	OK_nc	0.000849958	Control_V6V7	0.373333	0.00242974	*	Incertae Sedis (Genus)
Stool	OK_nc	0.0217059	Control_V8V9	0.29037	0.0442801	*	Incertae Sedis (Genus)
Stool	OK_nc	0.0291711	Control_V1	0.269281	0.0572202	.	Incertae Sedis (Genus)
Stool	OK_nc	2.5648e-08	Control_V2	0.778632	4.36015e-07	*	Lachnospiraceae FCS020 group (Genus)
Stool	OK_nc	4.3444e-09	Control_V3V5	0.607895	5.53911e-08	*	Lachnospiraceae FCS020 group (Genus)
Stool	OK_nc	1.45737e-05	Control_V6V7	0.536667	7.43259e-05	*	Lachnospiraceae FCS020 group (Genus)
Stool	OK_nc	4.42105e-05	Control_V8V9	0.554074	0.000281842	*	Lachnospiraceae FCS020 group (Genus)
Stool	OK_nc	2.69499e-08	Control_V1	0.71634	4.58148e-07	*	Lachnospiraceae FCS020 group (Genus)
Stool	NS	0.162892	Control_V2	-0.150427	0.224526		Colidextribacter (Genus)
Stool	OK_nc	0.000657164	Control_V3V5	-0.324561	0.00159597	*	Colidextribacter (Genus)
Stool	NS	0.672876	Control_V6V7	-0.0377778	0.733306		Colidextribacter (Genus)
Stool	OK_nc	0.0303804	Control_V8V9	-0.235556	0.0584395	.	Colidextribacter (Genus)
Stool	NS	0.171462	Control_V1	-0.138562	0.230121		Colidextribacter (Genus)
Stool	OK_nc	1.00328e-05	Control_V2	-0.623932	4.14171e-05	*	Enterobacteriaceae (Family)
Stool	OK_nc	5.35266e-12	Control_V3V5	-0.750292	6.15556e-11	*	Enterobacteriaceae (Family)
Stool	OK_nc	1.65804e-09	Control_V6V7	-0.755556	1.90675e-08	*	Enterobacteriaceae (Family)
Stool	OK_nc	4.53374e-08	Control_V8V9	-0.750192	5.2138e-07	*	Enterobacteriaceae (Family)
Stool	OK_nc	1.41915e-10	Control_V1	-0.840523	1.63202e-09	*	Enterobacteriaceae (Family)
Stool	NS	0.103276	Control_V2	-0.234188	0.158357		Bacteroidaceae (Family)
Stool	OK_nc	0.0118067	Control_V3V5	-0.274854	0.0193967	*	Bacteroidaceae (Family)
Stool	NS	0.754614	Control_V6V7	-0.04	0.788914		Bacteroidaceae (Family)
Stool	NS	0.227457	Control_V8V9	-0.167816	0.290639		Bacteroidaceae (Family)
Stool	OK_nc	0.0553718	Control_V1	-0.253595	0.0849035	.	Bacteroidaceae (Family)
Stool	OK_nc	4.25049e-06	Control_V2	-0.47094	4.06147e-05	*	Enterococcaceae (Family)
Stool	OK_nc	3.12529e-05	Control_V3V5	-0.352632	0.000102688	*	Enterococcaceae (Family)
Stool	OK_nc	0.000693551	Control_V6V7	-0.285	0.00265861	*	Enterococcaceae (Family)
Stool	OK_nc	0.0100404	Control_V8V9	-0.203065	0.0246551	*	Enterococcaceae (Family)
Stool	OK_nc	9.08737e-08	Control_V1	-0.55817	6.96699e-07	*	Enterococcaceae (Family)
Stool	OK_nc	6.61816e-06	Control_V2	-0.618803	4.06147e-05	*	Streptococcaceae (Family)
Stool	OK_nc	4.43768e-07	Control_V3V5	-0.550877	2.55167e-06	*	Streptococcaceae (Family)
Stool	OK_nc	4.372e-08	Control_V6V7	-0.656667	3.35187e-07	*	Streptococcaceae (Family)
Stool	OK_nc	0.000679826	Control_V8V9	-0.462069	0.003909	*	Streptococcaceae (Family)
Stool	OK_nc	1.72021e-05	Control_V1	-0.550327	6.59415e-05	*	Streptococcaceae (Family)
Stool	OK_nc	3.97749e-16	Control_V2	0.964103	9.14823e-15	*	Ruminococcaceae (Family)
Stool	OK_nc	1.24062e-15	Control_V3V5	0.872515	2.85343e-14	*	Ruminococcaceae (Family)
Stool	OK_nc	9.60308e-14	Control_V6V7	0.94	2.20871e-12	*	Ruminococcaceae (Family)
Stool	OK_nc	3.49518e-08	Control_V8V9	0.763985	5.2138e-07	*	Ruminococcaceae (Family)
Stool	OK_nc	1.26109e-10	Control_V1	0.849673	1.63202e-09	*	Ruminococcaceae (Family)
Stool	OK_nc	0.000209337	Control_V2	-0.528205	0.000601843	*	Veillonellaceae (Family)
Stool	OK_nc	1.29123e-05	Control_V3V5	-0.474269	4.94972e-05	*	Veillonellaceae (Family)
Stool	OK_nc	0.00677137	Control_V6V7	-0.338889	0.0170889	*	Veillonellaceae (Family)
Stool	OK_nc	0.00711649	Control_V8V9	-0.370115	0.0204599	*	Veillonellaceae (Family)
Stool	OK_nc	0.000334068	Control_V1	-0.471895	0.000960444	*	Veillonellaceae (Family)
Stool	OK_nc	0.038672	Control_V2	-0.296581	0.0808596	.	Clostridiaceae (Family)
Stool	NS	0.78598	Control_V3V5	-0.0298246	0.78598		Clostridiaceae (Family)
Stool	OK_nc	0.00742994	Control_V6V7	-0.337778	0.0170889	*	Clostridiaceae (Family)
Stool	NS	0.345825	Control_V8V9	-0.131034	0.397698		Clostridiaceae (Family)
Stool	NS	0.483649	Control_V1	-0.0928105	0.529711		Clostridiaceae (Family)
Stool	NS	0.0522746	Control_V2	0.276923	0.100193		Coriobacteriaceae (Family)
Stool	OK_nc	0.0653116	Control_V3V5	0.19883	0.0883628	.	Coriobacteriaceae (Family)
Stool	NS	0.313215	Control_V6V7	0.127222	0.423761		Coriobacteriaceae (Family)
Stool	NS	0.226238	Control_V8V9	0.16705	0.290639		Coriobacteriaceae (Family)
Stool	NS	0.313242	Control_V1	0.133333	0.400254		Coriobacteriaceae (Family)
Stool	NS	0.124416	Control_V2	0.218803	0.163762		Tannerellaceae (Family)
Stool	OK_nc	0.00397405	Control_V3V5	0.306725	0.00830939	*	Tannerellaceae (Family)
Stool	OK_nc	0.000163897	Control_V6V7	0.466667	0.000753924	*	Tannerellaceae (Family)
Stool	OK_nc	0.0117916	Control_V8V9	0.344061	0.0246551	*	Tannerellaceae (Family)
Stool	OK_nc	0.0183083	Control_V1	0.306536	0.038281	*	Tannerellaceae (Family)
Stool	OK_nc	1.09109e-05	Control_V2	0.630769	4.14171e-05	*	Erysipelatoclostridiaceae (Family)
Stool	OK_nc	4.32426e-05	Control_V3V5	0.446199	0.000124323	*	Erysipelatoclostridiaceae (Family)
Stool	OK_nc	0.00903867	Control_V6V7	0.33	0.018899	*	Erysipelatoclostridiaceae (Family)
Stool	OK_nc	0.00526412	Control_V8V9	0.386973	0.0187396	*	Erysipelatoclostridiaceae (Family)
Stool	OK_nc	0.000331559	Control_V1	0.47451	0.000960444	*	Erysipelatoclostridiaceae (Family)
Stool	NS	0.208166	Control_V2	0.17094	0.25199		Pasteurellaceae (Family)
Stool	NS	0.511428	Control_V3V5	0.0678363	0.567351		Pasteurellaceae (Family)
Stool	NS	0.675792	Control_V6V7	-0.0511111	0.740153		Pasteurellaceae (Family)
Stool	NS	0.178127	Control_V8V9	0.177011	0.256058		Pasteurellaceae (Family)
Stool	OK_nc	0.0218367	Control_V1	0.279739	0.0386342	*	Pasteurellaceae (Family)
Stool	NS	0.128162	Control_V2	0.208547	0.163762		Sutterellaceae (Family)
Stool	NS	0.197868	Control_V3V5	0.132749	0.252831		Sutterellaceae (Family)
Stool	OK_nc	0.0420298	Control_V6V7	0.244444	0.069049	.	Sutterellaceae (Family)
Stool	NS	0.90002	Control_V8V9	0.0176245	0.94093		Sutterellaceae (Family)
Stool	NS	0.231382	Control_V1	0.151634	0.313047		Sutterellaceae (Family)
Stool	NS	0.241557	Control_V2	0.169231	0.27779		Peptostreptococcaceae (Family)
Stool	OK_nc	0.00519872	Control_V3V5	0.304971	0.00996422	*	Peptostreptococcaceae (Family)
Stool	NS	0.517506	Control_V6V7	0.0822222	0.595132		Peptostreptococcaceae (Family)
Stool	NS	0.145345	Control_V8V9	0.202299	0.222862		Peptostreptococcaceae (Family)
Stool	OK_nc	0.00265432	Control_V1	0.397386	0.00610493	*	Peptostreptococcaceae (Family)
Stool	OK_nc	0.00139945	Control_V2	-0.418803	0.00357636	*	Eggerthellaceae (Family)
Stool	OK_nc	0.0015035	Control_V3V5	-0.321053	0.00345806	*	Eggerthellaceae (Family)
Stool	OK_nc	0.0465615	Control_V6V7	-0.221111	0.0713944	.	Eggerthellaceae (Family)
Stool	OK_nc	0.0041552	Control_V8V9	-0.359387	0.0187396	*	Eggerthellaceae (Family)
Stool	OK_nc	0.00168587	Control_V1	-0.380392	0.00430834	*	Eggerthellaceae (Family)
Stool	OK_nc	1.26052e-05	Control_V2	0.624786	4.14171e-05	*	Monoglobaceae (Family)
Stool	OK_nc	9.12531e-06	Control_V3V5	0.482456	4.19764e-05	*	Monoglobaceae (Family)
Stool	OK_nc	0.00212862	Control_V6V7	0.387778	0.00699402	*	Monoglobaceae (Family)
Stool	OK_nc	0.00570335	Control_V8V9	0.383142	0.0187396	*	Monoglobaceae (Family)
Stool	OK_nc	3.13075e-06	Control_V1	0.613072	1.44014e-05	*	Monoglobaceae (Family)
Stool	NS	0.127953	Control_V2	-0.217094	0.163762		Erysipelotrichaceae (Family)
Stool	OK_nc	0.0588826	Control_V3V5	-0.205263	0.0846438	.	Erysipelotrichaceae (Family)
Stool	OK_nc	0.00470666	Control_V6V7	-0.355556	0.0135316	*	Erysipelotrichaceae (Family)
Stool	OK_nc	0.0249768	Control_V8V9	-0.308812	0.0478721	*	Erysipelotrichaceae (Family)
Stool	OK_nc	0.0693611	Control_V1	-0.239216	0.0997066	.	Erysipelotrichaceae (Family)
Stool	NS	0.0924944	Control_V2	-0.228205	0.153663		Oscillospiraceae (Family)
Stool	OK_nc	0.00619453	Control_V3V5	-0.29152	0.0109596	*	Oscillospiraceae (Family)
Stool	NS	0.441862	Control_V6V7	-0.0911111	0.534885		Oscillospiraceae (Family)
Stool	OK_nc	0.053054	Control_V8V9	-0.257471	0.0871602	.	Oscillospiraceae (Family)
Stool	OK_nc	0.0204046	Control_V1	-0.295425	0.0386342	*	Oscillospiraceae (Family)
Stool	OK_nc	7.06342e-06	Control_V2	0.628205	4.06147e-05	*	Marinifilaceae (Family)
Stool	OK_nc	7.2296e-08	Control_V3V5	0.550585	5.5427e-07	*	Marinifilaceae (Family)
Stool	OK_nc	2.99557e-06	Control_V6V7	0.567222	1.72245e-05	*	Marinifilaceae (Family)
Stool	OK_nc	2.34161e-05	Control_V8V9	0.570115	0.000179523	*	Marinifilaceae (Family)
Stool	OK_nc	4.37083e-07	Control_V1	0.645098	2.51322e-06	*	Marinifilaceae (Family)
Stool	NS	0.567602	Control_V2	-0.0820513	0.593402		Butyricicoccaceae (Family)
Stool	OK_nc	0.0252112	Control_V3V5	-0.243275	0.0386572	*	Butyricicoccaceae (Family)
Stool	OK_nc	0.0347148	Control_V6V7	-0.265556	0.0614185	.	Butyricicoccaceae (Family)
Stool	OK_nc	0.0520196	Control_V8V9	-0.268966	0.0871602	.	Butyricicoccaceae (Family)
Stool	NS	0.355178	Control_V1	-0.121569	0.429952		Butyricicoccaceae (Family)
Stool	OK_nc	0.0247519	Control_V2	0.302564	0.0569293	.	Desulfovibrionaceae (Family)
Stool	OK_nc	0.00143725	Control_V3V5	0.316959	0.00345806	*	Desulfovibrionaceae (Family)
Stool	OK_nc	0.0230821	Control_V6V7	0.266667	0.0442407	*	Desulfovibrionaceae (Family)
Stool	OK_nc	0.011384	Control_V8V9	0.330268	0.0246551	*	Desulfovibrionaceae (Family)
Stool	OK_nc	0.0537916	Control_V1	0.24183	0.0849035	.	Desulfovibrionaceae (Family)
Stool	OK_nc	1.85385e-05	Control_V2	-0.613675	7.41541e-05	*	Gammaproteobacteria (Class)
Stool	OK_nc	5.95778e-10	Control_V3V5	-0.675439	2.38311e-09	*	Gammaproteobacteria (Class)
Stool	OK_nc	2.1107e-06	Control_V6V7	-0.598889	8.4428e-06	*	Gammaproteobacteria (Class)
Stool	OK_nc	1.19537e-07	Control_V8V9	-0.725926	9.56297e-07	*	Gammaproteobacteria (Class)
Stool	OK_nc	1.08989e-09	Control_V1	-0.805229	8.71913e-09	*	Gammaproteobacteria (Class)
Stool	NS	0.137292	Control_V2	-0.213675	0.156905		Bacteroidia (Class)
Stool	OK_nc	0.0392053	Control_V3V5	-0.225146	0.0522738	.	Bacteroidia (Class)
Stool	NS	0.801868	Control_V6V7	0.0322222	0.815482		Bacteroidia (Class)
Stool	NS	0.499087	Control_V8V9	-0.0933333	0.665449		Bacteroidia (Class)
Stool	NS	0.0876884	Control_V1	-0.226144	0.116918		Bacteroidia (Class)
Stool	OK_nc	0.0208656	Control_V2	-0.329915	0.039603	*	Bacilli (Class)
Stool	OK_nc	0.0107708	Control_V3V5	-0.278363	0.0172333	*	Bacilli (Class)
Stool	OK_nc	3.4034e-05	Control_V6V7	-0.51	9.07573e-05	*	Bacilli (Class)
Stool	OK_nc	0.0271214	Control_V8V9	-0.302222	0.0433943	*	Bacilli (Class)
Stool	OK_nc	0.0434598	Control_V1	-0.266667	0.0860666	.	Bacilli (Class)
Stool	OK_nc	9.64353e-09	Control_V2	0.760684	7.71483e-08	*	Clostridia (Class)
Stool	OK_nc	4.09323e-10	Control_V3V5	0.681871	2.38311e-09	*	Clostridia (Class)
Stool	OK_nc	1.02861e-06	Control_V6V7	0.593333	8.22891e-06	*	Clostridia (Class)
Stool	OK_nc	8.48655e-05	Control_V8V9	0.524444	0.000339462	*	Clostridia (Class)
Stool	OK_nc	7.67082e-09	Control_V1	0.715033	3.06833e-08	*	Clostridia (Class)
Stool	OK_nc	0.000209337	Control_V2	-0.528205	0.000558231	*	Negativicutes (Class)
Stool	OK_nc	1.29123e-05	Control_V3V5	-0.474269	3.44328e-05	*	Negativicutes (Class)
Stool	OK_nc	0.00677137	Control_V6V7	-0.338889	0.0135427	*	Negativicutes (Class)
Stool	OK_nc	0.0133966	Control_V8V9	-0.336296	0.0315737	*	Negativicutes (Class)
Stool	OK_nc	0.000334068	Control_V1	-0.471895	0.000890847	*	Negativicutes (Class)
Stool	OK_nc	0.0247519	Control_V2	0.302564	0.039603	*	Desulfovibrionia (Class)
Stool	OK_nc	0.00143725	Control_V3V5	0.316959	0.0028745	*	Desulfovibrionia (Class)
Stool	OK_nc	0.0230821	Control_V6V7	0.266667	0.0369314	*	Desulfovibrionia (Class)
Stool	OK_nc	0.0157868	Control_V8V9	0.312593	0.0315737	*	Desulfovibrionia (Class)
Stool	OK_nc	0.0537916	Control_V1	0.24183	0.0860666	.	Desulfovibrionia (Class)
Stool	OK_nc	1.85385e-05	Control_V2	-0.613675	9.26926e-05	*	Proteobacteria (Phylum)
Stool	OK_sd	5.95778e-10	Control_V3V5	-0.675439	2.97889e-09	*	Proteobacteria (Phylum)
Stool	OK_nc	2.1107e-06	Control_V6V7	-0.598889	1.05535e-05	*	Proteobacteria (Phylum)
Stool	OK_nc	7.84437e-08	Control_V8V9	-0.744061	3.92219e-07	*	Proteobacteria (Phylum)
Stool	OK_nc	1.08989e-09	Control_V1	-0.805229	5.44946e-09	*	Proteobacteria (Phylum)
Stool	OK_nc	0.00321533	Control_V2	0.417094	0.00803833	*	Firmicutes (Phylum)
Stool	OK_sd	2.08637e-05	Control_V3V5	0.464327	5.21593e-05	*	Firmicutes (Phylum)
Stool	NS	0.0820411	Control_V6V7	0.22	0.136735		Firmicutes (Phylum)
Stool	OK_nc	0.0193875	Control_V8V9	0.322605	0.0323126	*	Firmicutes (Phylum)
Stool	OK_nc	9.09367e-07	Control_V1	0.620915	2.27342e-06	*	Firmicutes (Phylum)
Stool	OK_nc	0.0247519	Control_V2	0.302564	0.0412531	*	Desulfobacterota (Phylum)
Stool	OK_sd	0.00143725	Control_V3V5	0.316959	0.00239542	*	Desulfobacterota (Phylum)
Stool	OK_sd	0.0230821	Control_V6V7	0.266667	0.0577053	.	Desulfobacterota (Phylum)
Stool	OK_nc	0.011384	Control_V8V9	0.330268	0.0284599	*	Desulfobacterota (Phylum)
Stool	OK_nc	0.0537916	Control_V1	0.24183	0.0896527	.	Desulfobacterota (Phylum)
Throat	NS	0.0120111	Control_V2	0.356322	0.142814		Streptococcus (Genus)
Throat	NS	0.0159998	Control_V3V5	0.273077	0.111999		Streptococcus (Genus)
Throat	OK_nc	0.000288182	Control_V6V7	0.457364	0.00610892	*	Streptococcus (Genus)
Throat	OK_nc	0.0120156	Control_V8V9	0.326923	0.0700908	.	Streptococcus (Genus)
Throat	NS	0.0122949	Control_V1	0.391941	0.189289		Streptococcus (Genus)
Throat	OK_nc	0.000516331	Control_V2	0.496021	0.0180716	*	Granulicatella (Genus)
Throat	OK_nc	0.000747831	Control_V3V5	0.382051	0.0261741	*	Granulicatella (Genus)
Throat	OK_nc	0.00204776	Control_V6V7	0.391771	0.0177165	*	Granulicatella (Genus)
Throat	OK_nc	0.00683988	Control_V8V9	0.351282	0.0574359	.	Granulicatella (Genus)
Throat	NS	0.128799	Control_V1	0.240537	0.357122		Granulicatella (Genus)
Throat	NS	0.0122412	Control_V2	0.35809	0.142814		Haemophilus (Genus)
Throat	OK_nc	0.00371085	Control_V3V5	0.328846	0.06494	.	Haemophilus (Genus)
Throat	OK_nc	0.00253093	Control_V6V7	0.388193	0.0177165	*	Haemophilus (Genus)
Throat	OK_nc	0.00247712	Control_V8V9	0.396154	0.0436792	*	Haemophilus (Genus)
Throat	NS	0.0526972	Control_V1	0.306471	0.211258		Haemophilus (Genus)
Throat	NS	0.0249204	Control_V2	-0.319187	0.218054		Prevotella_7 (Genus)
Throat	NS	0.01551	Control_V3V5	-0.274359	0.111999		Prevotella_7 (Genus)
Throat	OK_nc	0.000349081	Control_V6V7	-0.451401	0.00610892	*	Prevotella_7 (Genus)
Throat	OK_nc	0.00820512	Control_V8V9	-0.34359	0.0574359	.	Prevotella_7 (Genus)
Throat	NS	0.397087	Control_V1	-0.135531	0.772113		Prevotella_7 (Genus)
Throat	NS	0.280571	Control_V2	0.15473	0.590247		Neisseria (Genus)
Throat	NS	0.0609563	Control_V3V5	0.212179	0.275268		Neisseria (Genus)
Throat	NS	0.0941465	Control_V6V7	0.215265	0.253471		Neisseria (Genus)
Throat	OK_nc	0.0029933	Control_V8V9	0.388462	0.0436792	*	Neisseria (Genus)
Throat	NS	0.0245124	Control_V1	0.355311	0.211258		Neisseria (Genus)
Throat	NS	0.0755081	Control_V2	-0.251989	0.307848		Mogibacterium (Genus)
Throat	NS	0.0276656	Control_V3V5	-0.247436	0.161383		Mogibacterium (Genus)
Throat	OK_nc	0.000851382	Control_V6V7	-0.426357	0.00993279	*	Mogibacterium (Genus)
Throat	NS	0.0596581	Control_V8V9	-0.244872	0.261004		Mogibacterium (Genus)
Throat	NS	0.682178	Control_V1	-0.0647131	0.852722		Mogibacterium (Genus)
Throat	NS	0.0479514	Control_V2	0.270557	0.279716		Lautropia (Genus)
Throat	NS	0.171129	Control_V3V5	0.147436	0.544502		Lautropia (Genus)
Throat	OK_nc	0.0126161	Control_V6V7	0.308289	0.0735937	.	Lautropia (Genus)
Throat	NS	0.0719502	Control_V8V9	0.222436	0.279806		Lautropia (Genus)
Throat	OK_nc	0.00125968	Control_V1	0.479853	0.0440886	*	Lautropia (Genus)
Throat	NS	0.841011	Control_V2	0.0291777	0.988967		Bergeyella (Genus)
Throat	NS	0.0770822	Control_V3V5	0.194231	0.299764		Bergeyella (Genus)
Throat	NS	0.0605951	Control_V6V7	0.234347	0.196515		Bergeyella (Genus)
Throat	OK_nc	0.00374393	Control_V8V9	0.362821	0.0436792	*	Bergeyella (Genus)
Throat	NS	0.593216	Control_V1	0.0842491	0.845007		Bergeyella (Genus)
Throat	NS	0.316224	Control_V2	0.136163	0.590247		Peptococcus (Genus)
Throat	OK_nc	0.00568633	Control_V3V5	0.278205	0.0663405	.	Peptococcus (Genus)
Throat	NS	0.0556879	Control_V6V7	0.226595	0.196515		Peptococcus (Genus)
Throat	NS	0.157191	Control_V8V9	0.175	0.449914		Peptococcus (Genus)
Throat	NS	0.0592829	Control_V1	0.277167	0.211258		Peptococcus (Genus)
Throat	NS	0.0120111	Control_V2	0.356322	0.104097		Streptococcaceae (Family)
Throat	OK_nc	0.0159998	Control_V3V5	0.273077	0.0831991	.	Streptococcaceae (Family)
Throat	OK_nc	0.000288182	Control_V6V7	0.457364	0.00374636	*	Streptococcaceae (Family)
Throat	OK_nc	0.00843688	Control_V8V9	0.346829	0.0438718	*	Streptococcaceae (Family)
Throat	NS	0.0122949	Control_V1	0.391941	0.154136		Streptococcaceae (Family)
Throat	OK_nc	0.000516331	Control_V2	0.496021	0.0134246	*	Carnobacteriaceae (Family)
Throat	OK_nc	0.000747831	Control_V3V5	0.382051	0.0101191	*	Carnobacteriaceae (Family)
Throat	OK_nc	0.00204776	Control_V6V7	0.391771	0.0133104	*	Carnobacteriaceae (Family)
Throat	OK_nc	0.00614561	Control_V8V9	0.360324	0.0399465	*	Carnobacteriaceae (Family)
Throat	NS	0.128799	Control_V1	0.240537	0.257599		Carnobacteriaceae (Family)
Throat	OK_nc	0.00686053	Control_V2	0.386384	0.0891869	.	Pasteurellaceae (Family)
Throat	OK_nc	0.00077839	Control_V3V5	0.380769	0.0101191	*	Pasteurellaceae (Family)
Throat	OK_nc	0.000586633	Control_V6V7	0.44186	0.00508415	*	Pasteurellaceae (Family)
Throat	OK_nc	0.00361954	Control_V8V9	0.385965	0.0399465	*	Pasteurellaceae (Family)
Throat	NS	0.0217977	Control_V1	0.362637	0.154136		Pasteurellaceae (Family)
Throat	NS	0.0241085	Control_V2	-0.320955	0.156705		Prevotellaceae (Family)
Throat	OK_nc	0.00351783	Control_V3V5	-0.330769	0.0304879	*	Prevotellaceae (Family)
Throat	OK_nc	0.000256524	Control_V6V7	-0.460942	0.00374636	*	Prevotellaceae (Family)
Throat	OK_nc	0.0215747	Control_V8V9	-0.303644	0.0934903	.	Prevotellaceae (Family)
Throat	NS	0.0825866	Control_V1	-0.274725	0.195205		Prevotellaceae (Family)
Throat	NS	0.280571	Control_V2	0.15473	0.561141		Neisseriaceae (Family)
Throat	NS	0.0609563	Control_V3V5	0.212179	0.233697		Neisseriaceae (Family)
Throat	NS	0.0941465	Control_V6V7	0.215265	0.203984		Neisseriaceae (Family)
Throat	OK_nc	0.00581166	Control_V8V9	0.365722	0.0399465	*	Neisseriaceae (Family)
Throat	NS	0.0245124	Control_V1	0.355311	0.154136		Neisseriaceae (Family)
Throat	NS	0.268745	Control_V2	-0.158267	0.561141		Anaerovoracaceae (Family)
Throat	NS	0.182727	Control_V3V5	-0.150641	0.431901		Anaerovoracaceae (Family)
Throat	OK_nc	0.0082644	Control_V6V7	-0.339296	0.0429749	*	Anaerovoracaceae (Family)
Throat	NS	0.399176	Control_V8V9	-0.112011	0.610505		Anaerovoracaceae (Family)
Throat	NS	0.791153	Control_V1	0.042735	0.956421		Anaerovoracaceae (Family)
Throat	NS	0.0479514	Control_V2	0.270557	0.207789		Burkholderiaceae (Family)
Throat	NS	0.171129	Control_V3V5	0.147436	0.431901		Burkholderiaceae (Family)
Throat	OK_nc	0.0126161	Control_V6V7	0.308289	0.0546696	.	Burkholderiaceae (Family)
Throat	NS	0.0608287	Control_V8V9	0.234818	0.197693		Burkholderiaceae (Family)
Throat	OK_nc	0.00125968	Control_V1	0.479853	0.0327516	*	Burkholderiaceae (Family)
Throat	NS	0.841011	Control_V2	0.0291777	0.919		Weeksellaceae (Family)
Throat	NS	0.0770822	Control_V3V5	0.194231	0.250517		Weeksellaceae (Family)
Throat	NS	0.0605951	Control_V6V7	0.234347	0.160581		Weeksellaceae (Family)
Throat	OK_nc	0.00330261	Control_V8V9	0.37112	0.0399465	*	Weeksellaceae (Family)
Throat	NS	0.593216	Control_V1	0.0842491	0.923116		Weeksellaceae (Family)
Throat	NS	0.316224	Control_V2	0.136163	0.587274		Peptococcaceae (Family)
Throat	OK_nc	0.00568633	Control_V3V5	0.278205	0.0369611	*	Peptococcaceae (Family)
Throat	NS	0.0556879	Control_V6V7	0.226595	0.160581		Peptococcaceae (Family)
Throat	NS	0.121003	Control_V8V9	0.194332	0.349565		Peptococcaceae (Family)
Throat	NS	0.0592829	Control_V1	0.277167	0.154136		Peptococcaceae (Family)
Throat	OK_nc	0.00129297	Control_V2	0.451813	0.0101725	*	Bacilli (Class)
Throat	OK_nc	0.00772907	Control_V3V5	0.301923	0.0309328	*	Bacilli (Class)
Throat	OK_nc	0.000237242	Control_V6V7	0.463327	0.00118621	*	Bacilli (Class)
Throat	OK_nc	0.0130888	Control_V8V9	0.323077	0.0448825	*	Bacilli (Class)
Throat	NS	0.0912992	Control_V1	0.267399	0.182335		Bacilli (Class)
Throat	NS	0.130958	Control_V2	-0.216622	0.24171		Actinobacteria (Class)
Throat	NS	0.3517	Control_V3V5	-0.105769	0.586166		Actinobacteria (Class)
Throat	OK_nc	0.0292696	Control_V6V7	-0.279666	0.0496693	*	Actinobacteria (Class)
Throat	NS	0.127808	Control_V8V9	-0.2	0.319521		Actinobacteria (Class)
Throat	NS	0.0356509	Control_V1	-0.330891	0.111965		Actinobacteria (Class)
Throat	OK_nc	0.00203451	Control_V2	-0.434129	0.0101725	*	Bacteroidia (Class)
Throat	OK_nc	9.04612e-05	Control_V3V5	-0.44359	0.000904612	*	Bacteroidia (Class)
Throat	OK_nc	2.00425e-05	Control_V6V7	-0.532499	0.000200425	*	Bacteroidia (Class)
Throat	OK_nc	0.0134648	Control_V8V9	-0.321795	0.0448825	*	Bacteroidia (Class)
Throat	NS	0.0280267	Control_V1	-0.345543	0.111965		Bacteroidia (Class)
Throat	NS	0.0481779	Control_V2	-0.282051	0.160593		Clostridia (Class)
Throat	NS	0.0465857	Control_V3V5	-0.225641	0.116464		Clostridia (Class)
Throat	OK_nc	0.0298016	Control_V6V7	-0.279666	0.0496693	*	Clostridia (Class)
Throat	NS	0.364384	Control_V8V9	-0.119231	0.520549		Clostridia (Class)
Throat	NS	0.498425	Control_V1	-0.108669	0.603576		Clostridia (Class)
Throat	NS	0.70518	Control_V2	-0.0548187	0.783533		Coriobacteriia (Class)
Throat	NS	0.463021	Control_V3V5	-0.0833333	0.661459		Coriobacteriia (Class)
Throat	OK_nc	0.0274104	Control_V6V7	-0.28384	0.0496693	*	Coriobacteriia (Class)
Throat	NS	0.300732	Control_V8V9	-0.135897	0.50122		Coriobacteriia (Class)
Throat	NS	0.127635	Control_V1	0.240537	0.182335		Coriobacteriia (Class)
Throat	NS	0.0782348	Control_V2	0.251989	0.195587		Gammaproteobacteria (Class)
Throat	OK_nc	0.00927985	Control_V3V5	0.294872	0.0309328	*	Gammaproteobacteria (Class)
Throat	OK_nc	0.0044757	Control_V6V7	0.365534	0.014919	*	Gammaproteobacteria (Class)
Throat	OK_nc	0.00495868	Control_V8V9	0.367949	0.0448825	*	Gammaproteobacteria (Class)
Throat	OK_nc	0.00804073	Control_V1	0.418803	0.0804073	.	Gammaproteobacteria (Class)
Throat	NS	0.0401875	Control_V2	0.292661	0.140656		Firmicutes (Phylum)
Throat	NS	0.0837101	Control_V3V5	0.196154	0.195324		Firmicutes (Phylum)
Throat	OK_nc	0.0140531	Control_V6V7	0.314252	0.024593	*	Firmicutes (Phylum)
Throat	OK_nc	0.0482634	Control_V8V9	0.261808	0.0952884	.	Firmicutes (Phylum)
Throat	NS	0.146194	Control_V1	0.230769	0.204672		Firmicutes (Phylum)
Throat	NS	0.158437	Control_V2	-0.202476	0.197396		Actinobacteriota (Phylum)
Throat	NS	0.203735	Control_V3V5	-0.144231	0.28523		Actinobacteriota (Phylum)
Throat	OK_nc	0.0136838	Control_V6V7	-0.315444	0.024593	*	Actinobacteriota (Phylum)
Throat	OK_nc	0.0544505	Control_V8V9	-0.255061	0.0952884	.	Actinobacteriota (Phylum)
Throat	OK_nc	0.0432658	Control_V1	-0.318681	0.0783753	.	Actinobacteriota (Phylum)
Throat	OK_nc	0.00203451	Control_V2	-0.434129	0.0142415	*	Bacteroidota (Phylum)
Throat	OK_sd	9.04612e-05	Control_V3V5	-0.44359	0.000633229	*	Bacteroidota (Phylum)
Throat	OK_nc	2.00425e-05	Control_V6V7	-0.532499	0.000140297	*	Bacteroidota (Phylum)
Throat	OK_nc	0.0111129	Control_V8V9	-0.334683	0.0388953	*	Bacteroidota (Phylum)
Throat	OK_nc	0.0280267	Control_V1	-0.345543	0.0783753	.	Bacteroidota (Phylum)
Throat	NS	0.0782348	Control_V2	0.251989	0.182548		Proteobacteria (Phylum)
Throat	OK_sd	0.00927985	Control_V3V5	0.294872	0.0324795	*	Proteobacteria (Phylum)
Throat	OK_nc	0.0044757	Control_V6V7	0.365534	0.0156649	*	Proteobacteria (Phylum)
Throat	OK_nc	0.00818557	Control_V8V9	0.350877	0.0388953	*	Proteobacteria (Phylum)
Throat	OK_nc	0.00804073	Control_V1	0.418803	0.0562851	.	Proteobacteria (Phylum)
Throat	NS	0.169197	Control_V2	0.195402	0.197396		Patescibacteria (Phylum)
Throat	NS	0.173664	Control_V3V5	0.152564	0.28523		Patescibacteria (Phylum)
Throat	NS	0.896114	Control_V6V7	-0.0172928	0.896114		Patescibacteria (Phylum)
Throat	NS	0.576992	Control_V8V9	0.074224	0.673158		Patescibacteria (Phylum)
Throat	OK_nc	0.0447859	Control_V1	0.313797	0.0783753	.	Patescibacteria (Phylum)

[truncated: 8 more sheets: Supp_data11, Supp_data12, Supp_data13, Supp_data14, Supp_data15, Supp_data16, Supp_data17, Supp_data18]
